# Supplementary material
Source: PubMed Central journal article supplement (PMC4429898)
Supplement: NIHMS687483-supplement-BasuRoy_et_al__2015-sup_data.pdf [file NIHMS687483-supplement-BasuRoy_et_al__2015-sup_data.pdf]

## **Supplementary Figure 1** GSEA enrichment plot showing significantly up and down regulated genesets in Sox2-depleted mOS-482 cells

Gene sets significantly UP upon Sox2 depletion in osteosarcoma 482 cells

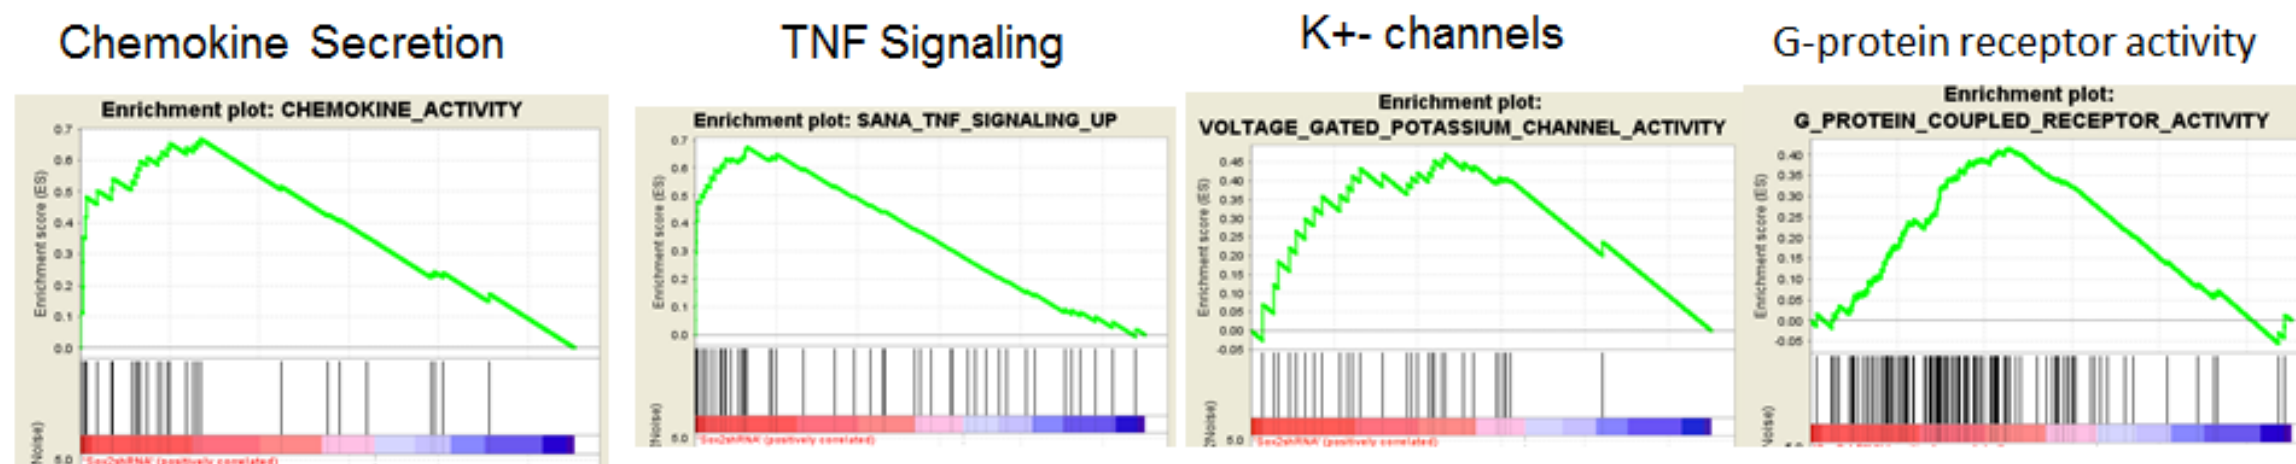

Gene sets significantly DOWN upon Sox2 depletion in osteosarcoma 482 cells

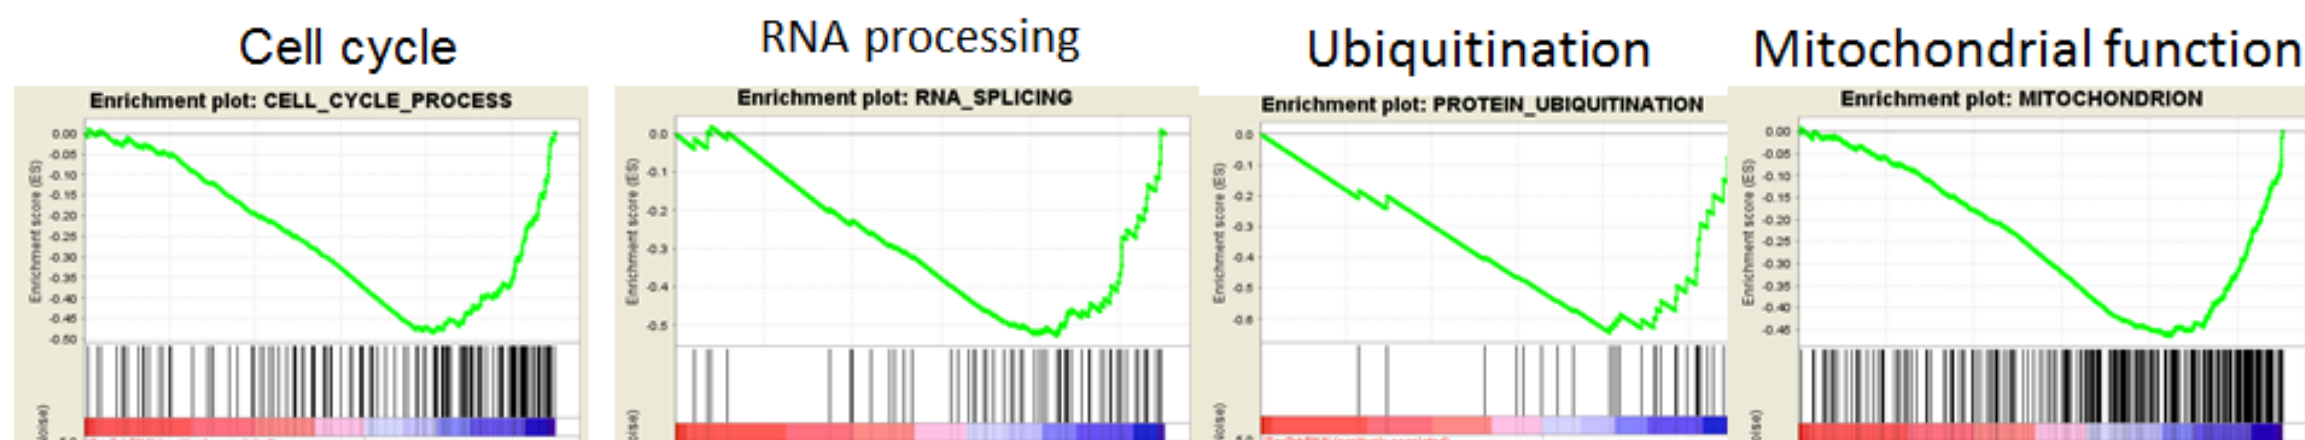

**Supplementary Figure 1** GSEA enrichment plots showing expression enrichment of the indicated genesets.

A **positive enrichment** score (top) shows genesets enriched in Sox2 shRNA cells (red). A **negative enrichment** score indicates enrichment in control cells expressing scrambled shRNA (blue). Bars represent individual genes in the geneset list.

**Supplementary Figure 2** TAZ depletion does not affect sphere formation

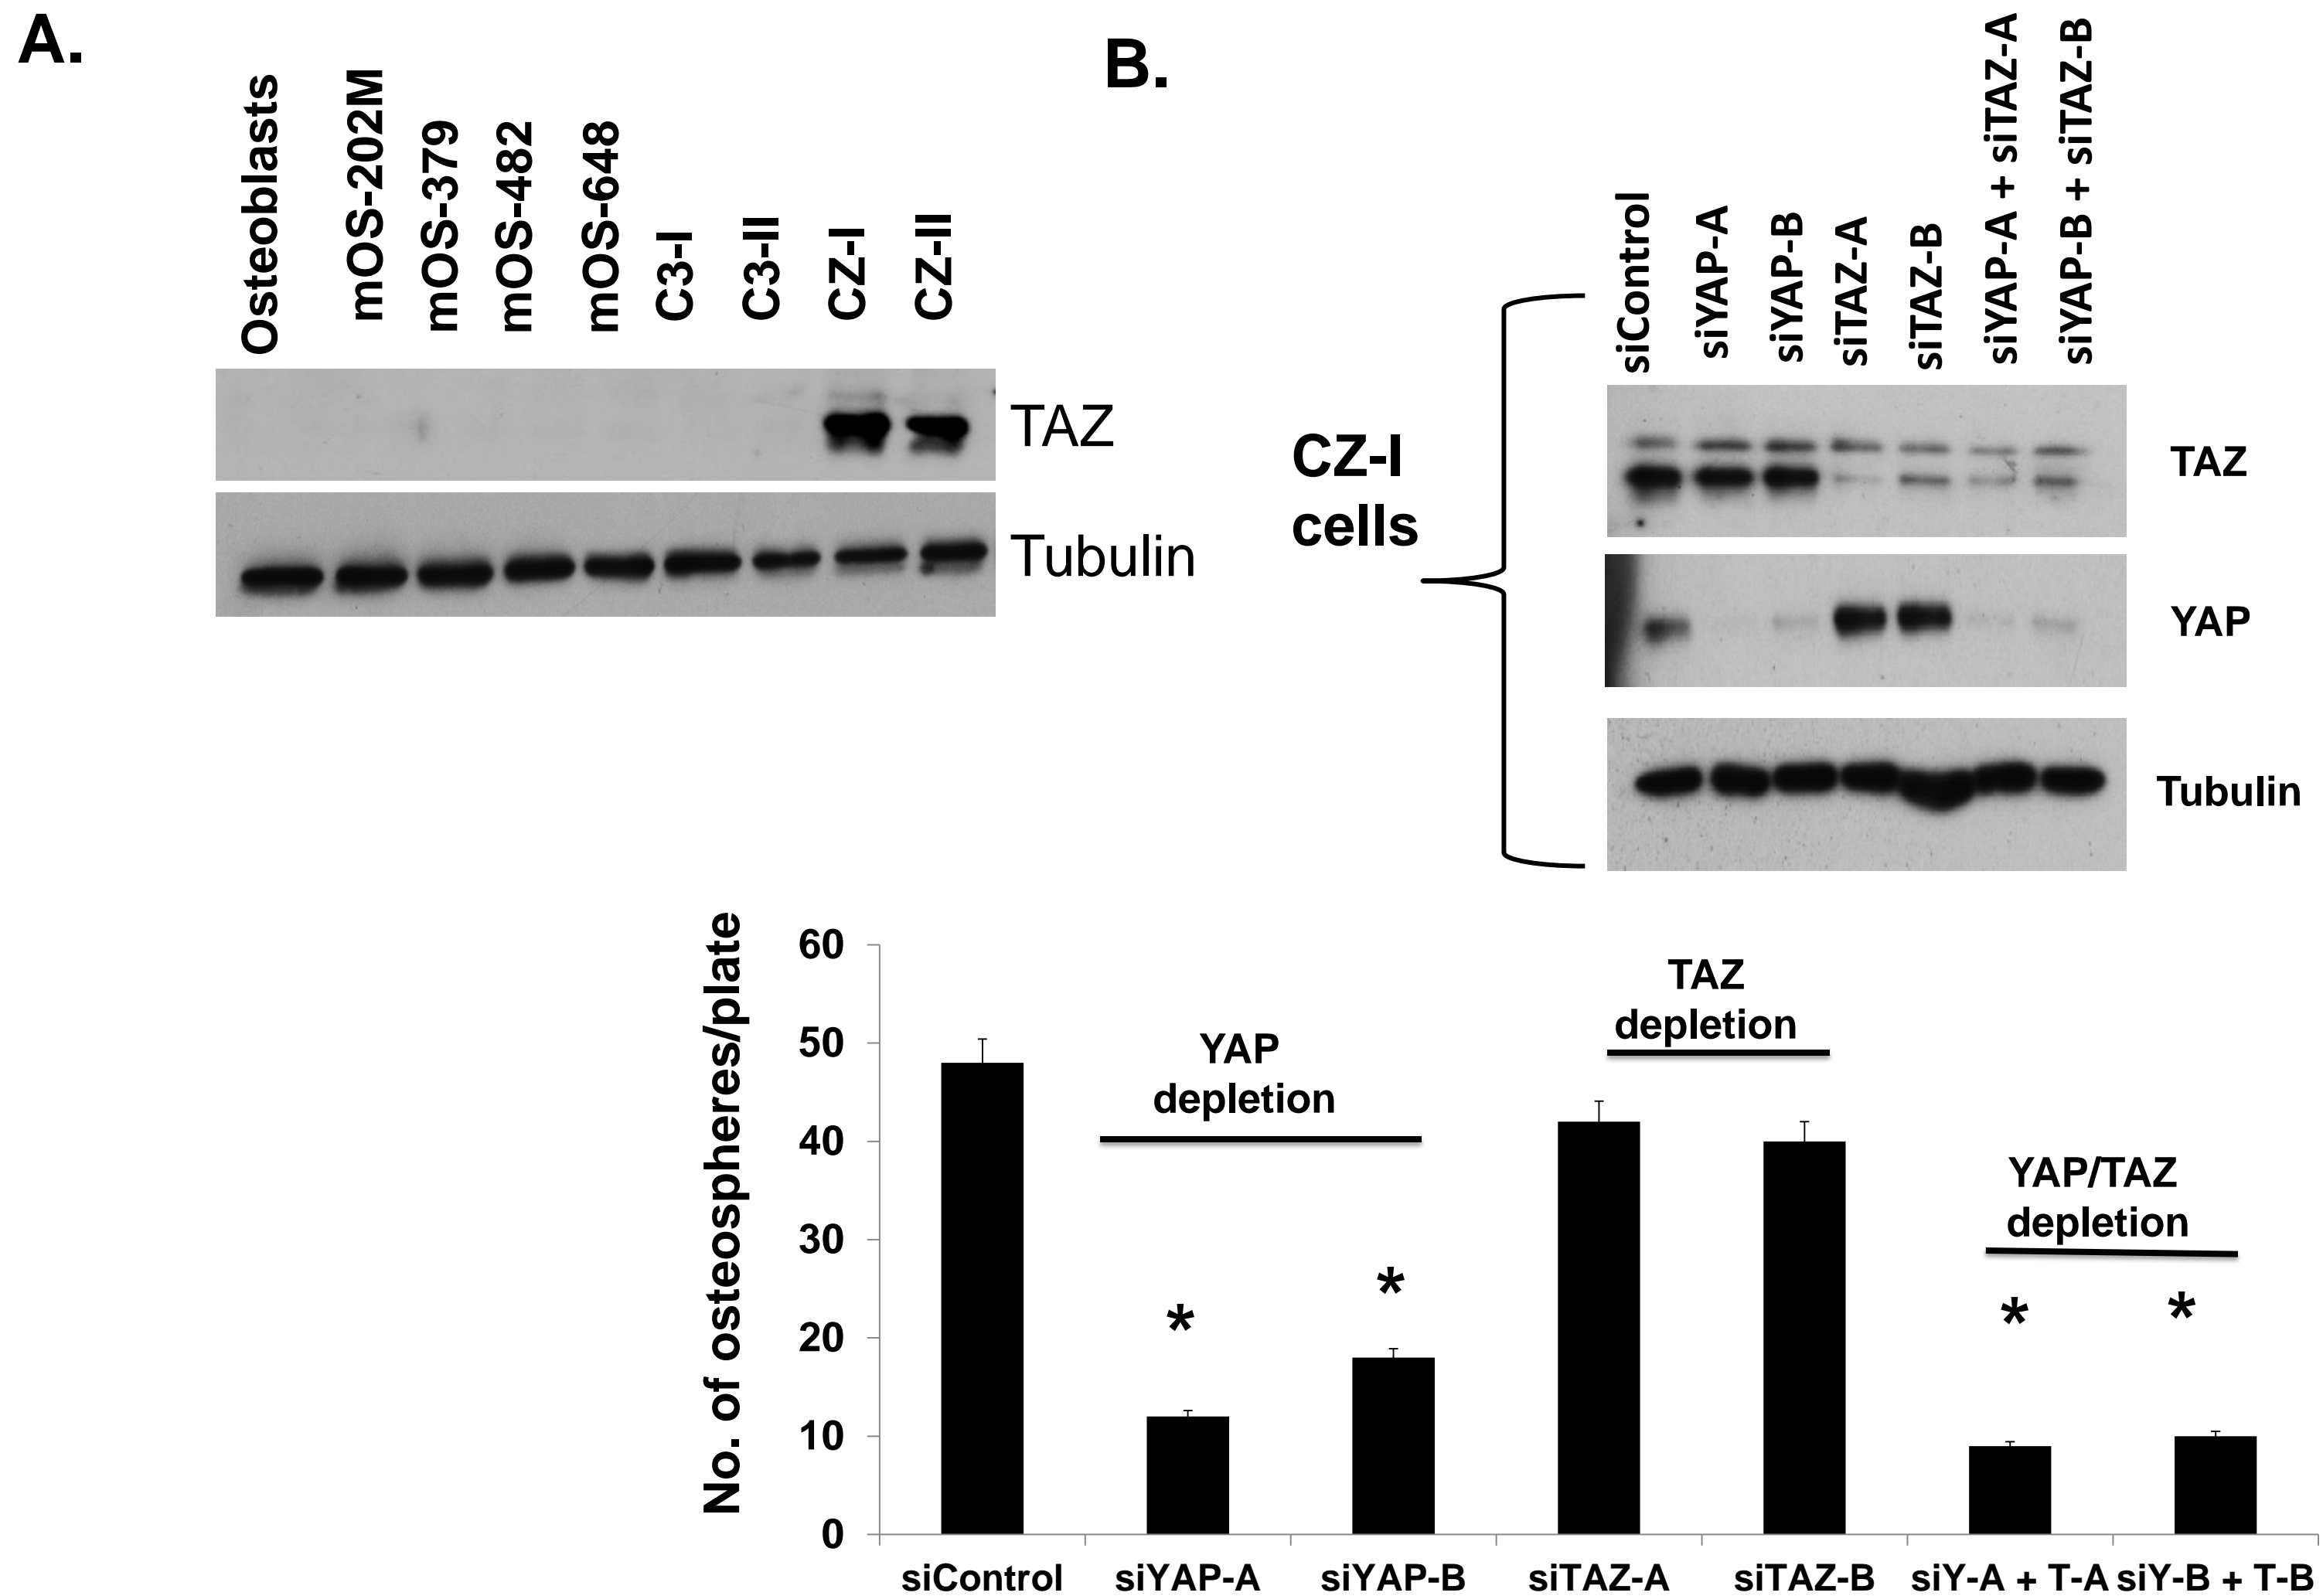

**Supplementary Figure 2.** A. Western analysis of TAZ in murine osteosarcoma cells. Only CZ-I and CZ-II cells showed significant TAZ expression.

B. Depletion of YAP, but not TAZ, by siRNAs decreases sphere formation in CZ-I cells.

Upper panel – Western analysis of YAP and TAZ expression in CZ-I cells transfected with two independent siRNAs for YAP (siYAP-A and siYAP-B) and TAZ (siTAZ-A and siTAZ-B) either singly or together

Lower panel – Secondary sphere assay of CZ-I cells expressing indicated siRNAs singly or together (siY-A + T-A and siY-B + T-B), \* =  $p < 0.05$  by ANOVA. Error bars represent mean  $\pm$  S.D.

**Supplementary Figure 3** Sox2 depletion leads to increased cytoplasmic YAP localization in mOS-482 cells.

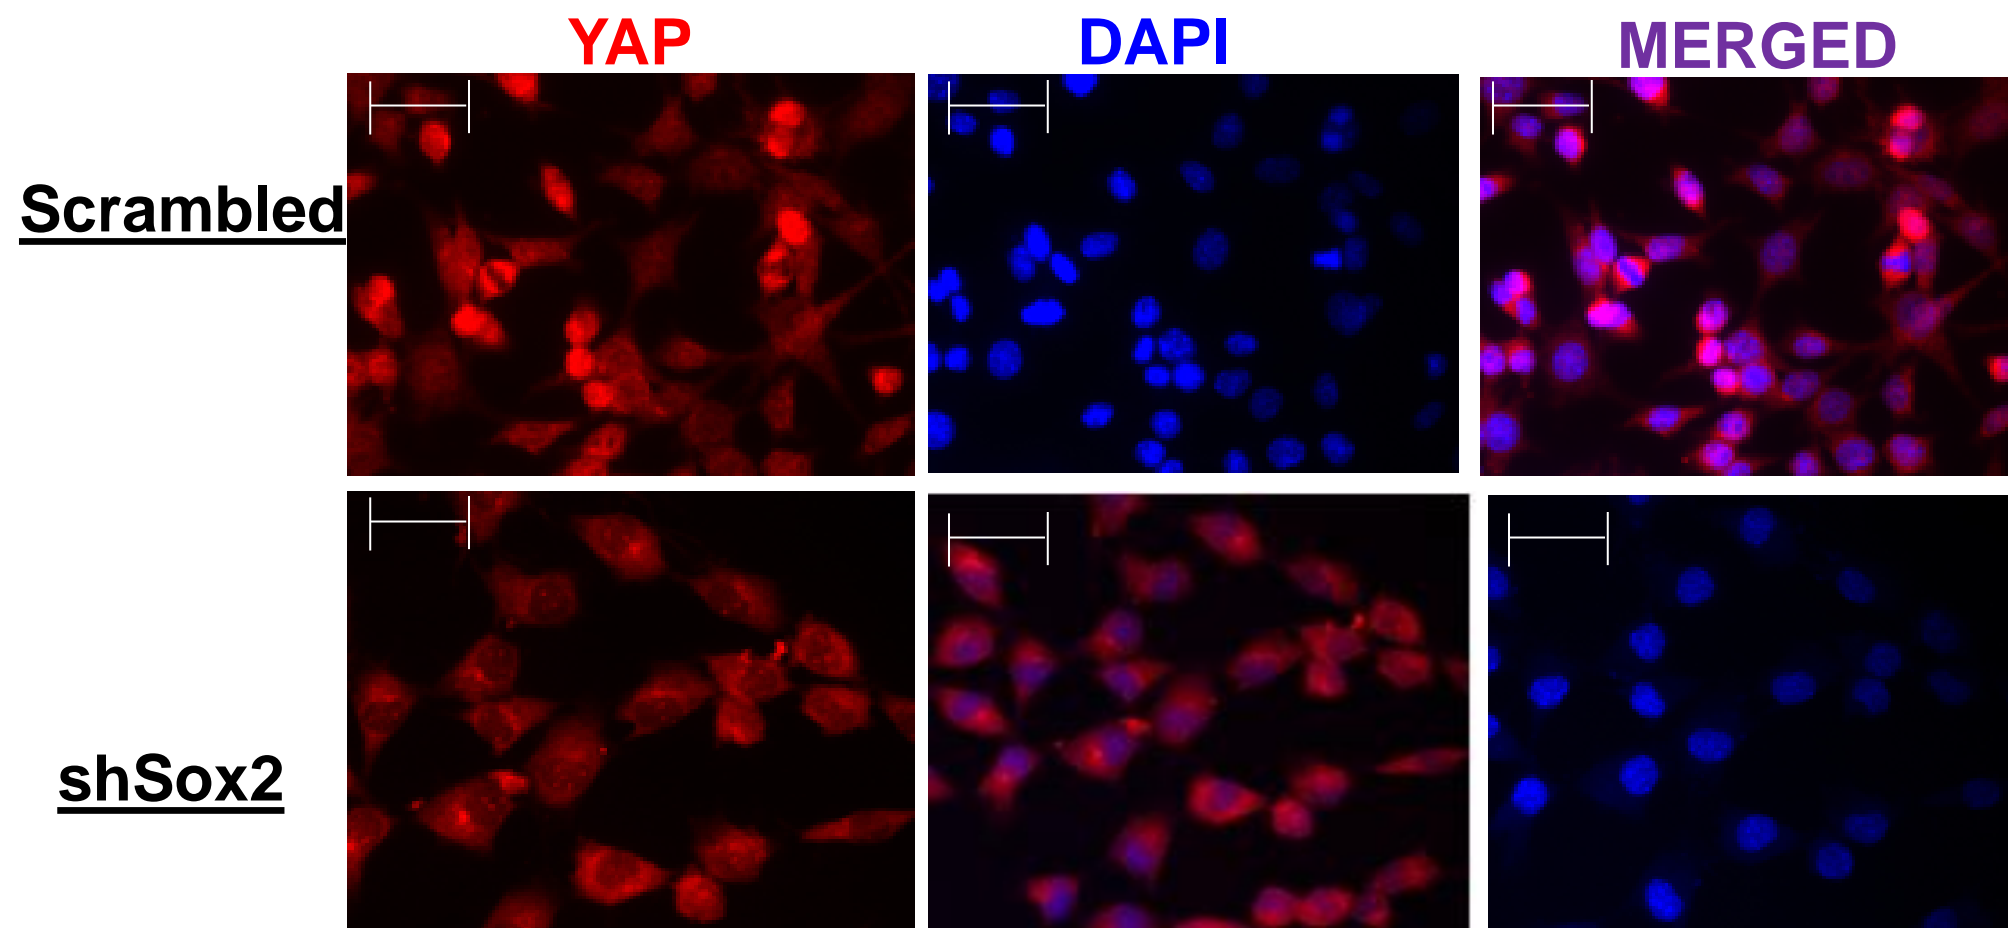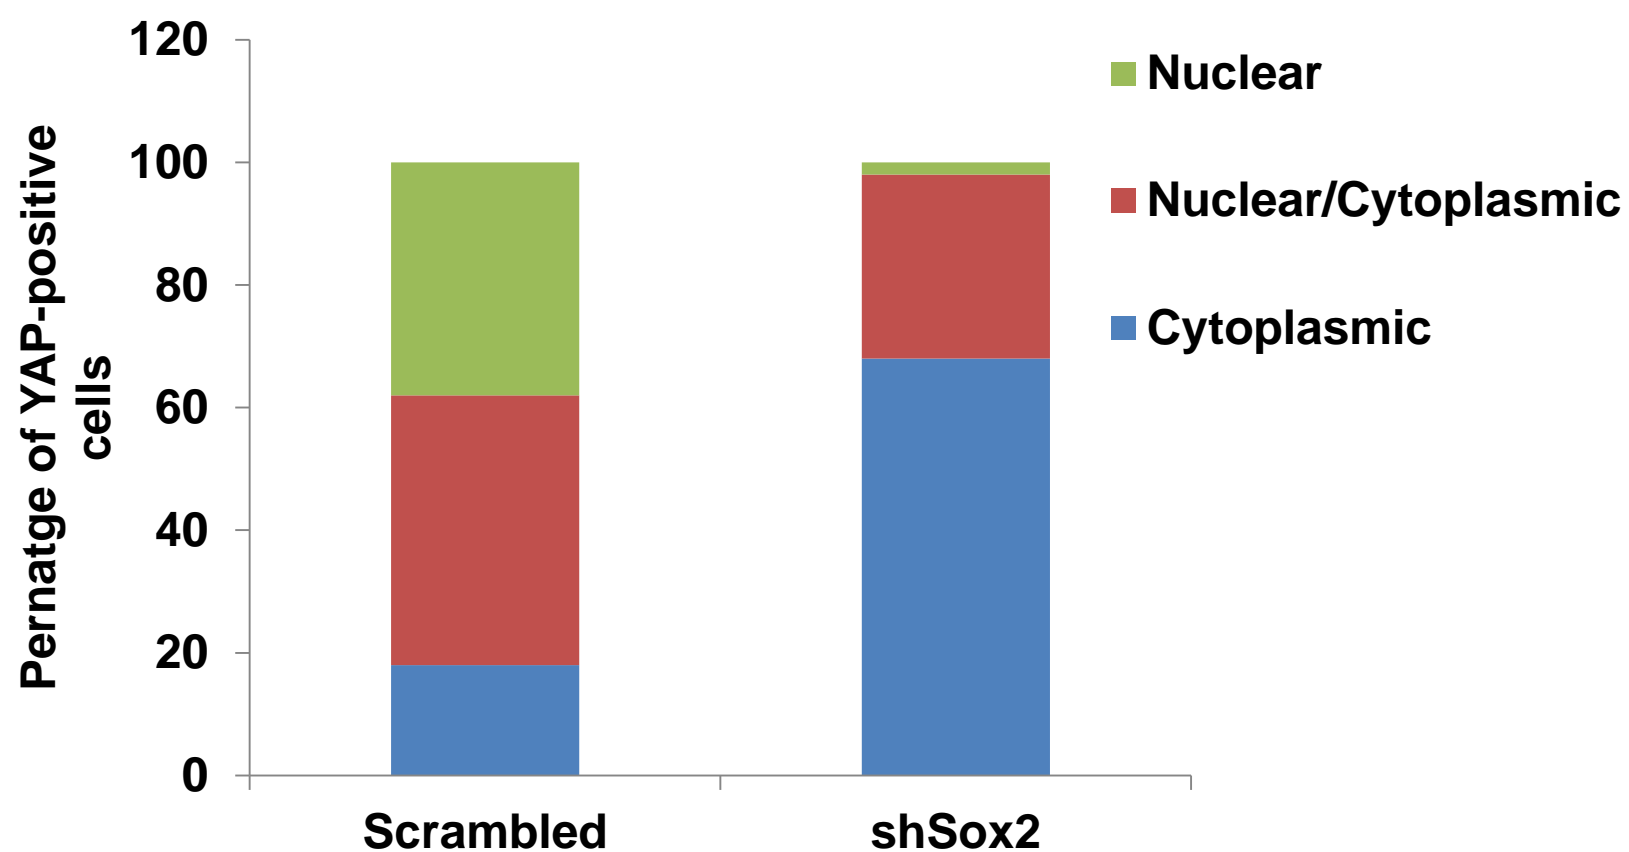

**Supplementary Figure 3.** mOS-482 cells expressing scrambled or shSox2 retrovirus were grown for 48 hours, stained with anti-YAP antibody and imaged at 40X magnification using a Zeiss Axioplan 2 fluorescence microscope. Nuclei were stained with DAPI. Five representative fields were quantified for percentage of cells staining nuclear, cytoplasmic or both nuclear/cytoplasmic in each condition. Average counts are presented. Scale bar = 50  $\mu$ M

## Supplementary Figure 4

YAP, Nf2 and WWC1 mRNA expression in spheres/adherent cells and Sca-1<sup>High/Low</sup> cells

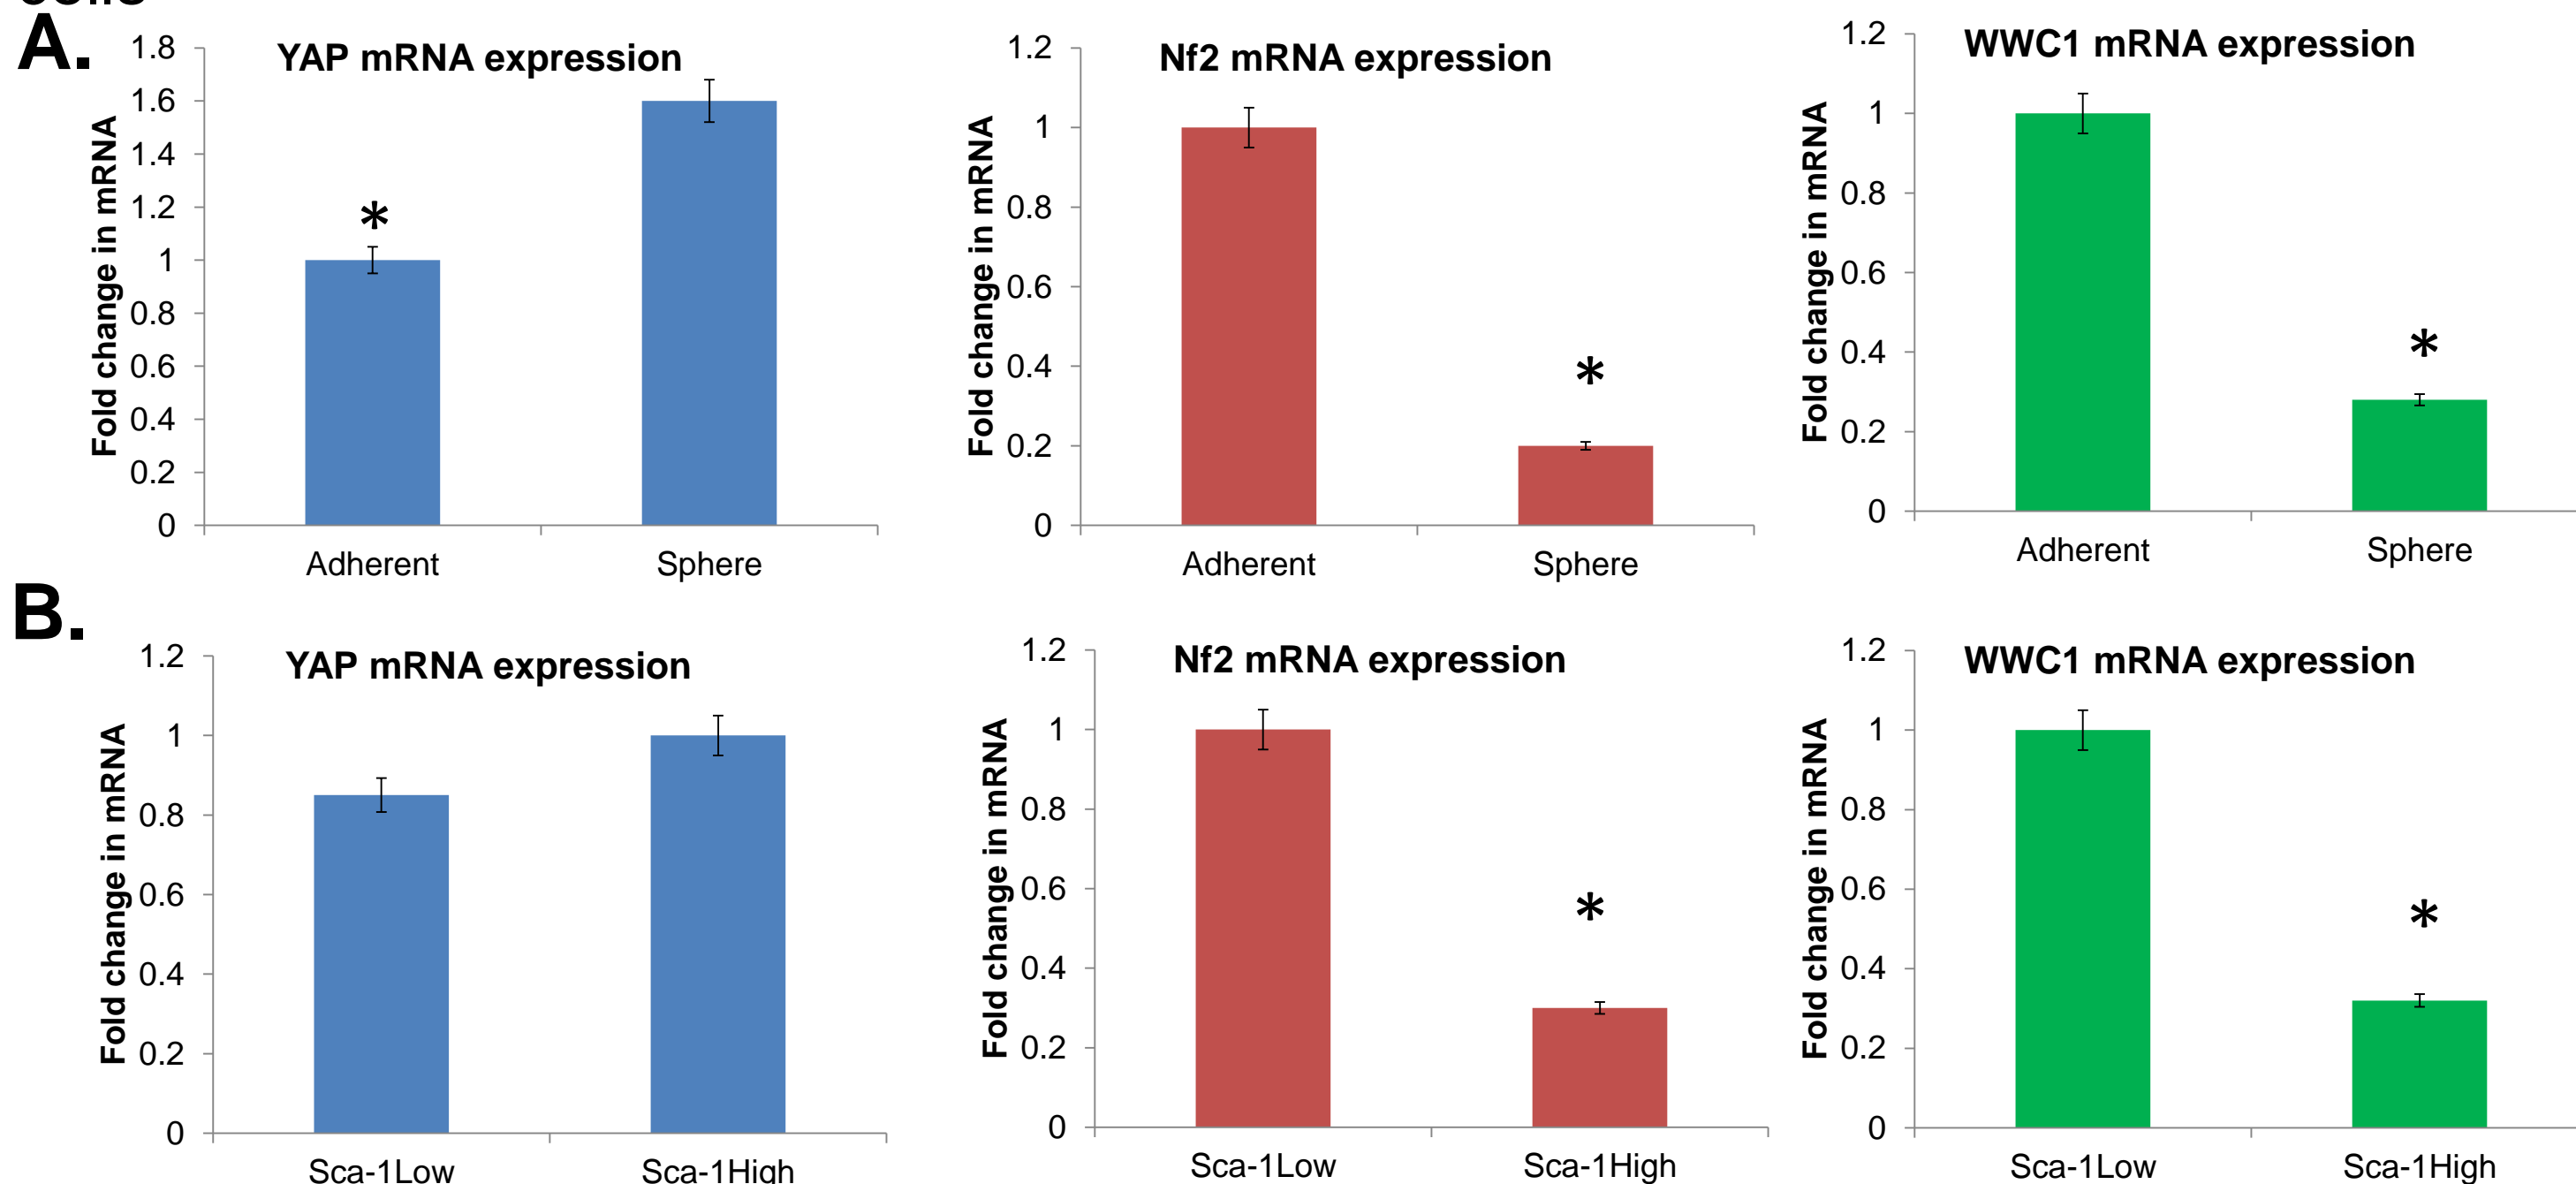

### Supplementary Figure 4A and B.

qRT-PCR analysis of YAP, Nf2 and WWC1 mRNA expression

A. Adherent mOS-482 cells and secondary spheres derived from mOS-482 cells

B. B. Sca1<sup>High/Low</sup> cells.

mRNA expression was normalized to actin. \* =  $p < 0.05$  by t-test. Error bars represent mean  $\pm$  S.D.

**C.** mRNA expression of YAP target genes in mOS-482 cells expressing YAP shRNA

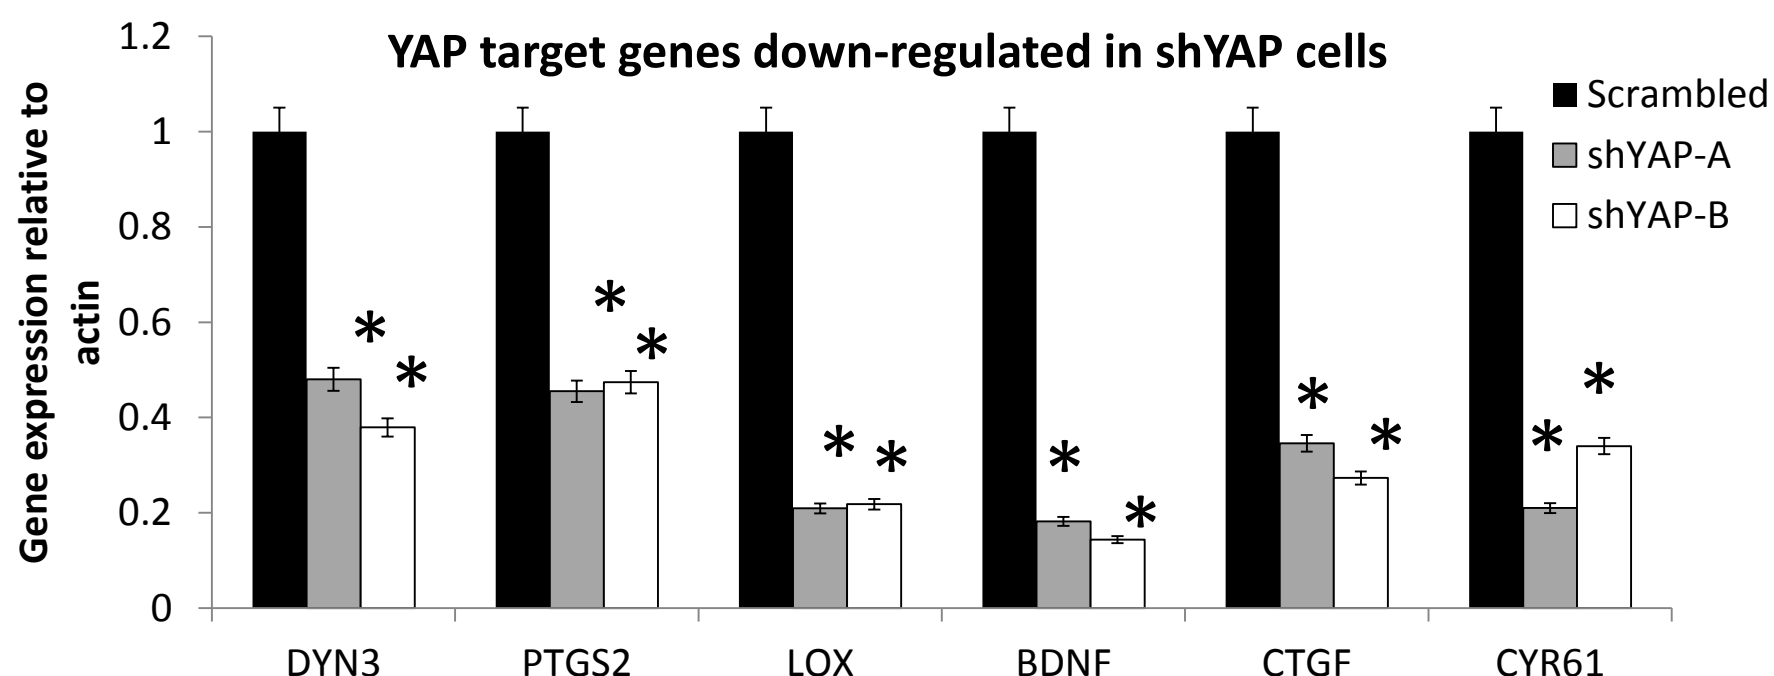

**Supplementary Figure 4C** mRNA expression was normalized to actin. \* =  $p < 0.05$  by ANOVA. Error bars represent mean  $\pm$  S.D.

**Supplementary Figure 5** A. YAP overexpression in primary osteoblasts increases sphere formation and blocks osteogenic differentiation.

**A.**

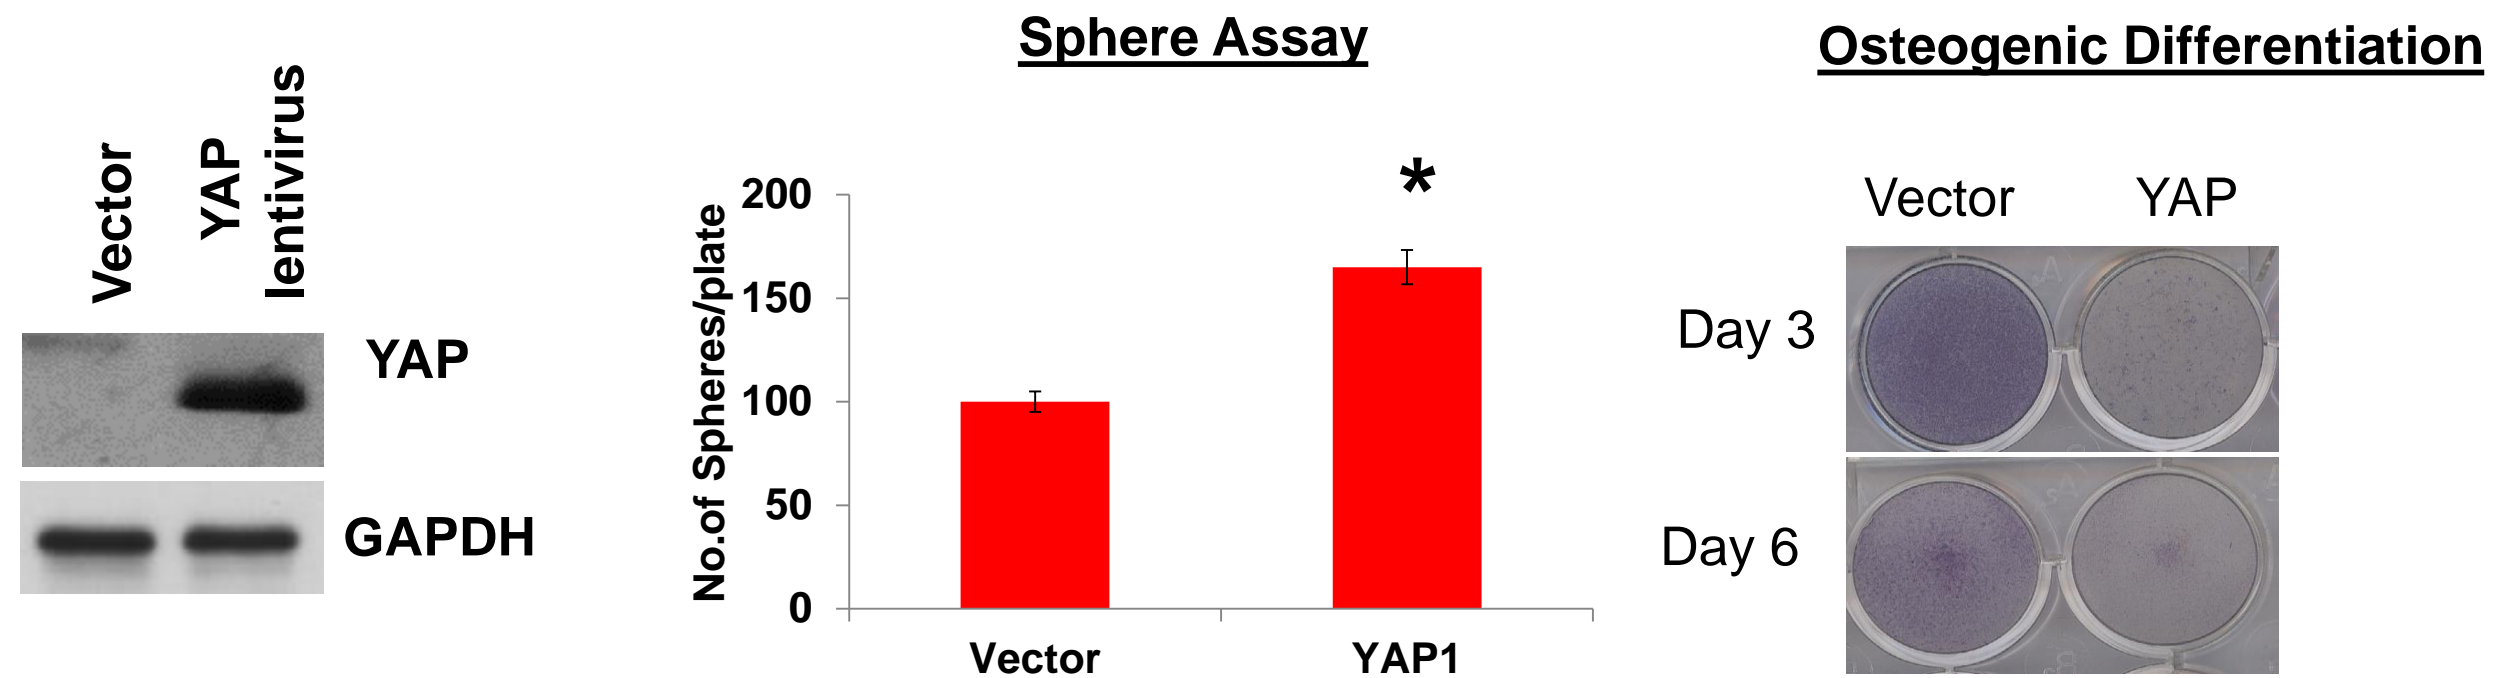

**B.** Increased YAP and low Nf2/WWC1 expression in low passage mOS cells.

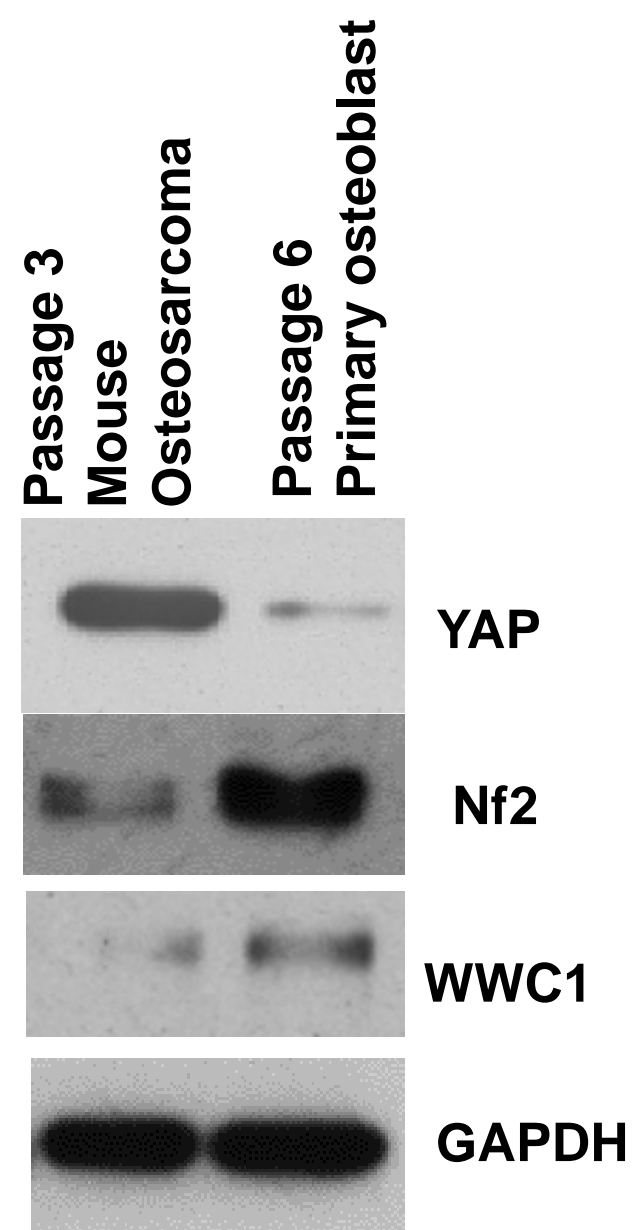

**Supplementary Figure 5**

A. YAP overexpression increases sphere formation and decreases osteogenic differentiation of primary osteoblasts. Left panel – Western analysis of YAP expression in primary osteoblasts expressing control or YAP lentivirus. Center panel – osteosphere assay. Right panel – Osteogenic differentiation

B. Western analysis of YAP, Nf2 and WWC1 expression in mouse osteosarcoma cells (passage 3) and primary osteoblasts (passage 6). Low passage osteosarcoma cells also have high YAP and decreased Nf2 and WWC1 expression.

# Supplementary Figure 6 Osteogenic and adipogenic differentiation marker genes by qRT-PCR analysis.

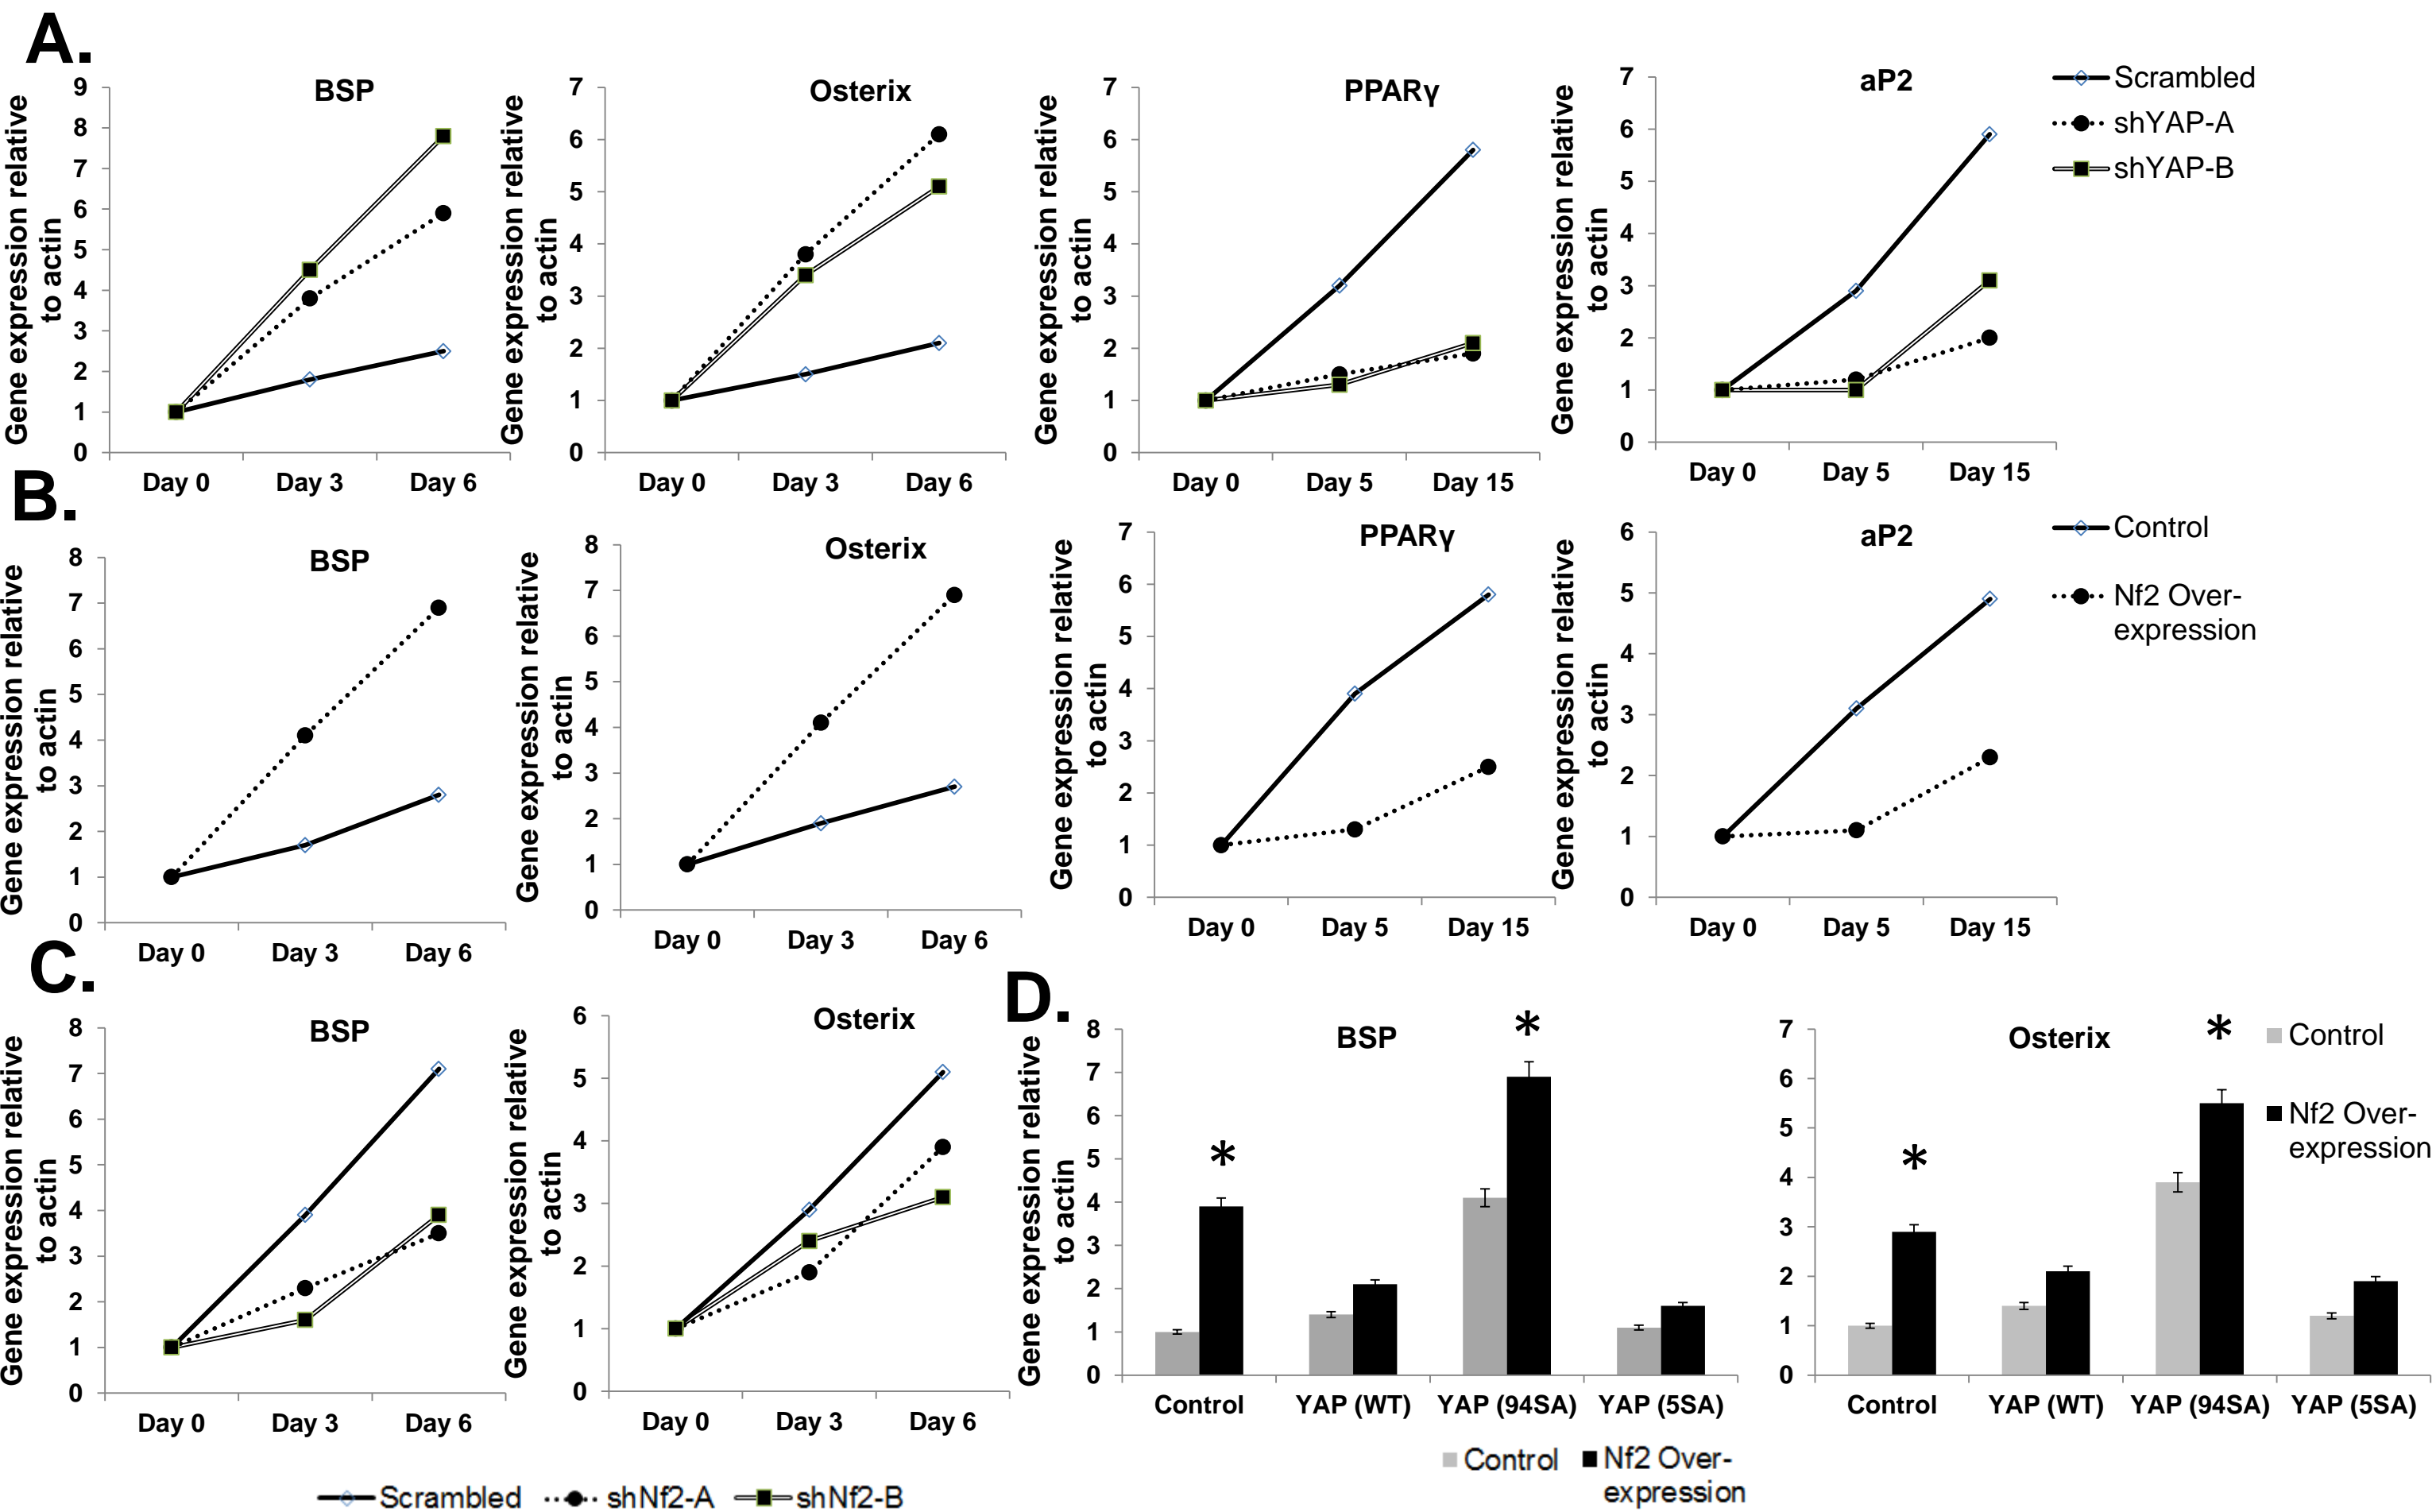

## Supplementary Figure 6

mRNA expression is normalized to actin.

A. BSP and Osterix expression for osteogenic, and PPAR $\gamma$  and aP2 expression for adipogenic differentiation shown in Figure 3D

B. BSP and Osterix expression for osteogenic, and PPAR $\gamma$  and aP2 expression adipogenic differentiation shown in Figure 4A

C. BSP and Osterix expression for osteogenic differentiation shown in Figure 4B

D. BSP and Osterix expression for osteogenic differentiation (day 6) shown in Figure 4D. \* = p < 0.05 by t-test. Error bars represent mean  $\pm$  S.D.

**Supplementary Figure 7** YAP mRNA expression is not significantly altered in Sox2-depleted murine and human OS lines

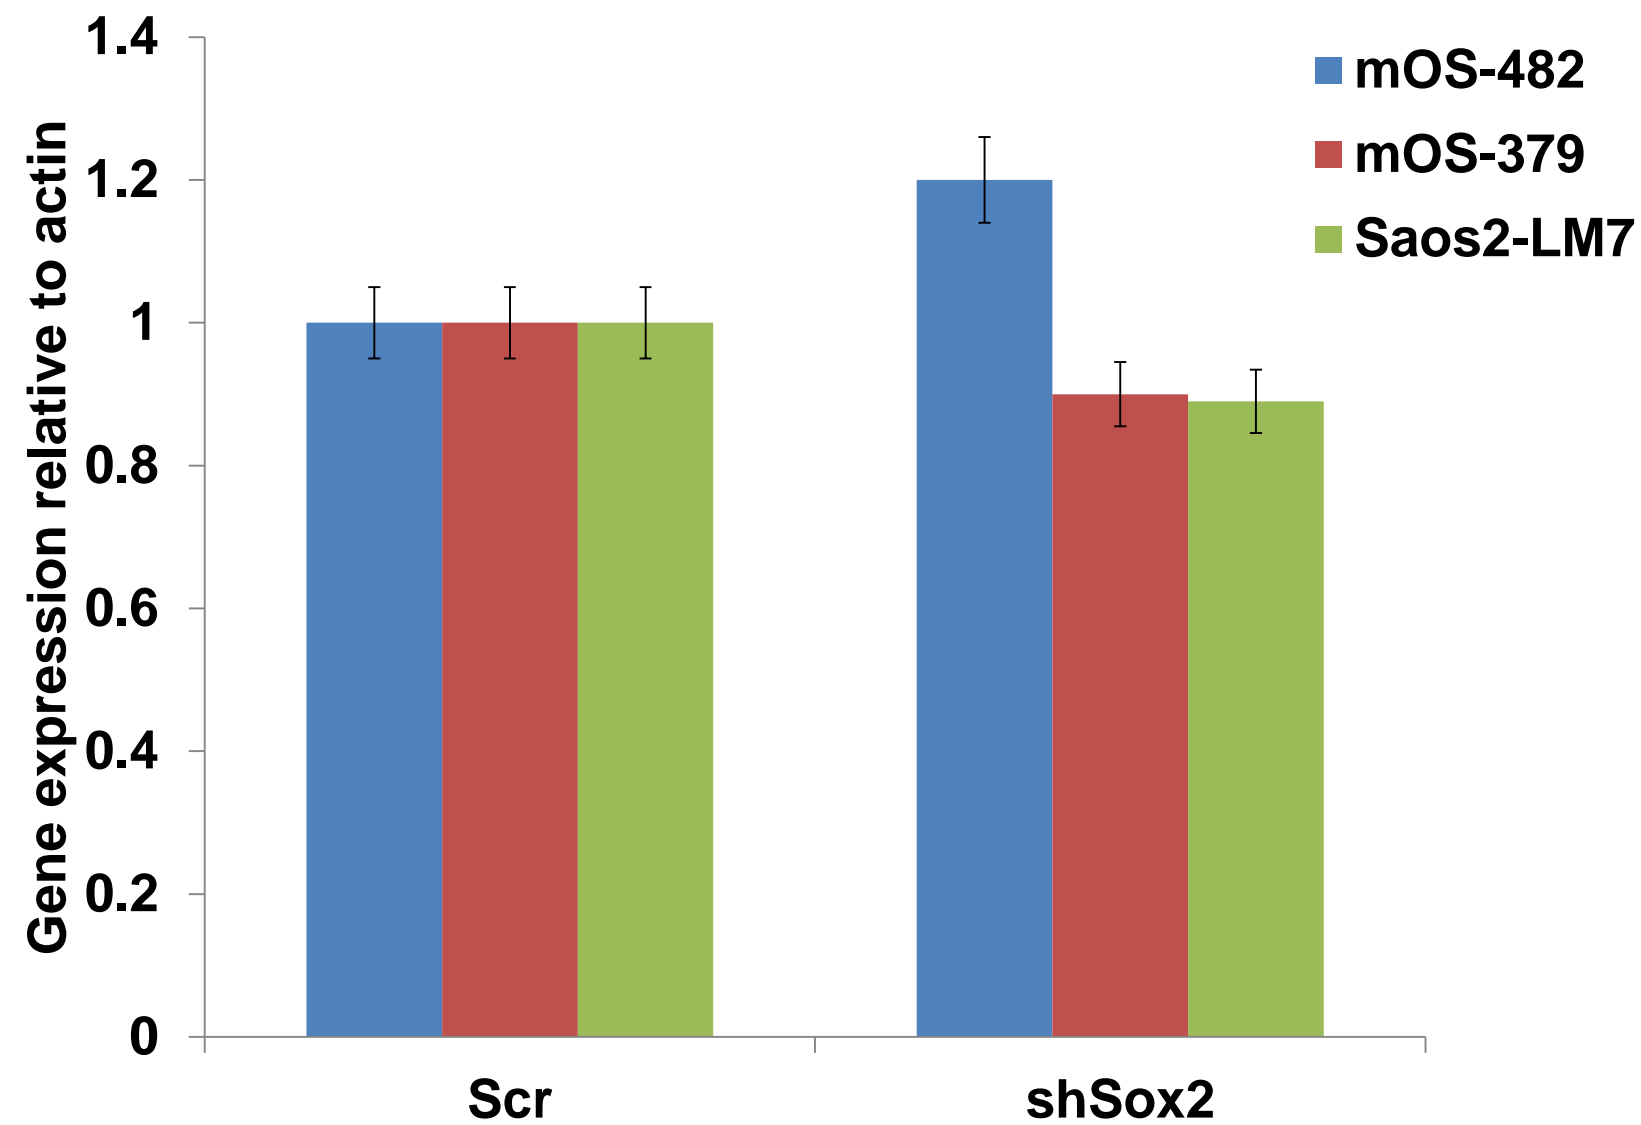

**Supplementary Figure 7** mOS-482 cells (murine), mOS-379 cells (murine) and Saos2-LM7 (human) cells were transduced with a control (scr) or Sox2 shRNA lentivirus. qRT-PCR of YAP mRNA expression normalized to actin. \* =  $p < 0.05$ . Error bars represent mean  $\pm$  S.D.

**Supplementary Figure 8** mRNA expression of Nf2, YAP and WWC1 in NIH-3T3 cells expressing control, shNf2 lentivirus or Sox2 lentivirus (associated with Figure 8A)

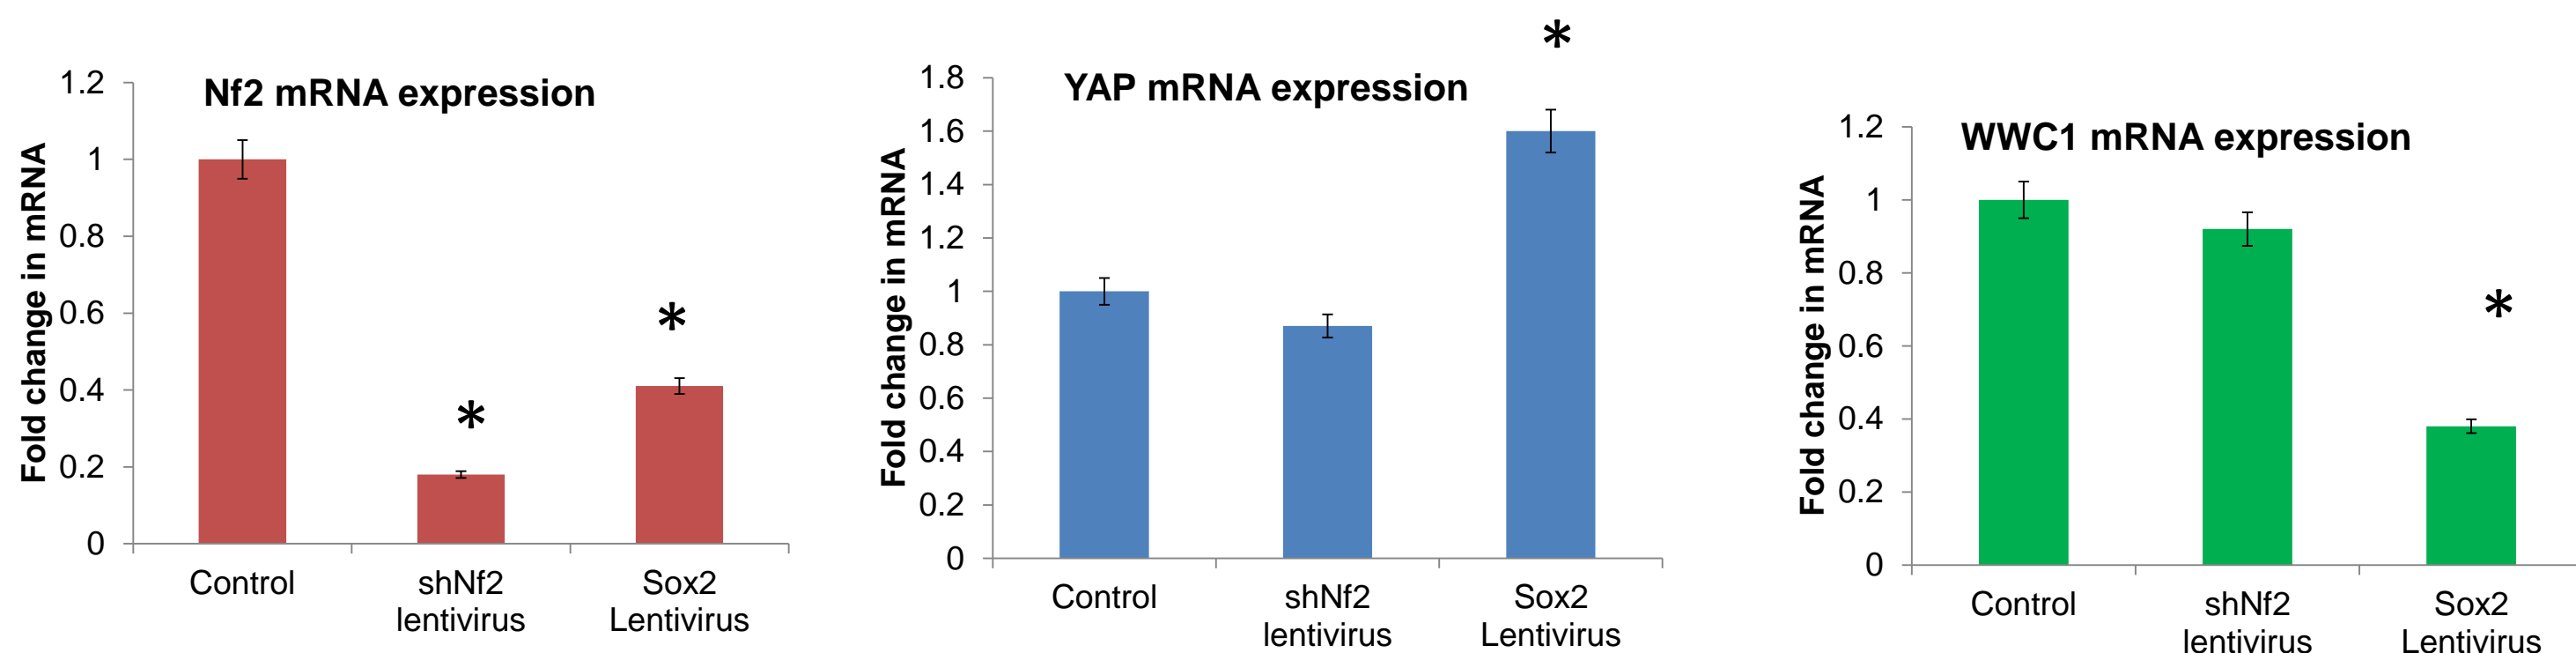

**Supplementary Figure 8.** qRT-PCR analysis mRNA expression normalized to actin. \* = p < 0.05 by t-test. Error bars represent mean  $\pm$  S.D.



**Supplementary Figure 9** Nf2 and WWC1 expression are increased in human osteosarcoma cell lines depleted of Sox2

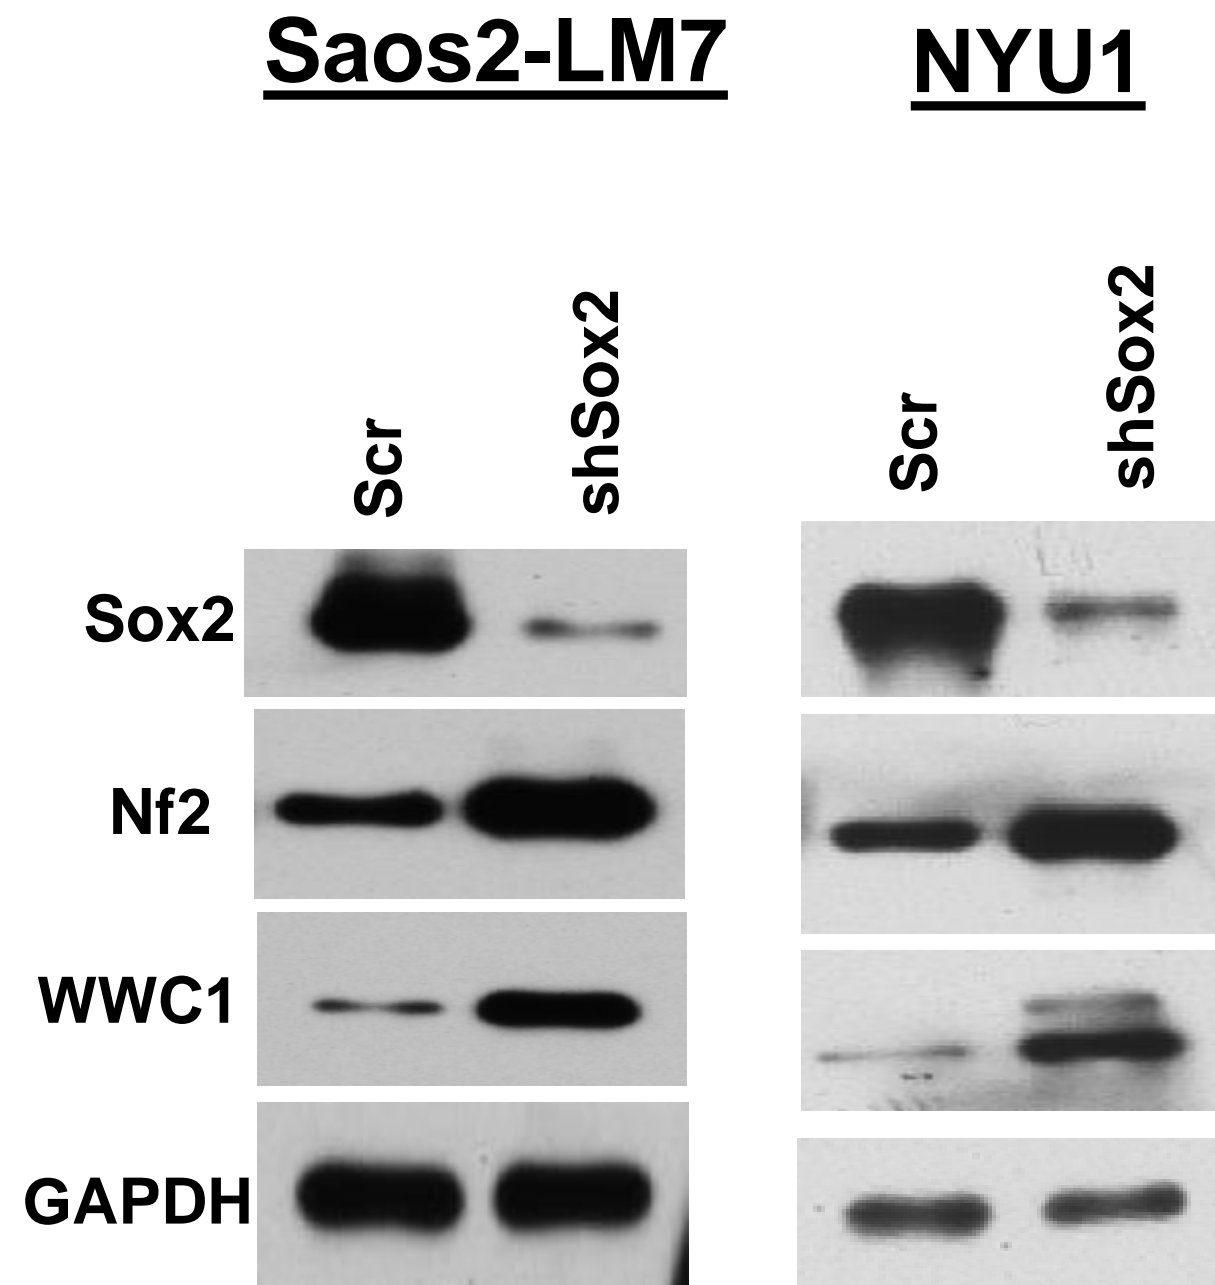

**Supplementary Figure 9.** Saos-2-LM7 or primary human osteosarcoma cells from fresh biopsy (NYU1) expressing either Scrambled (Scr) or human Sox2 shRNA (shSox2) were analyzed for Sox2, Nf2 and WWC1 expression by Western analysis. GAPDH was used as a loading control.

**Figure 1C**

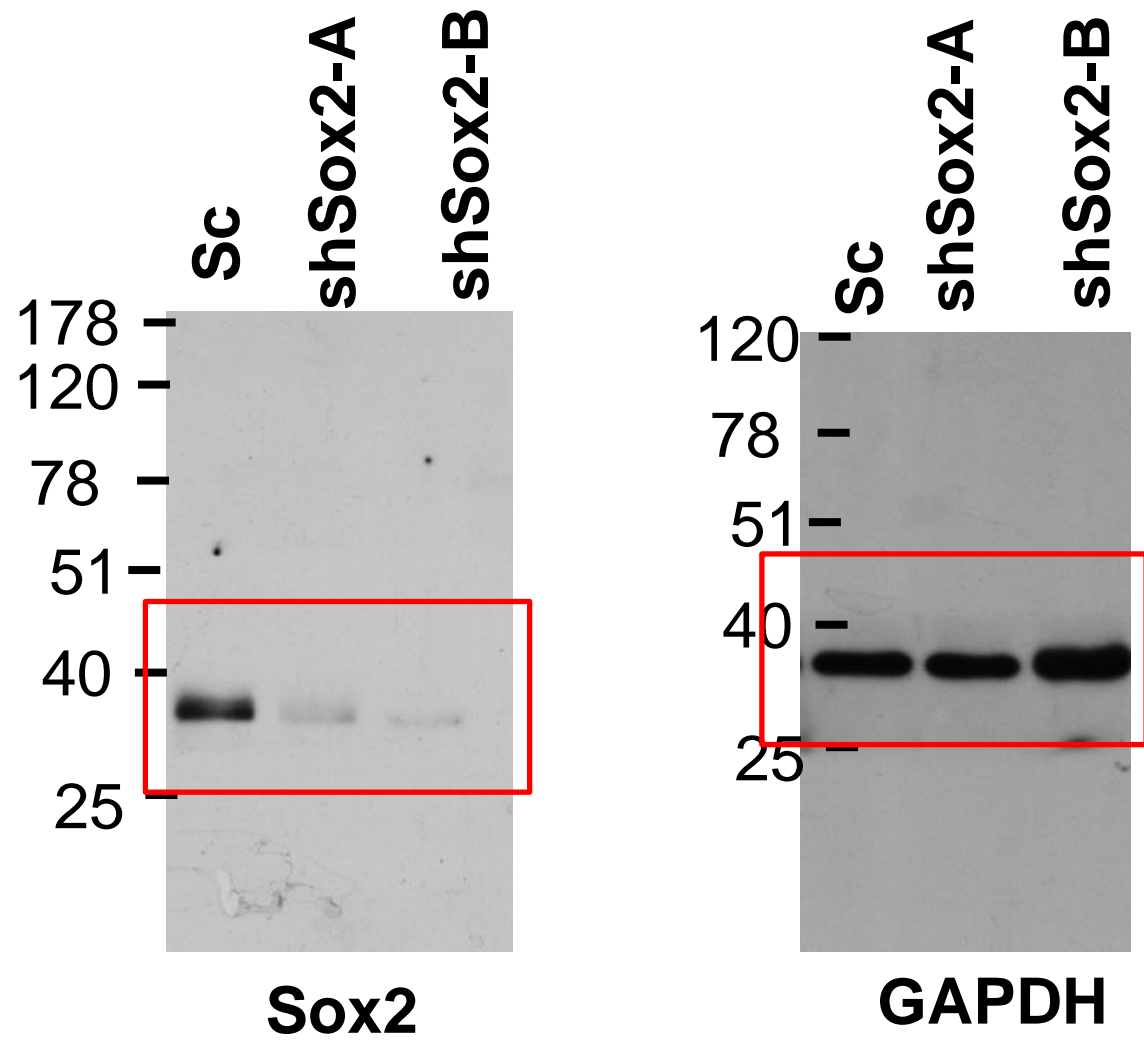

**Figure 2E**

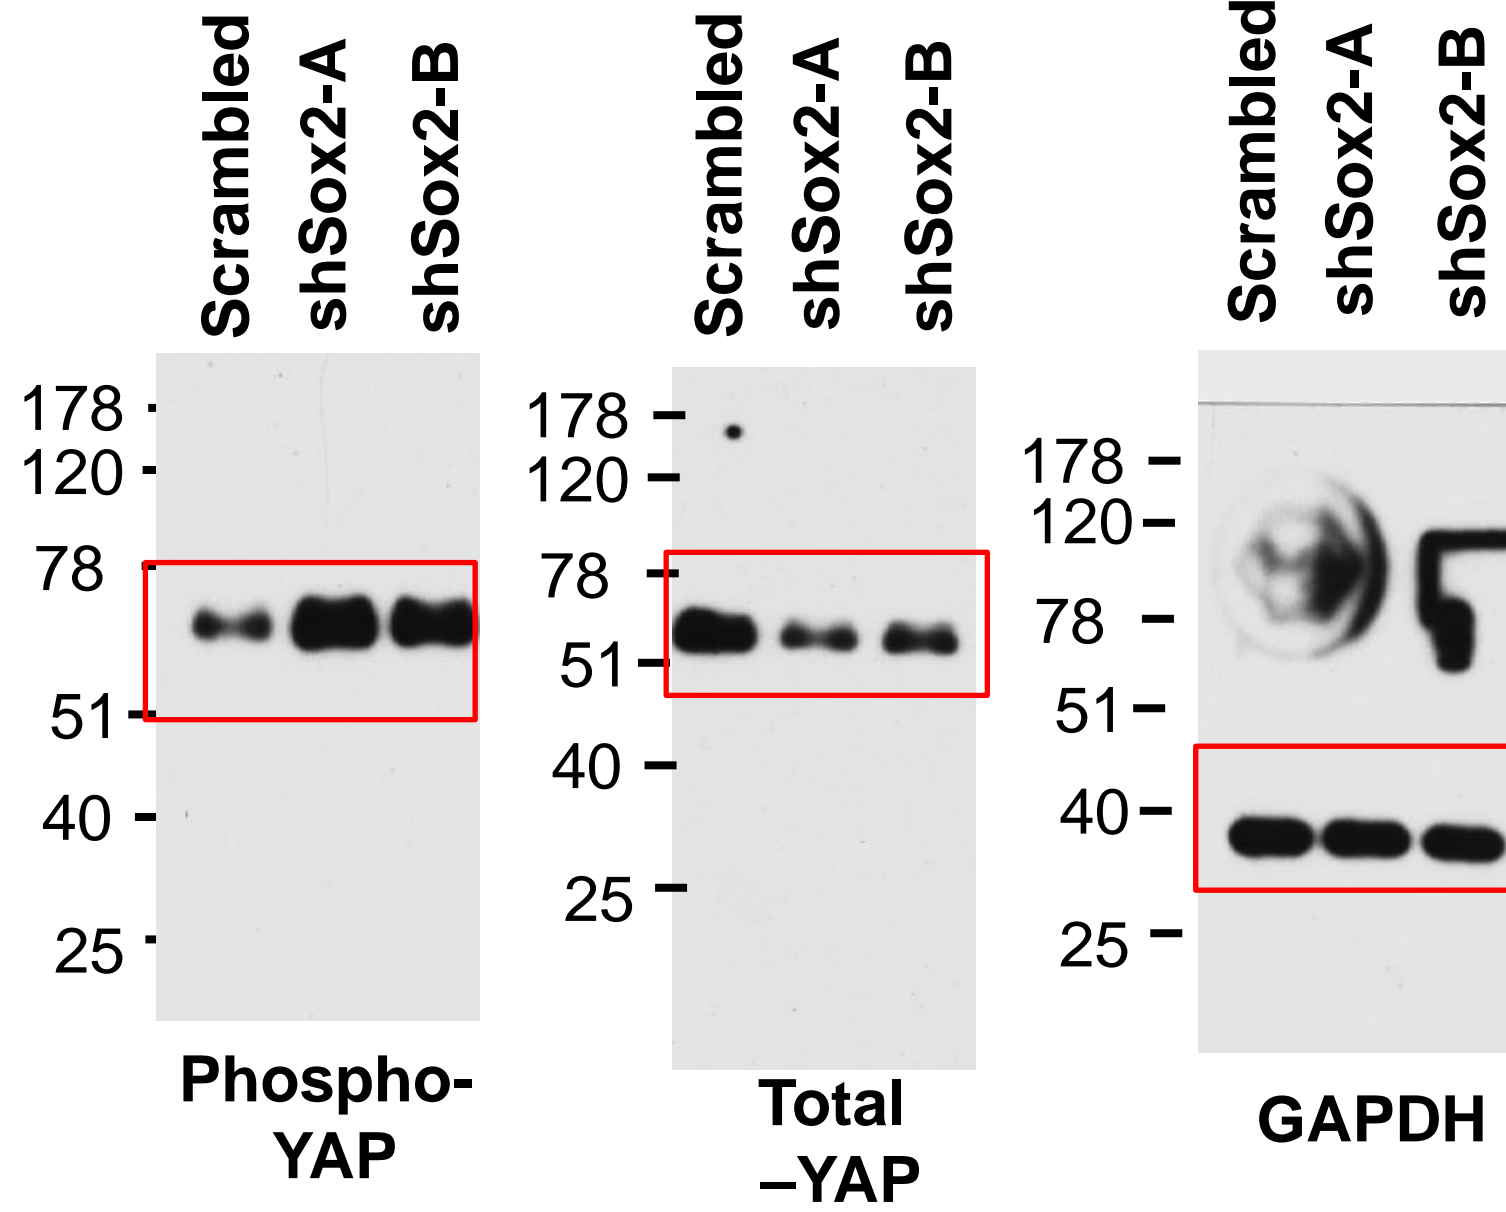

**Figure 2A – Left Panel**

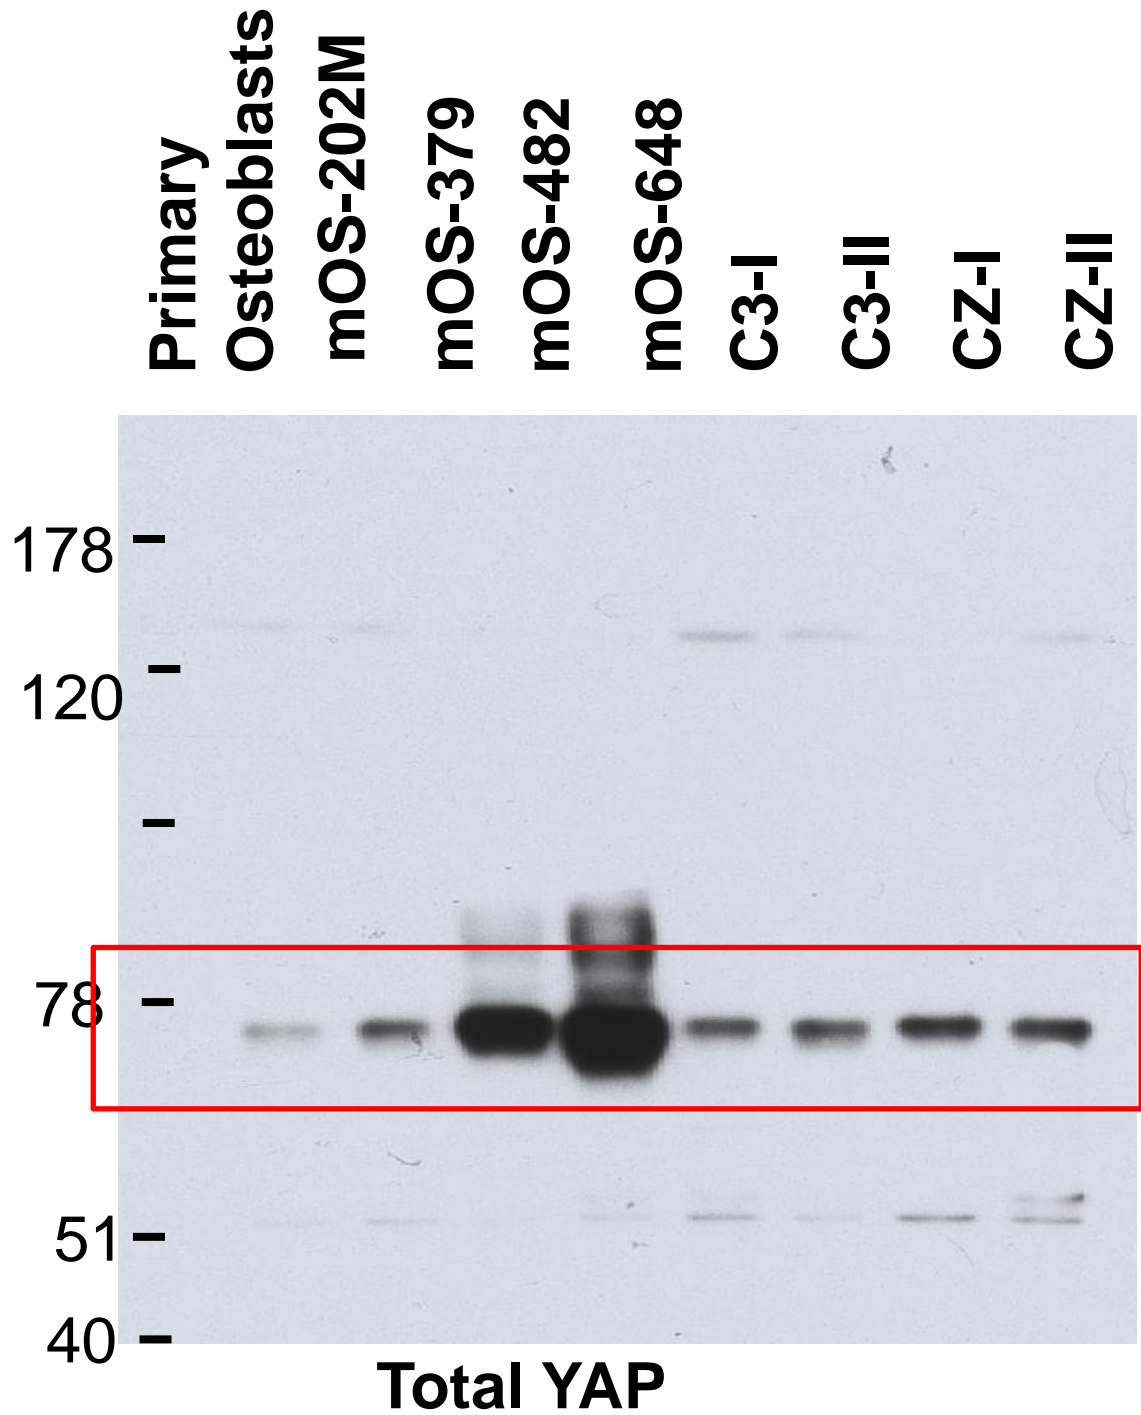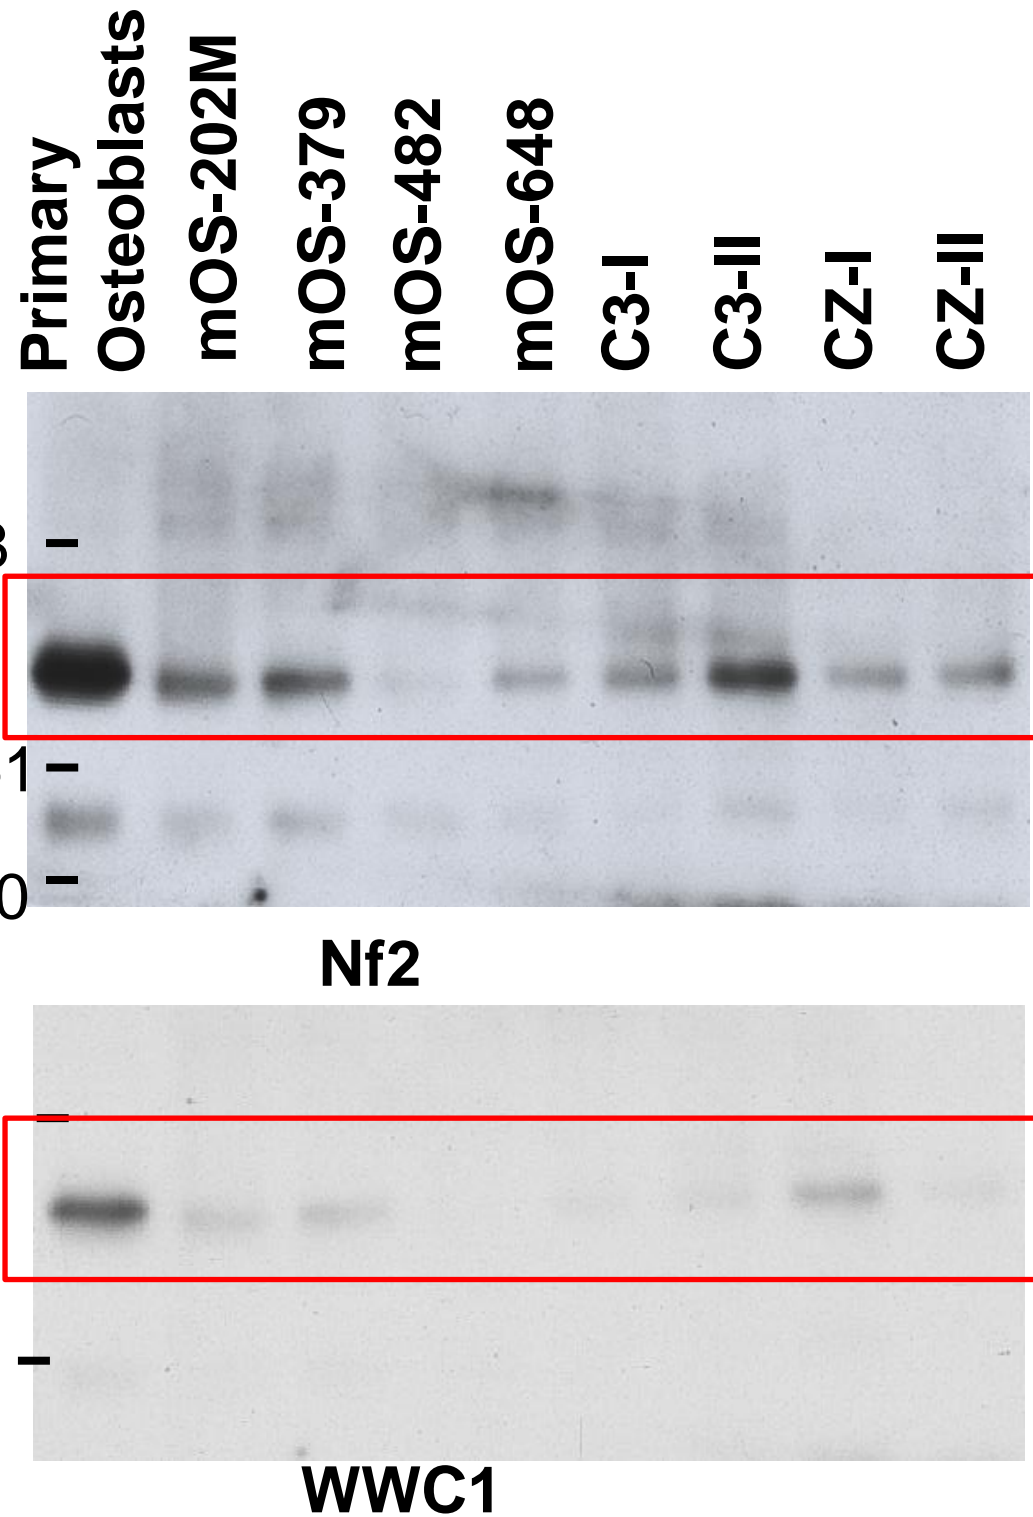

Figure 2A – Right Panel

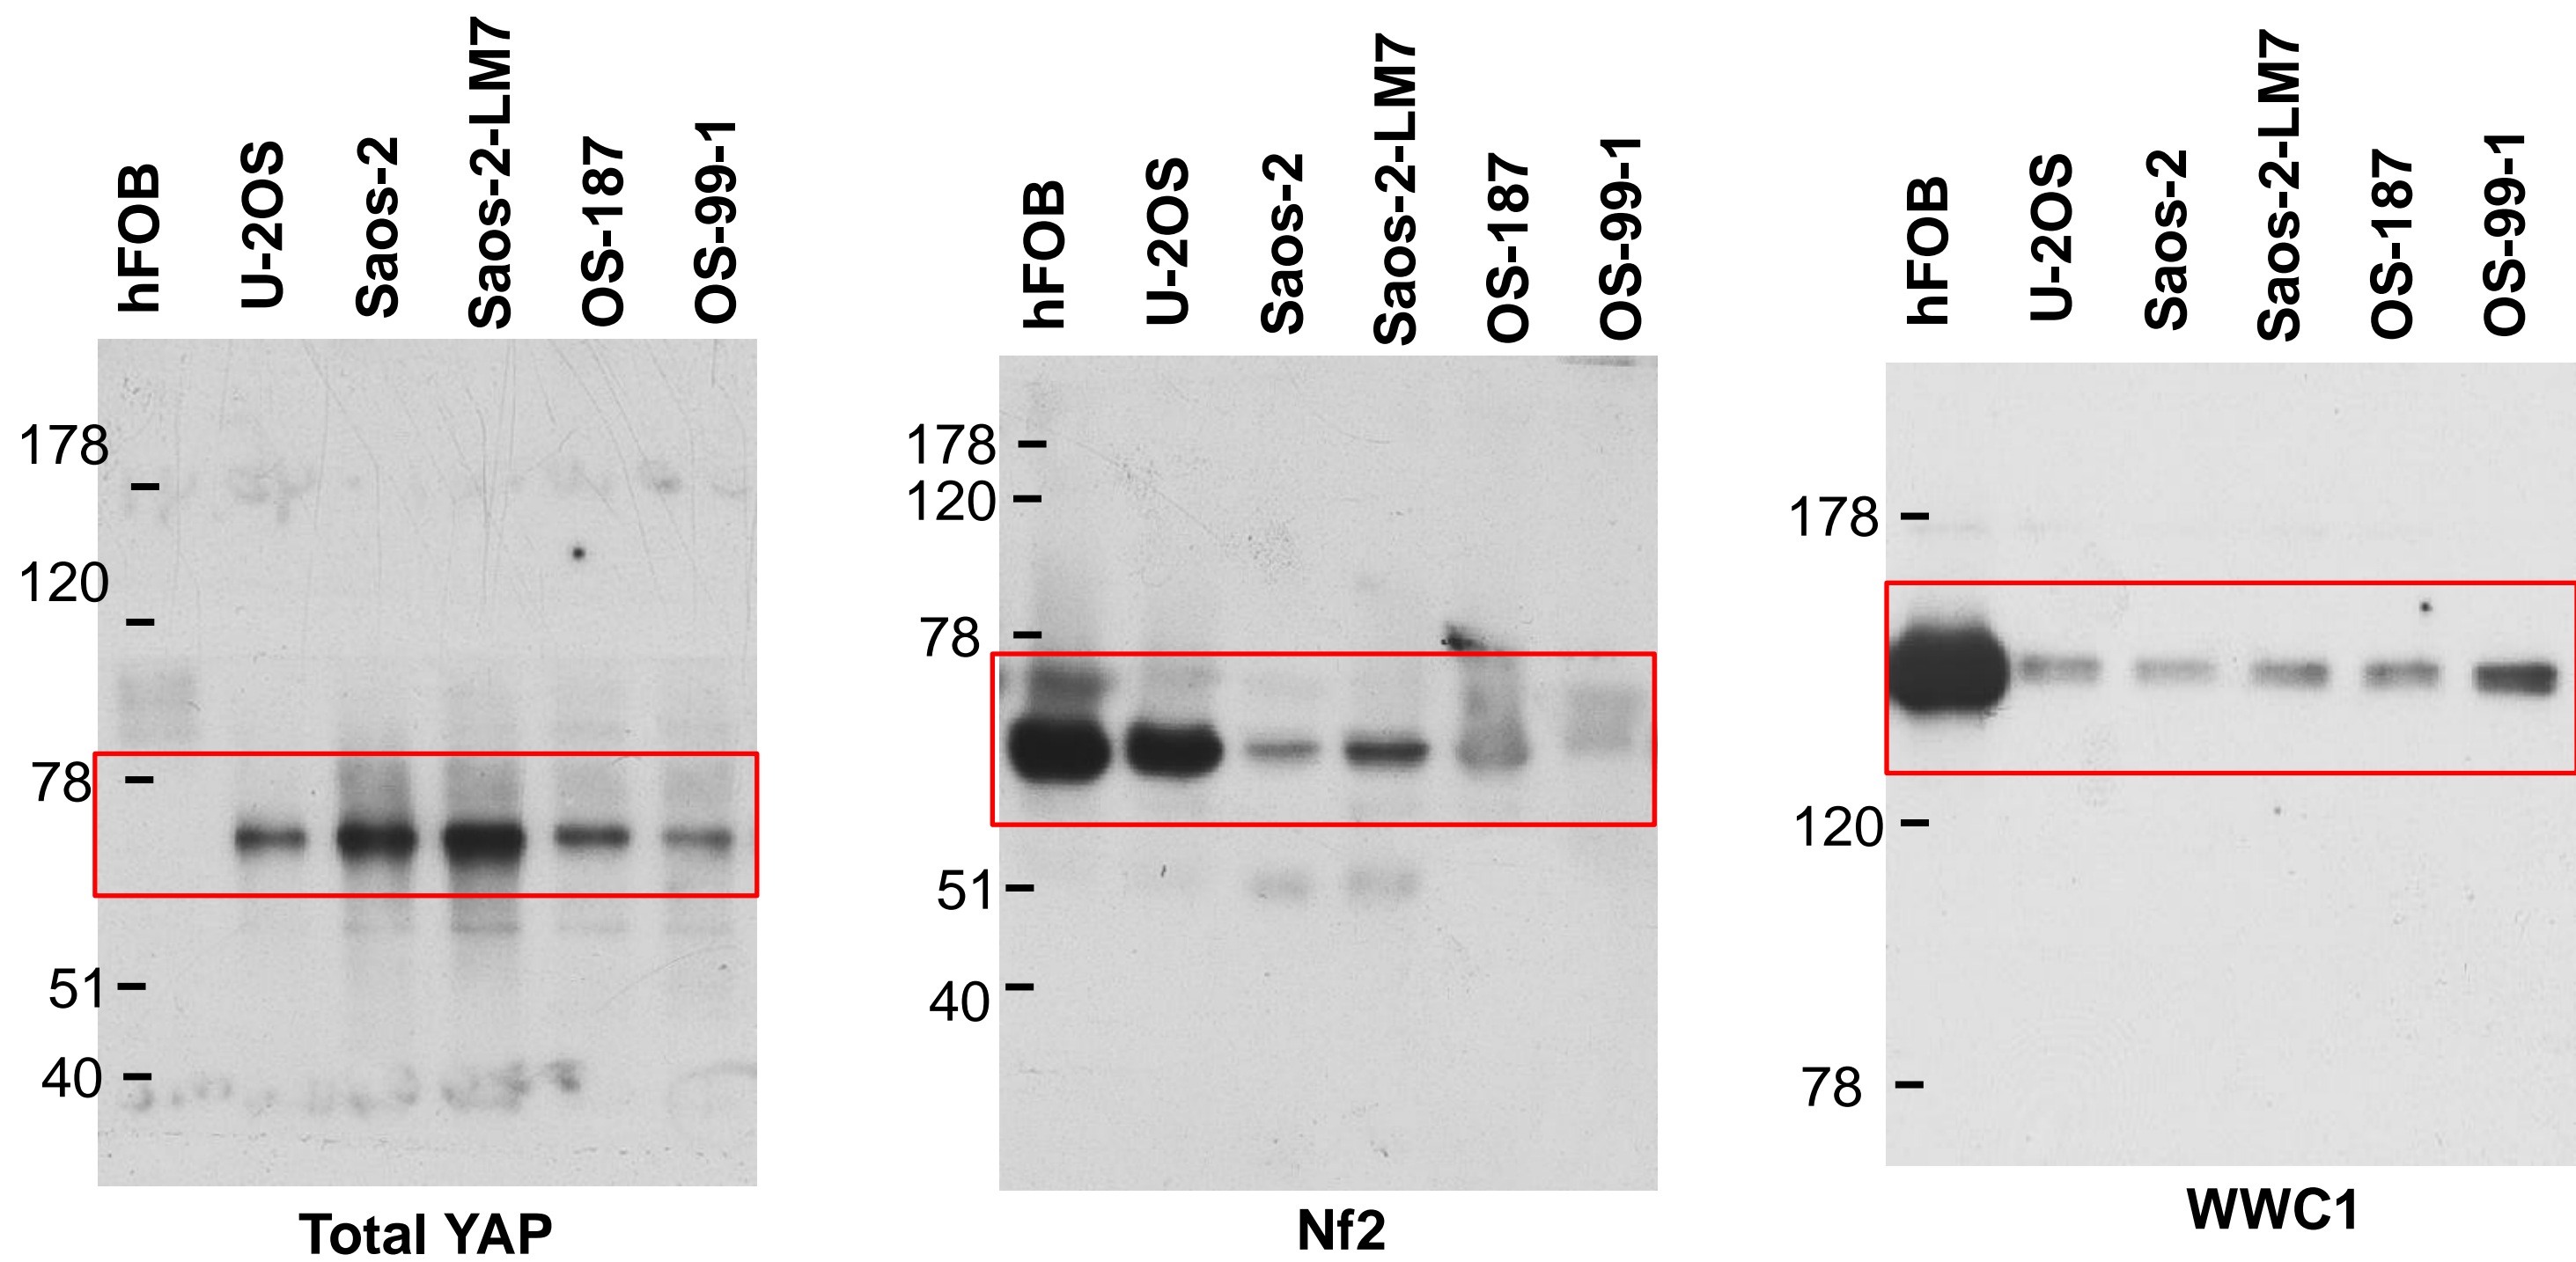

Figure 3A – Adherent and Sphere

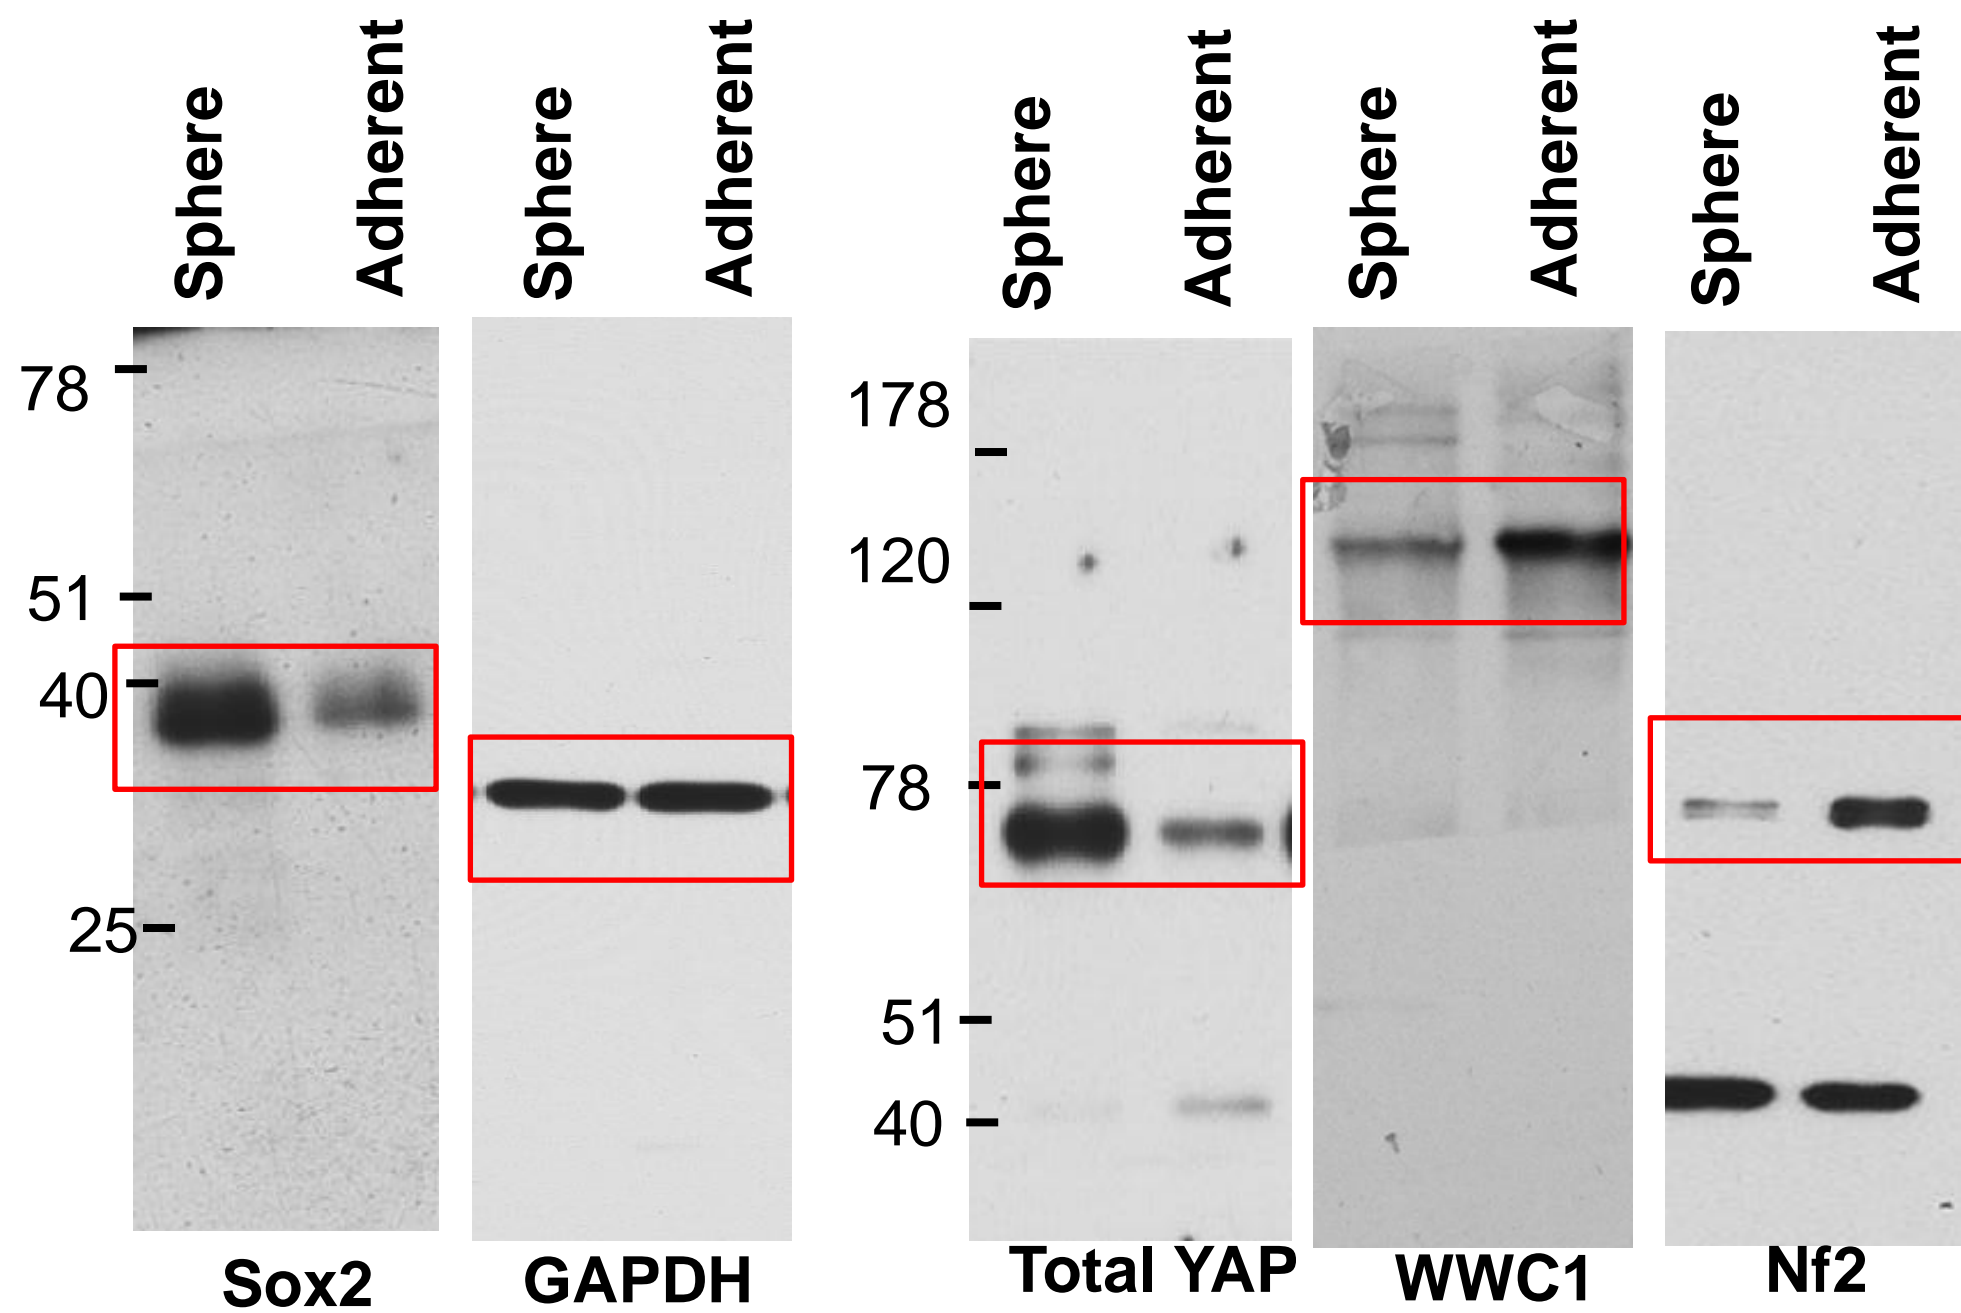

Figure 3A – Sca1<sup>High</sup>Sox2<sup>High</sup> and Sca1<sup>Low</sup>Sox2<sup>Low</sup>

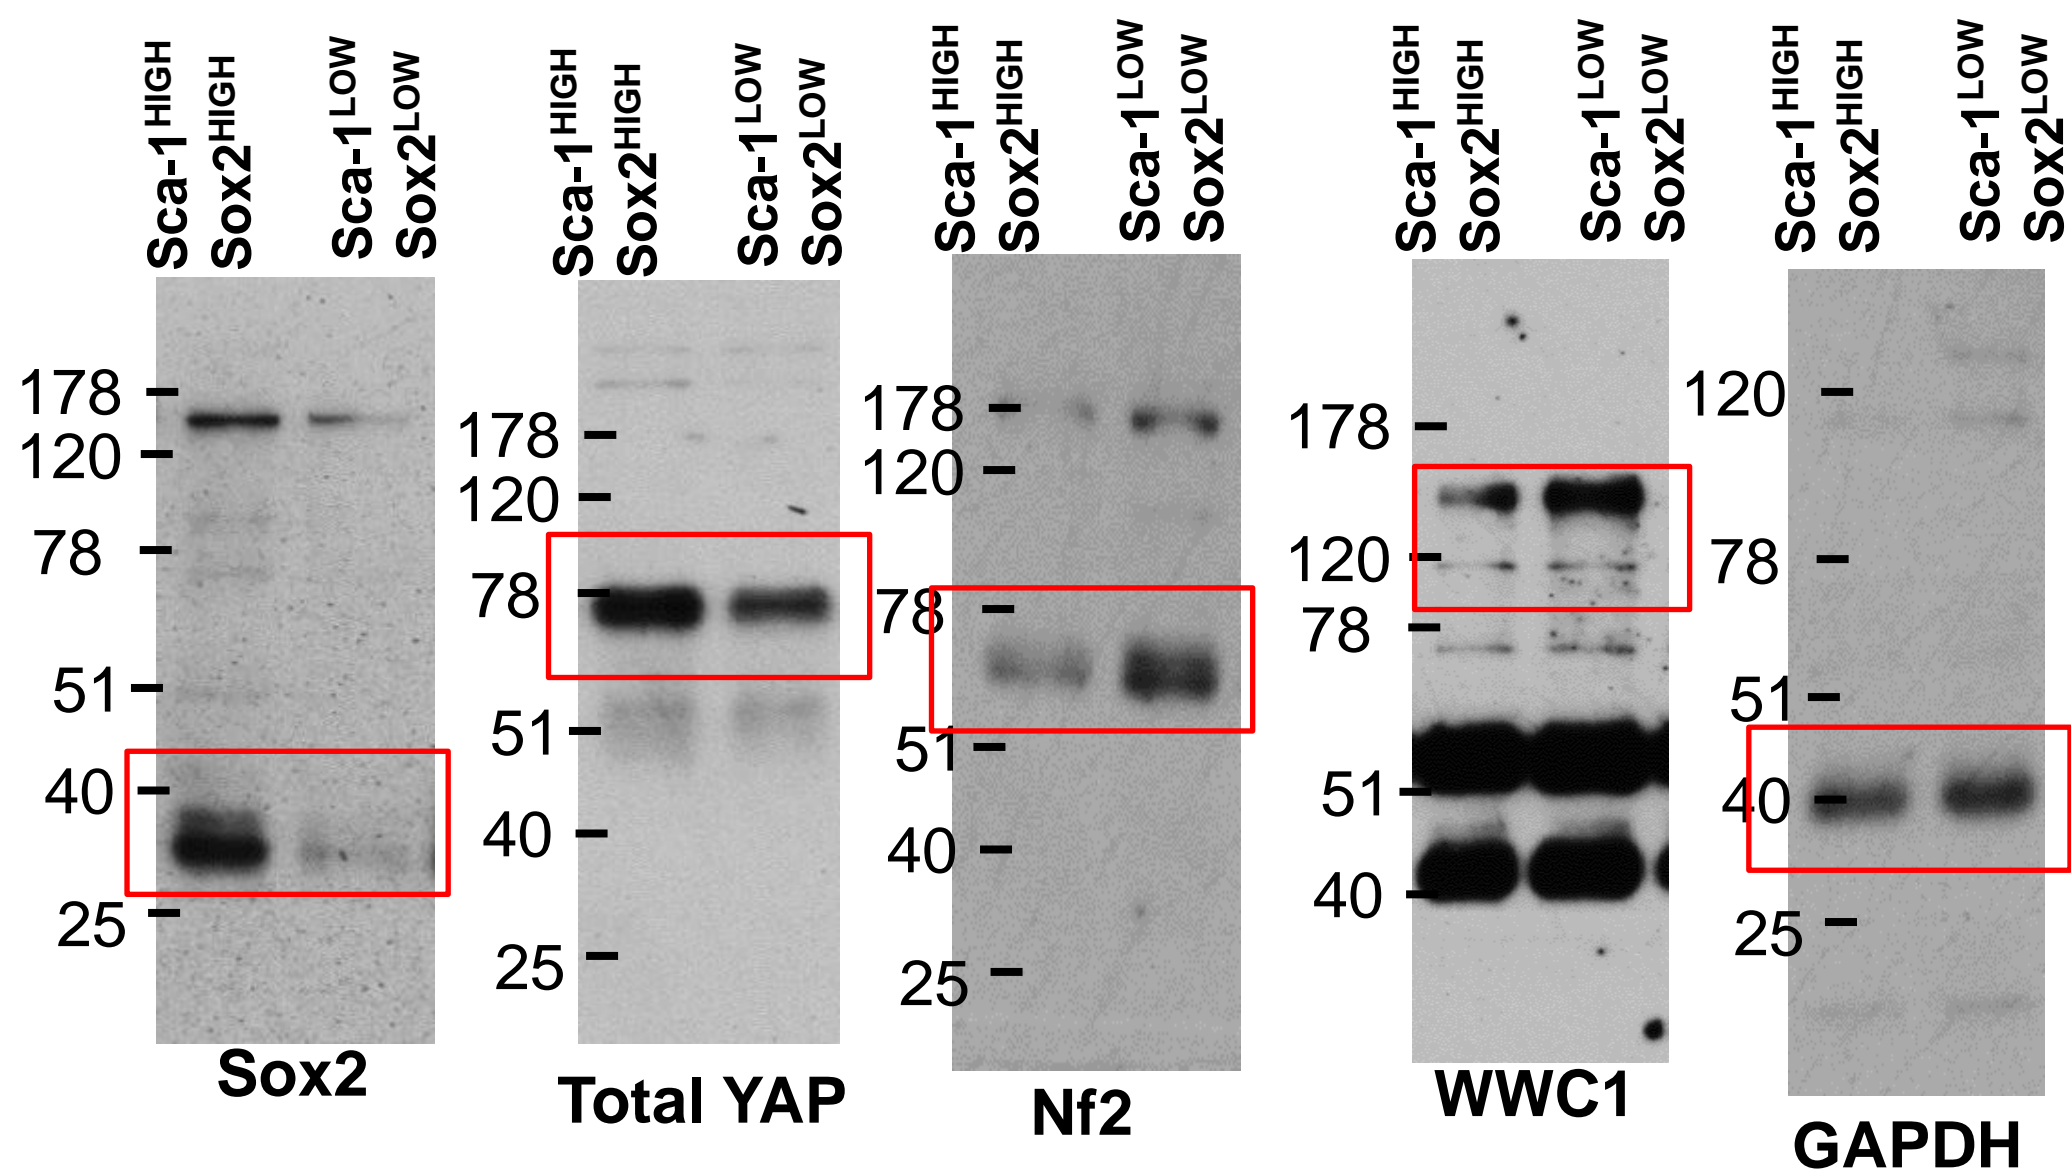

Figure 3B

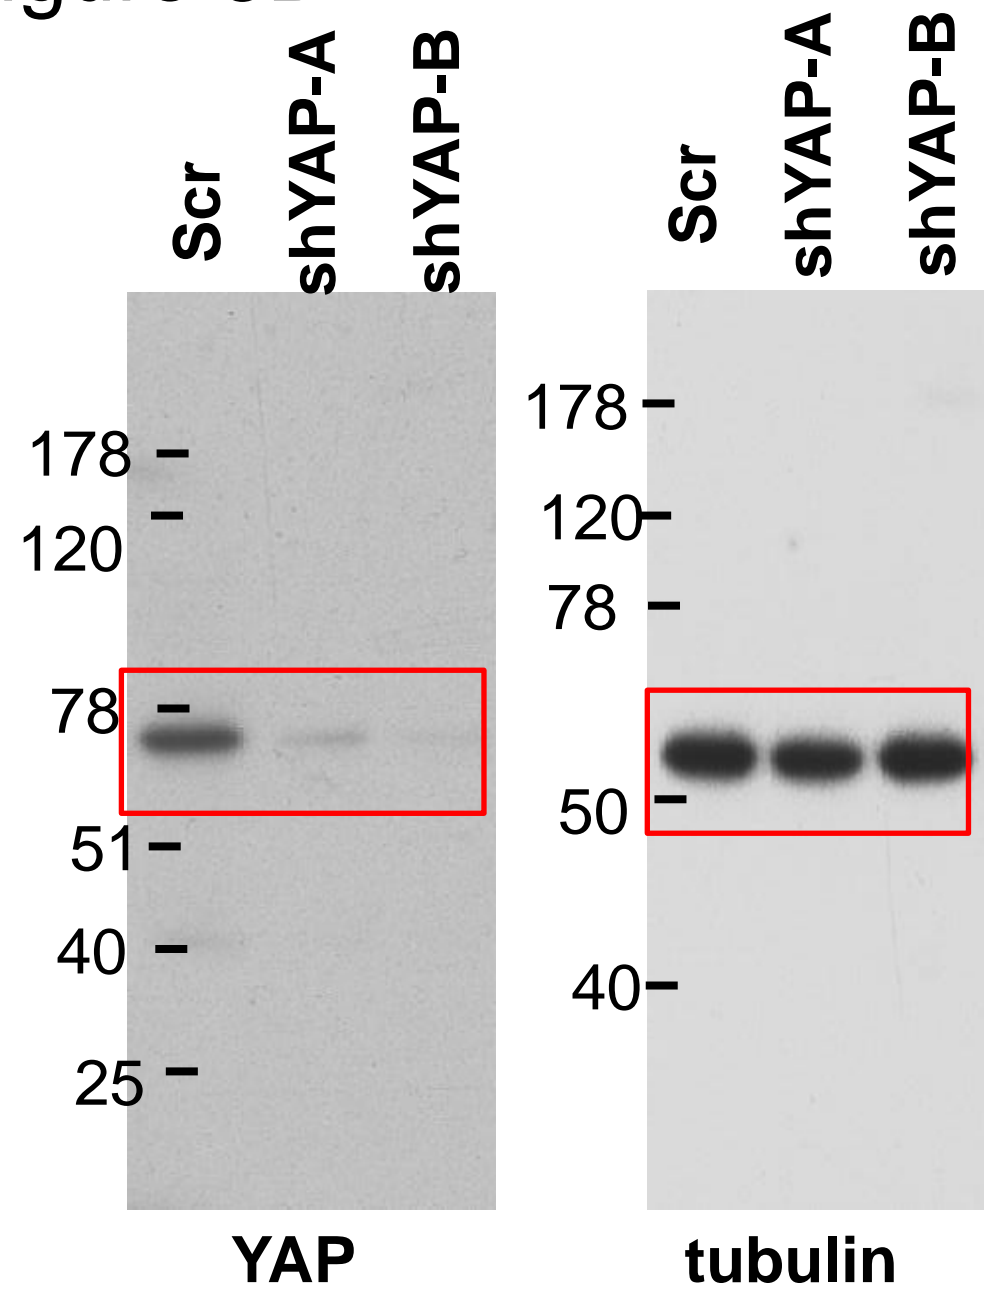

Figure 4A

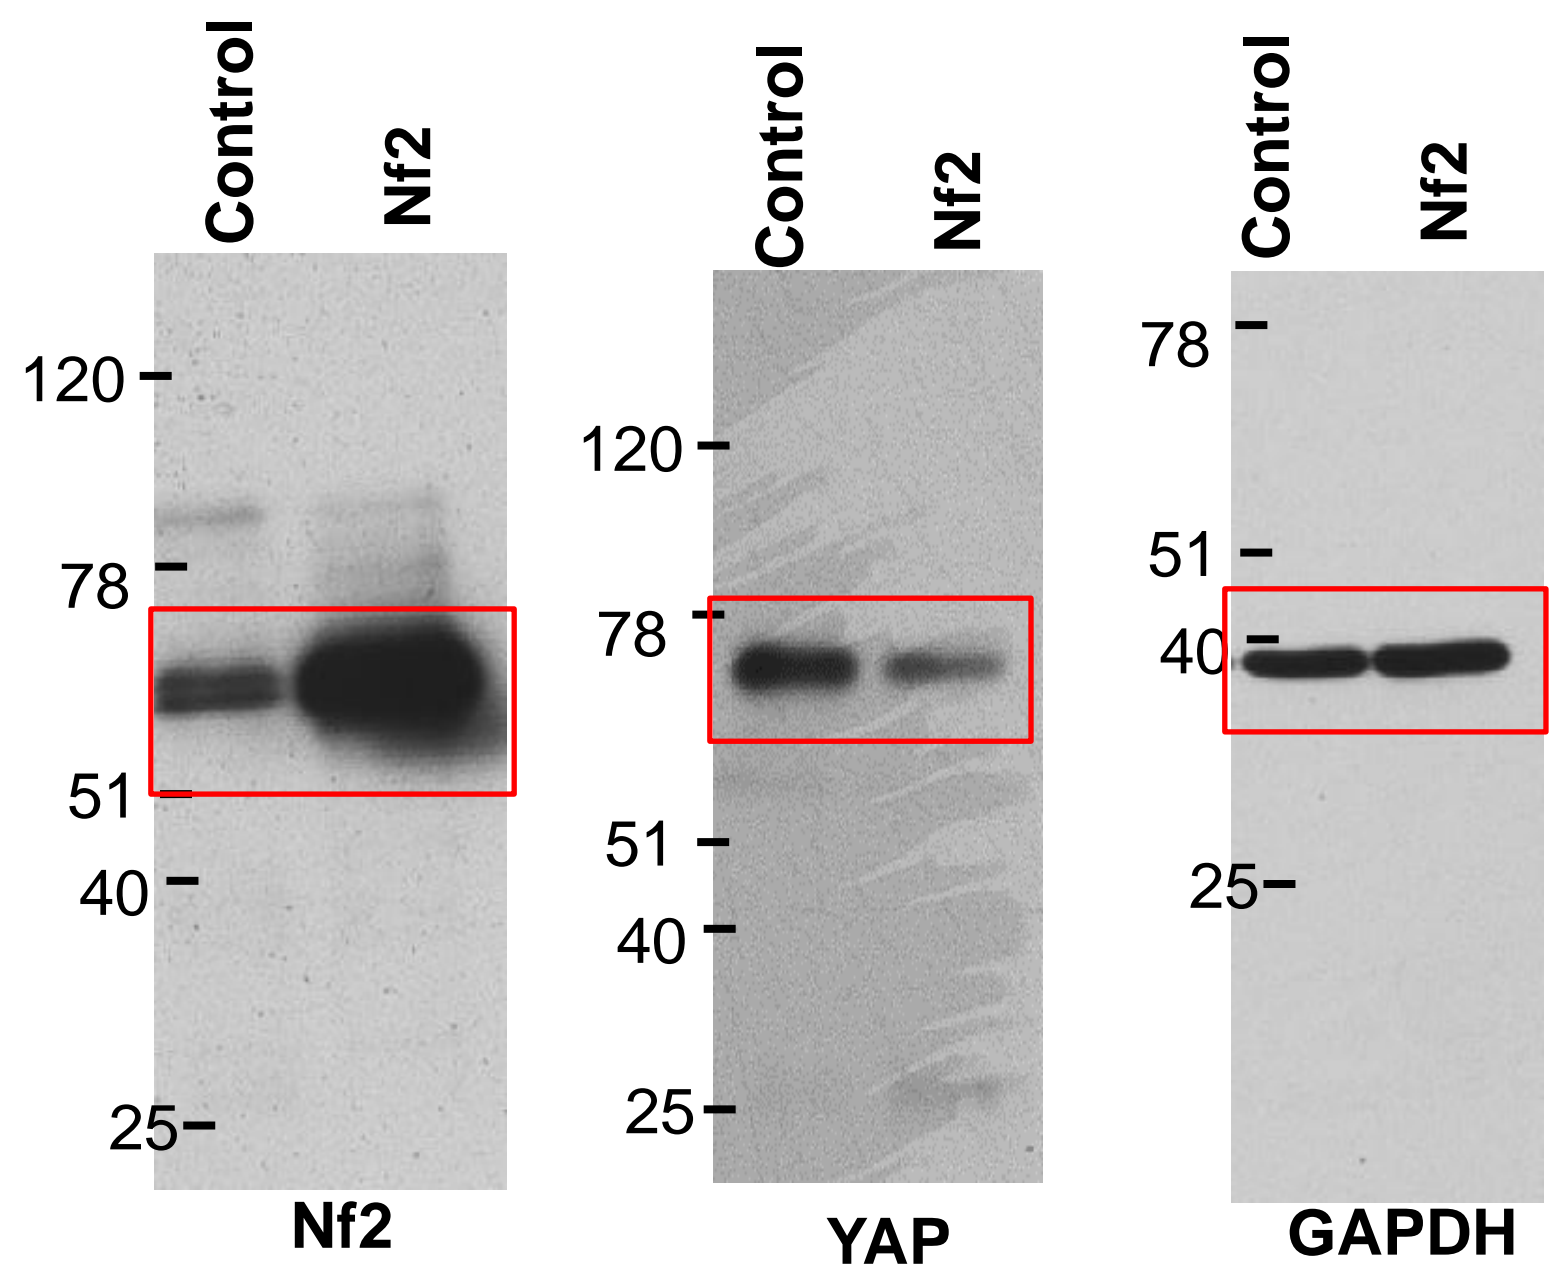

Figure 4B

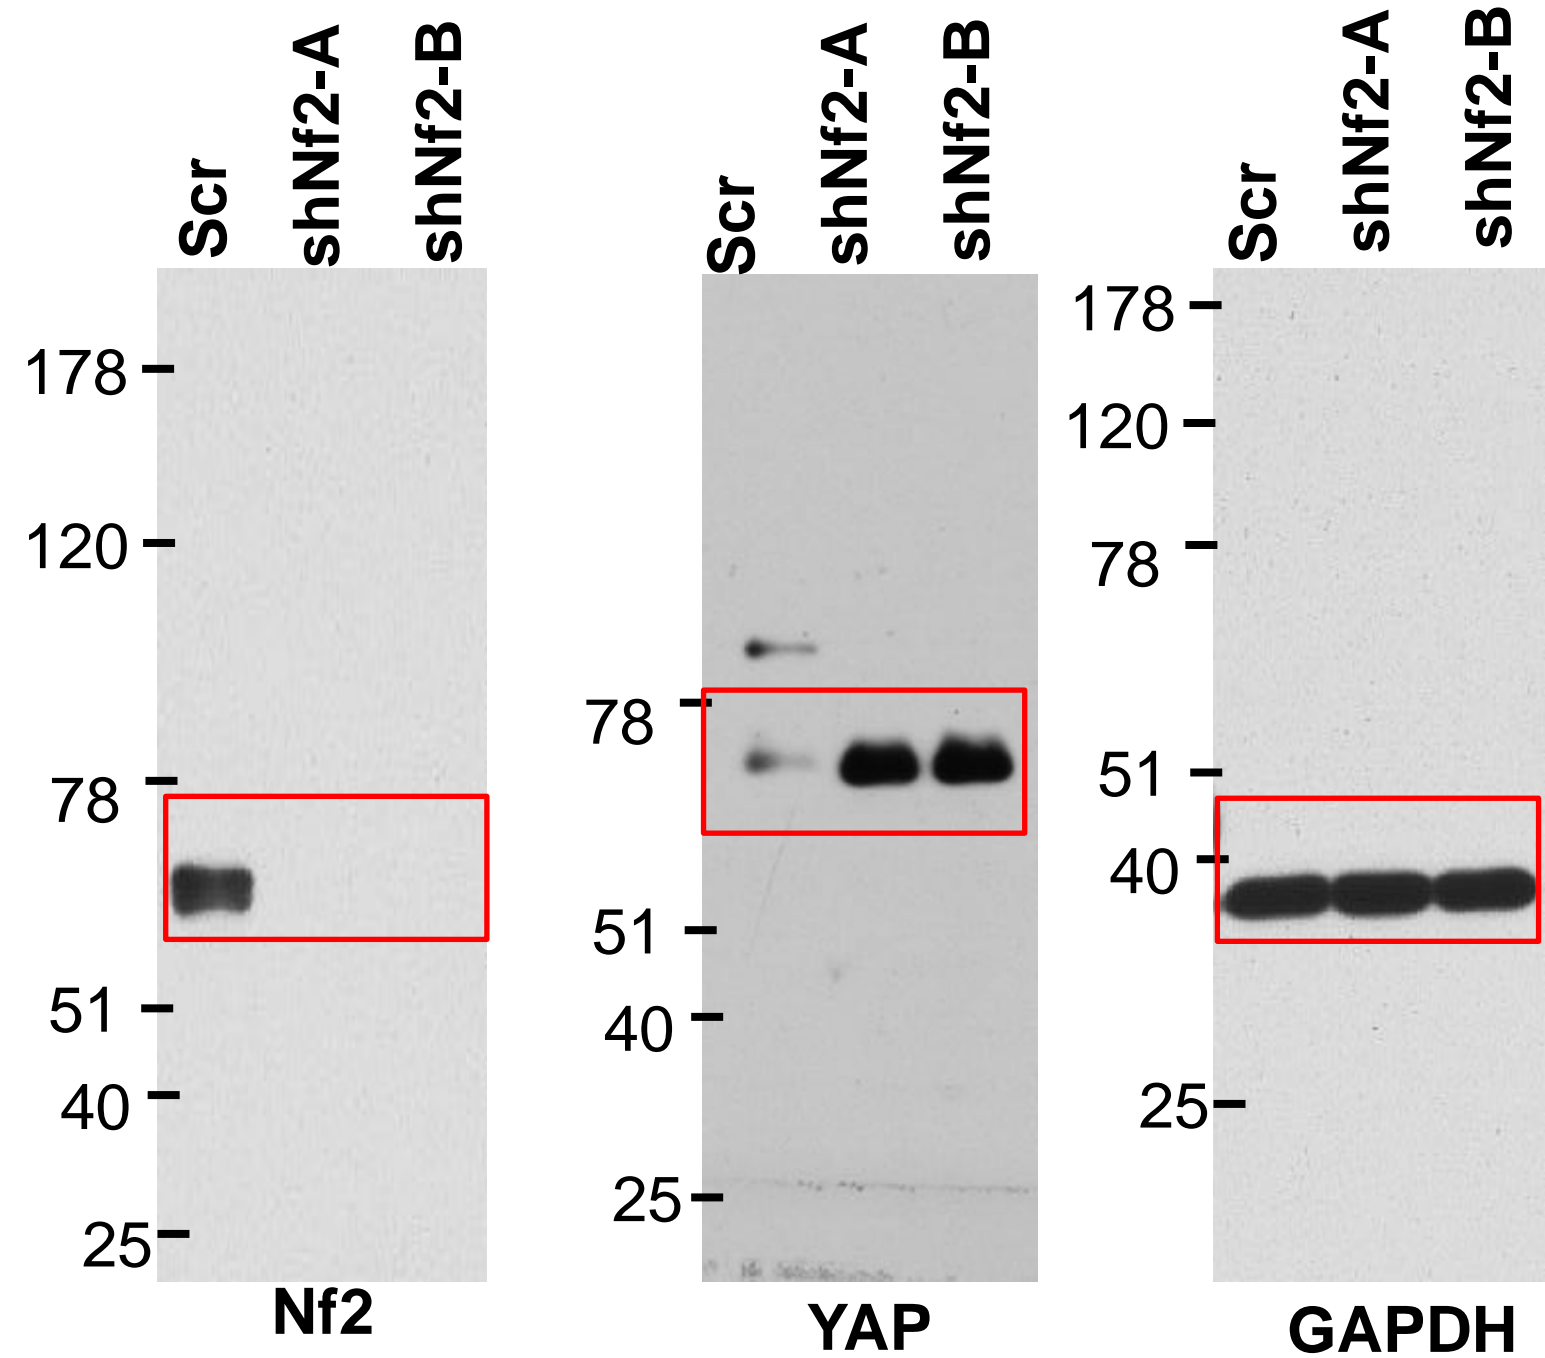

Figure 4C

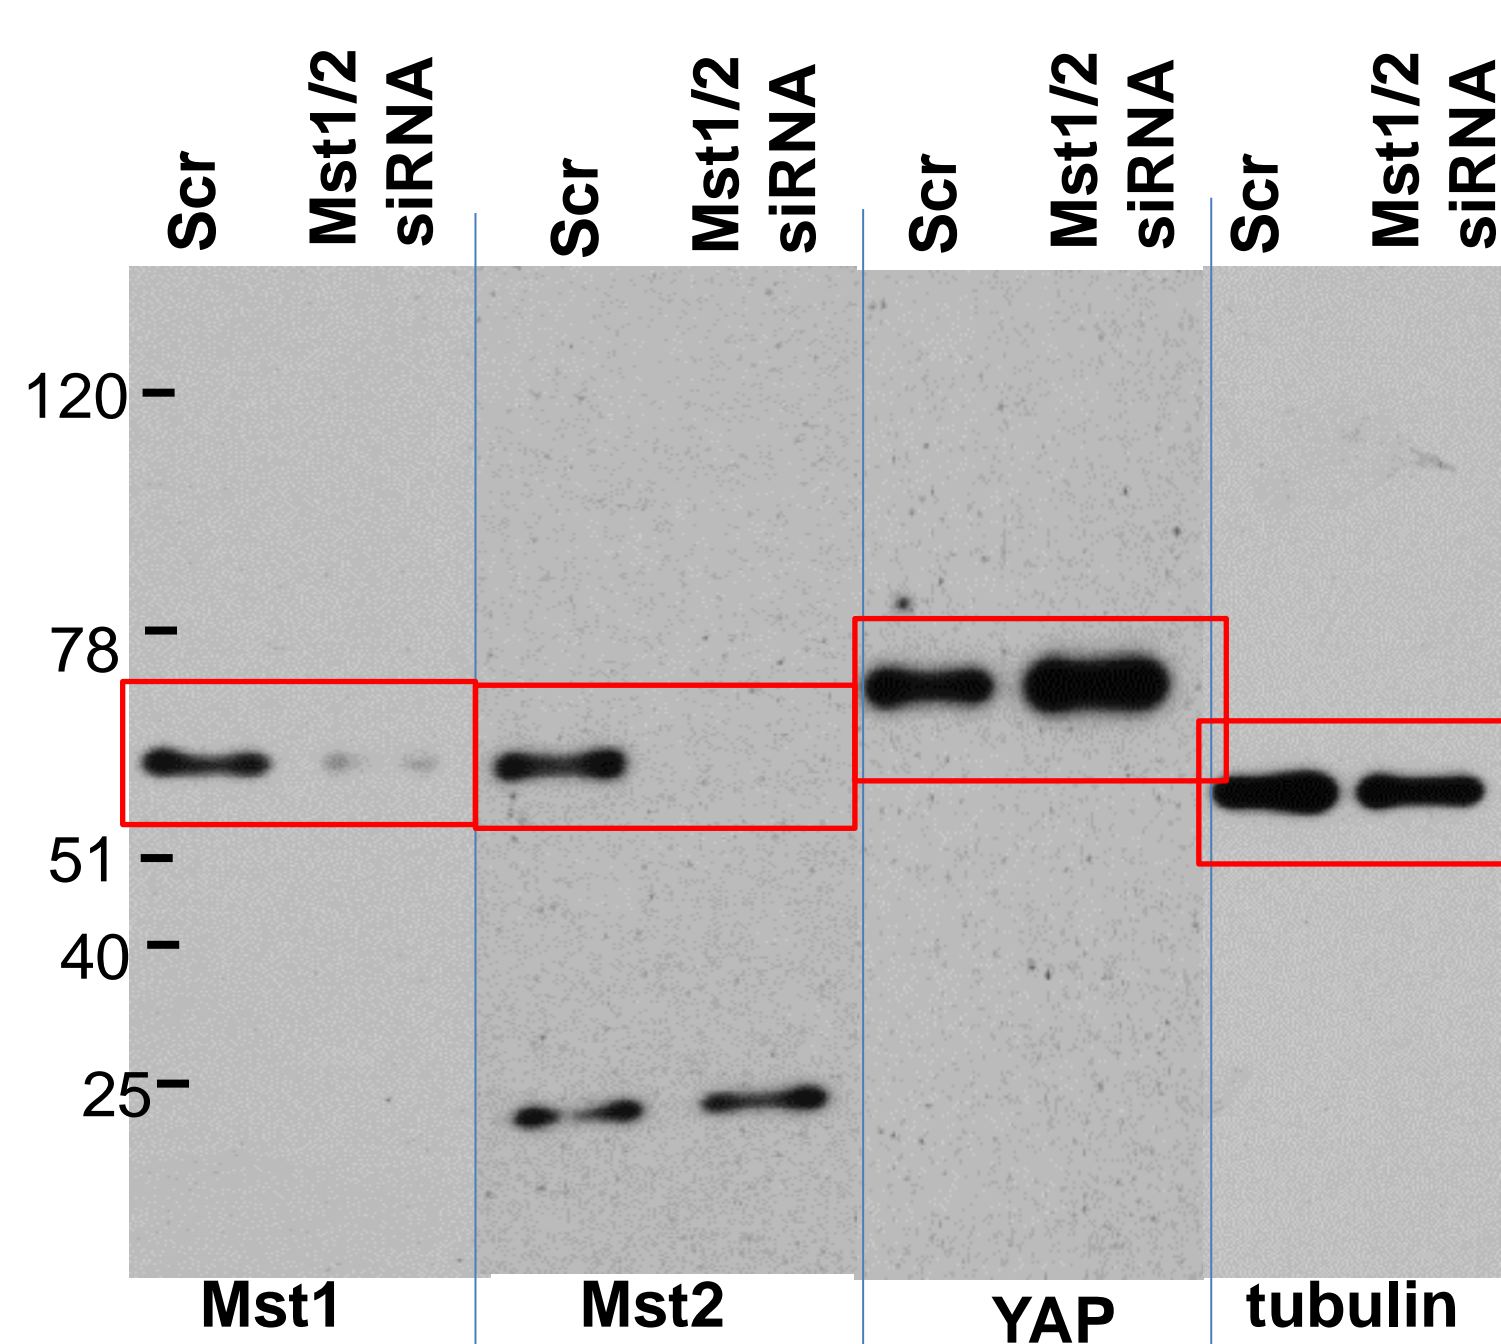

Figure 4C-Continued

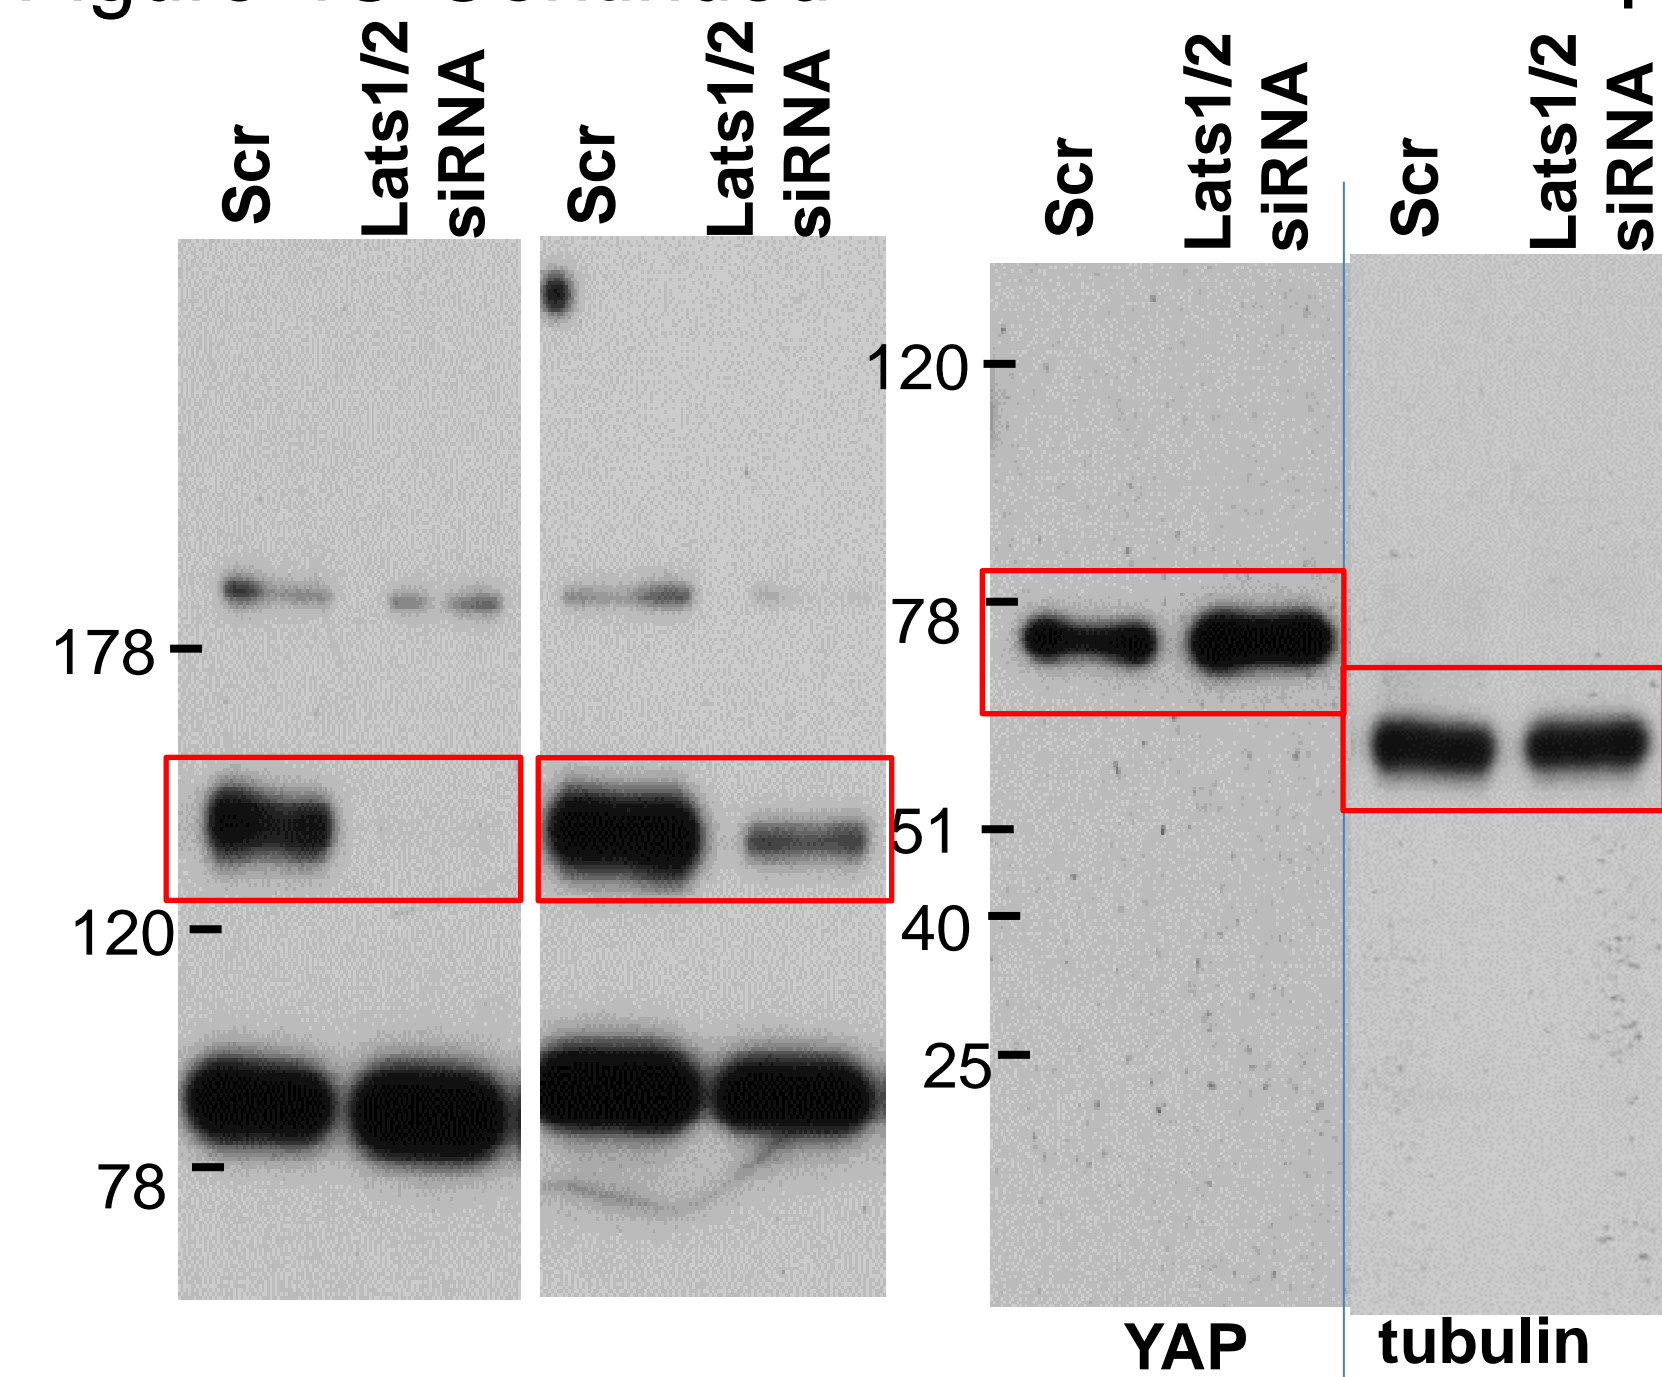

Figure 4D

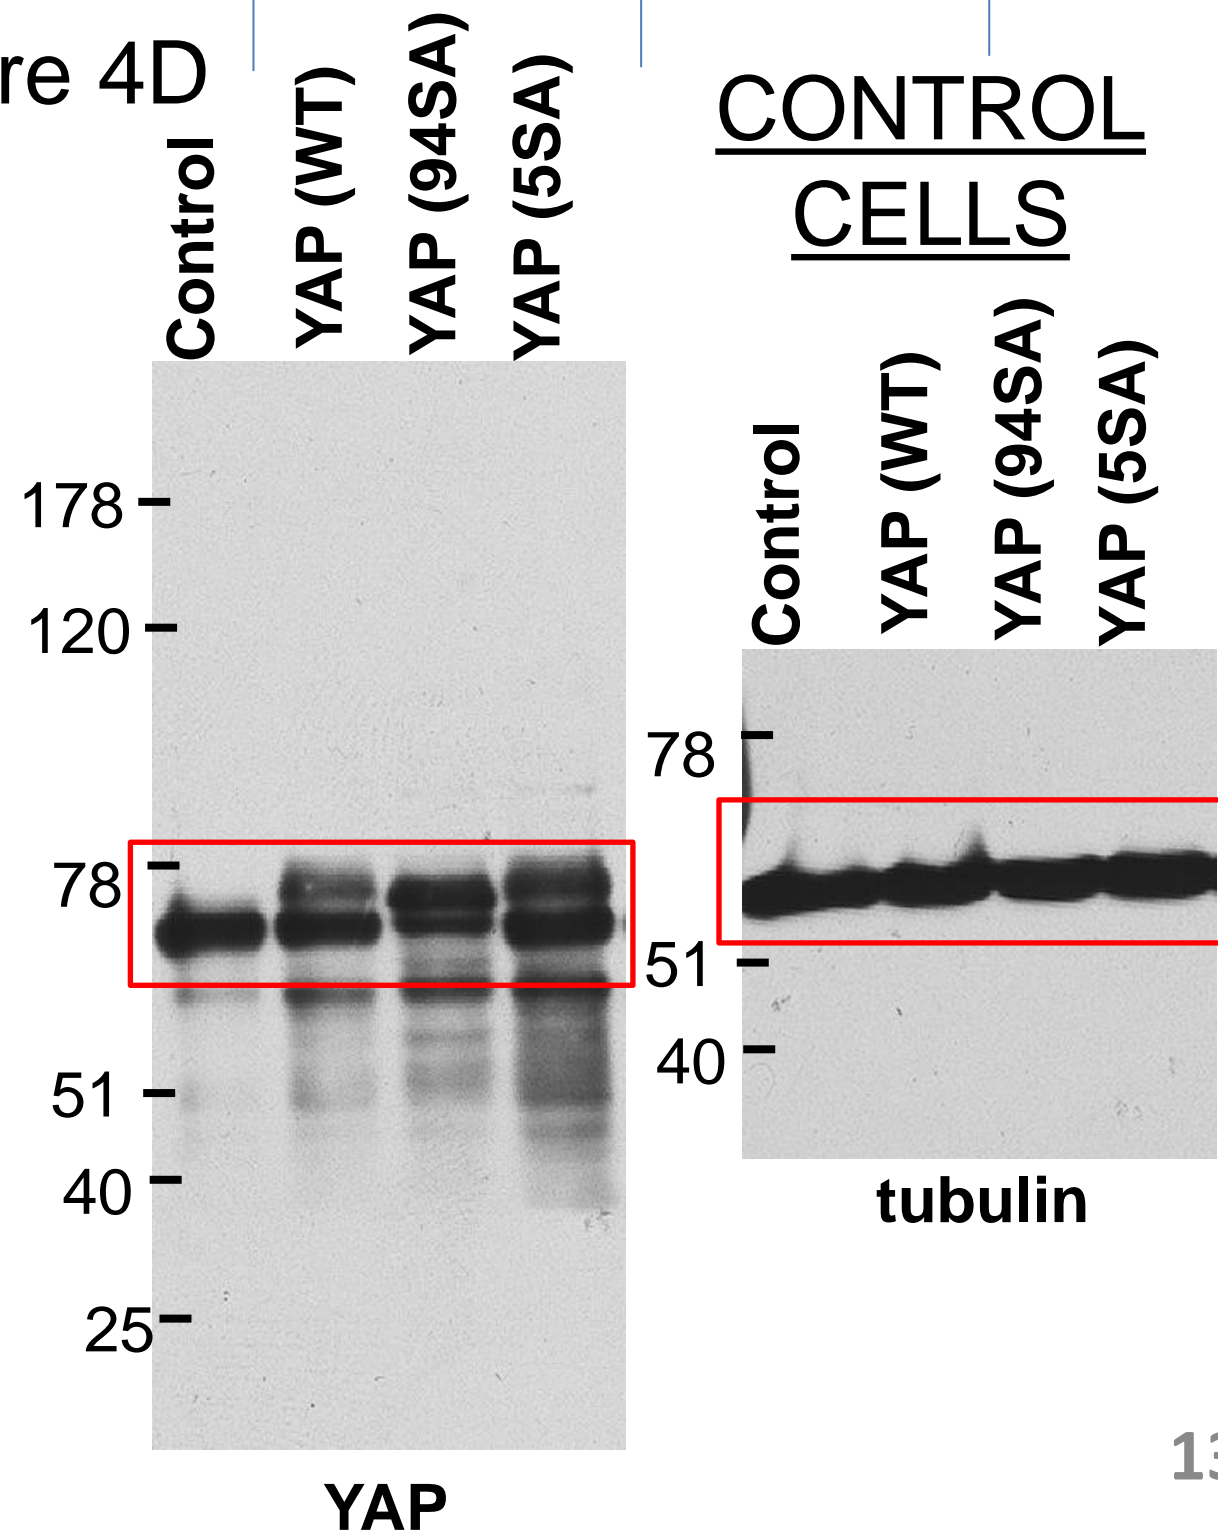

Figure 4D- Continued

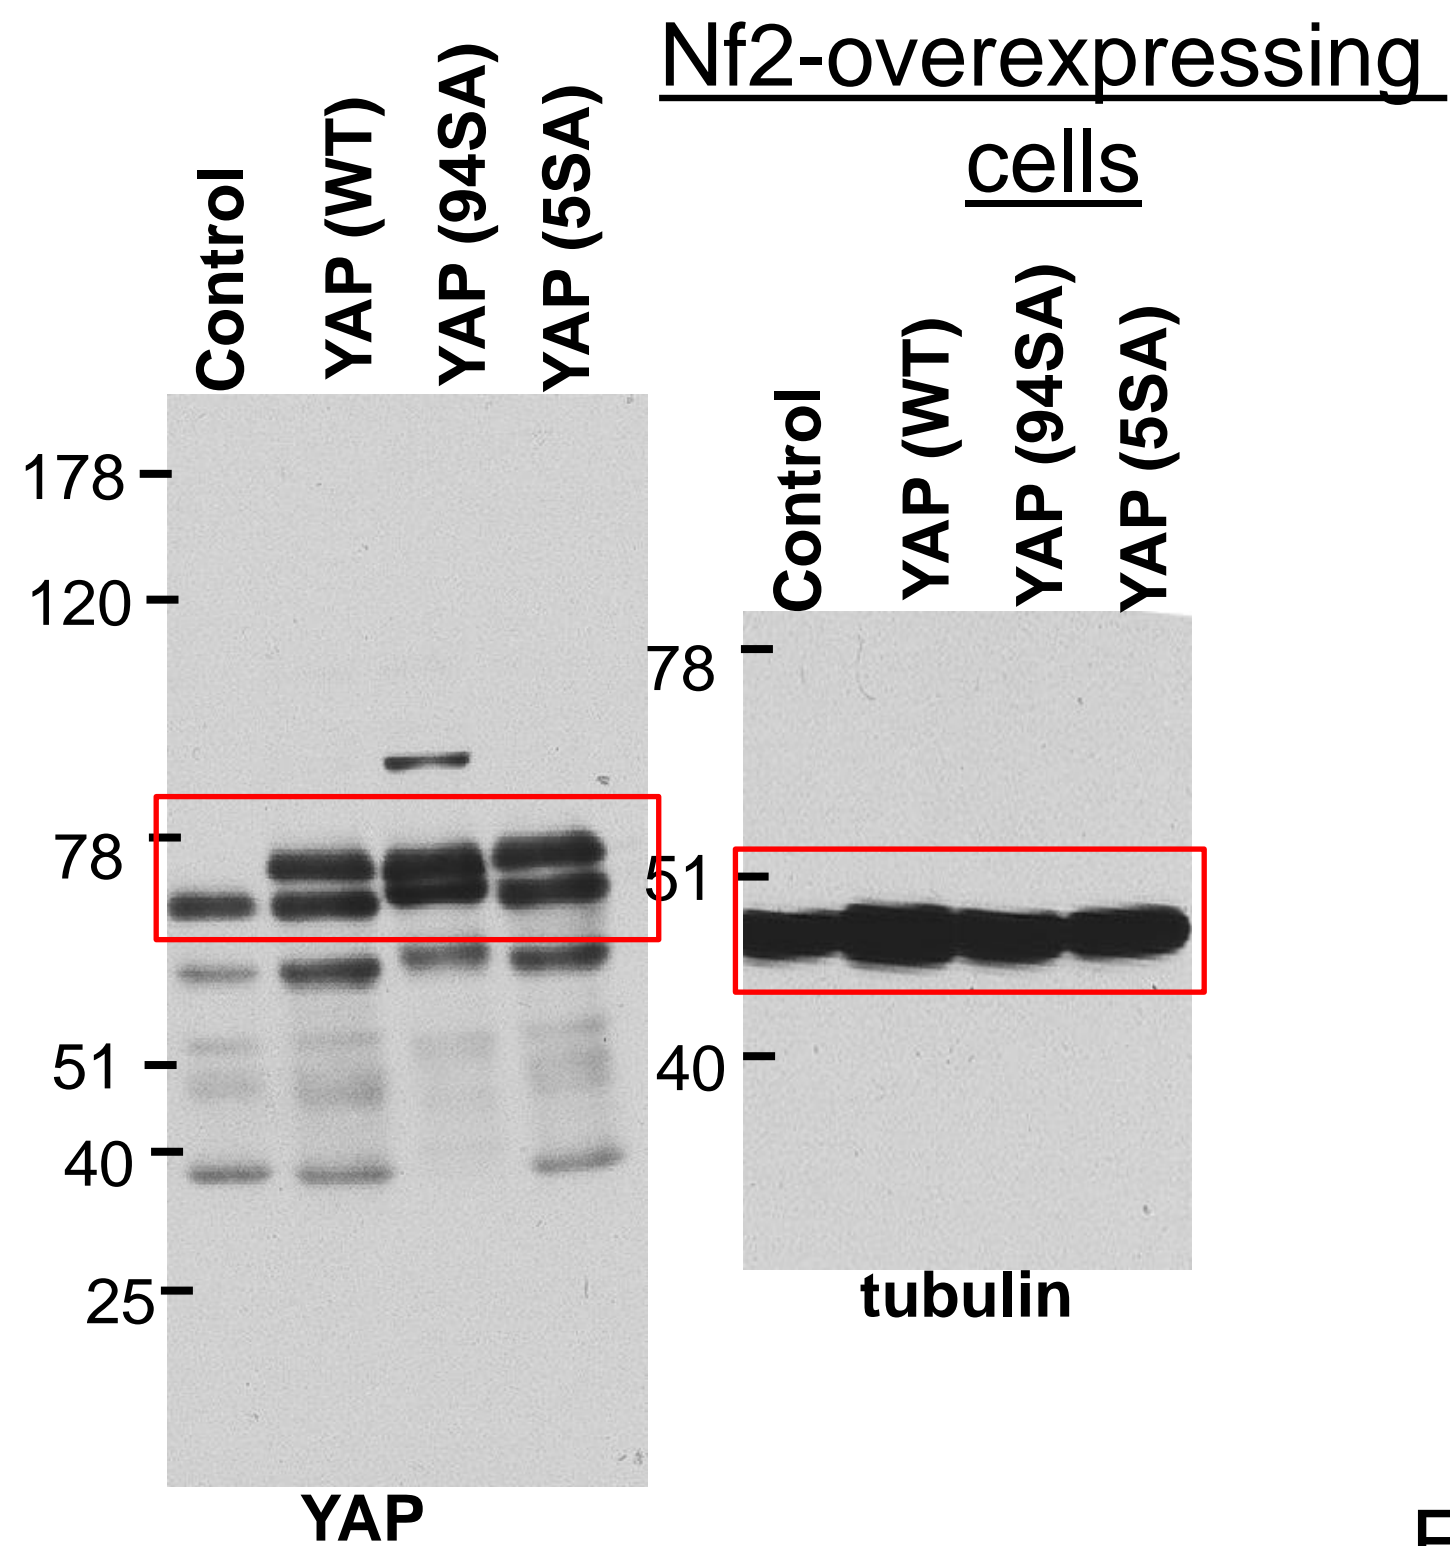

Figure 5A

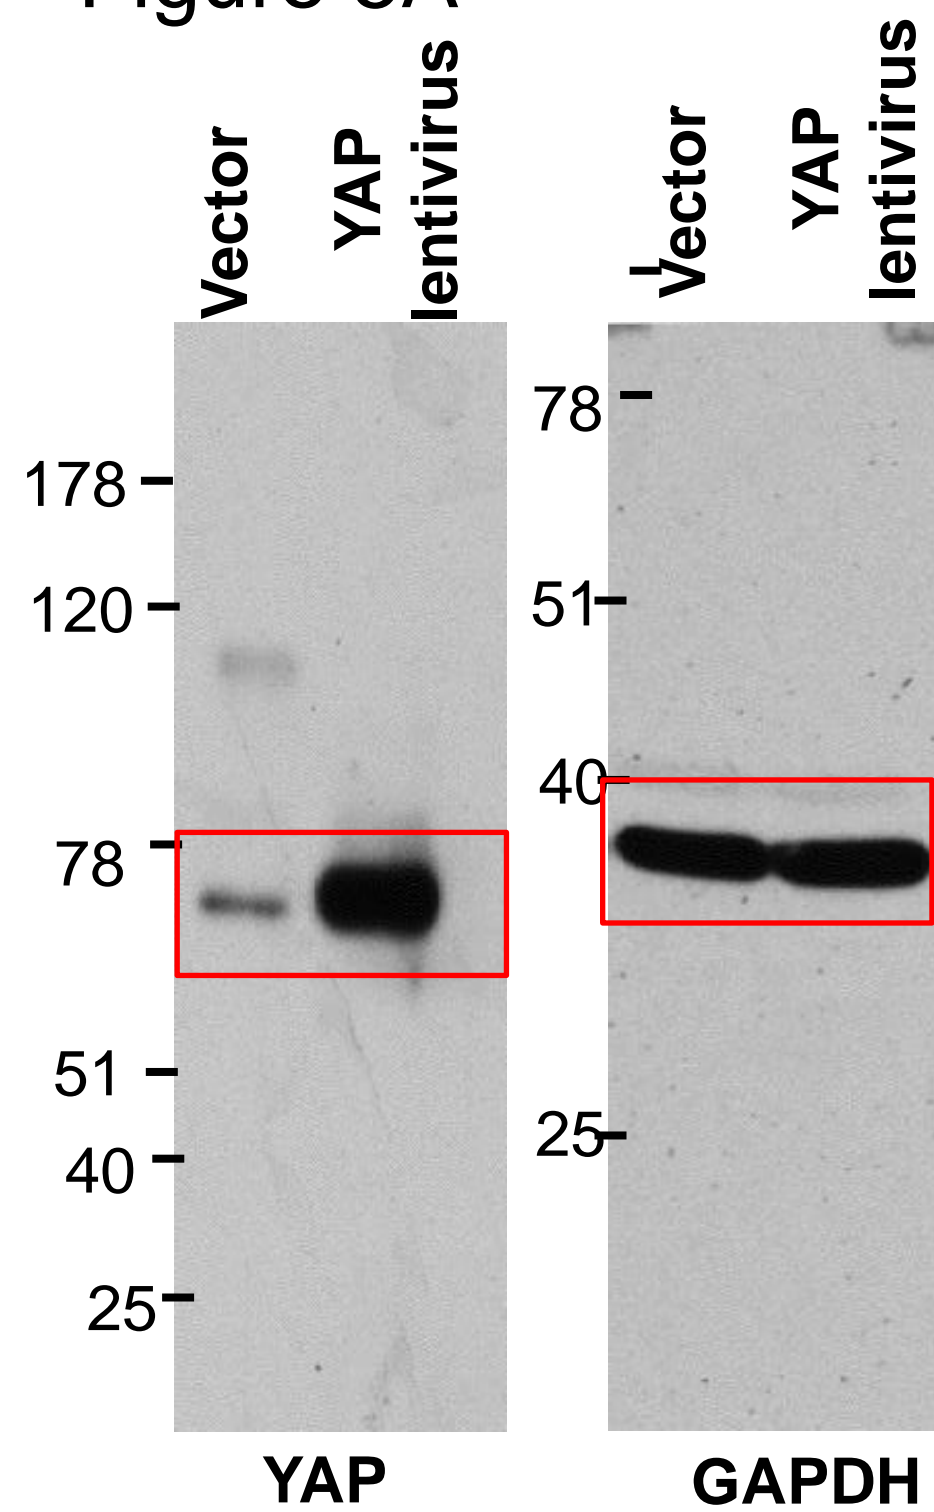

Figure 5B

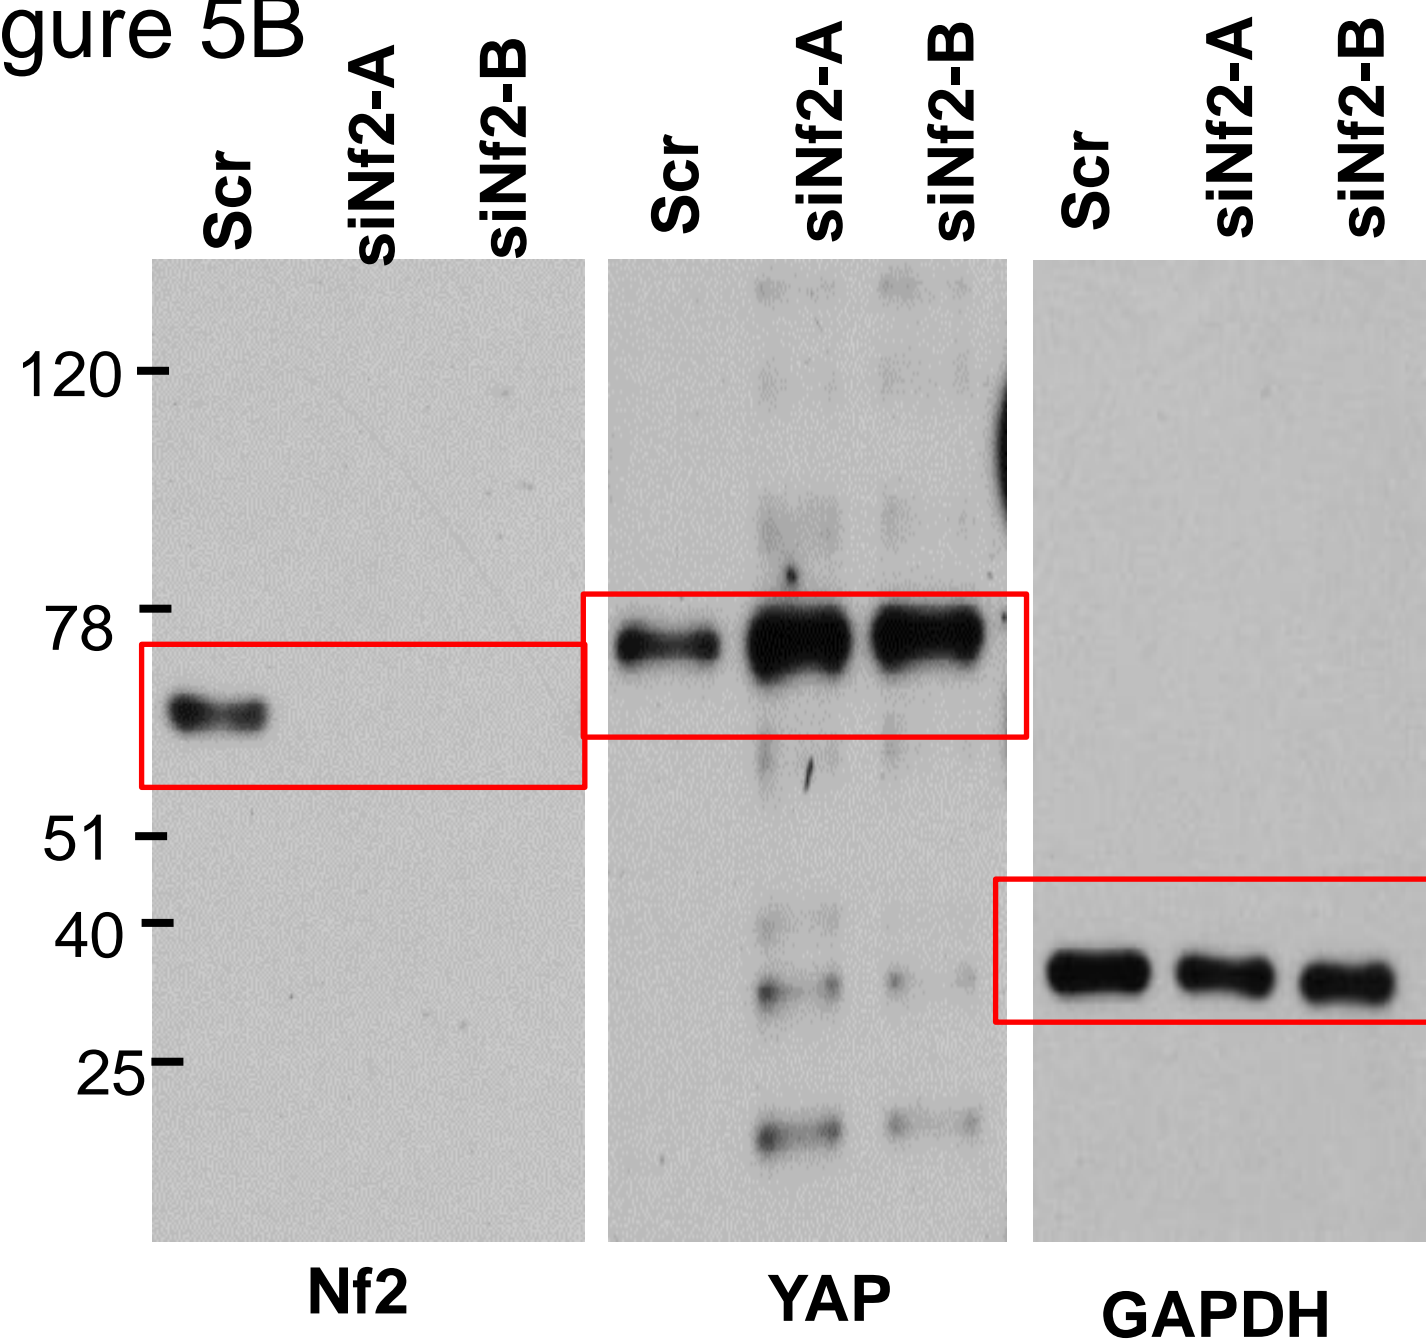

Figure 5C

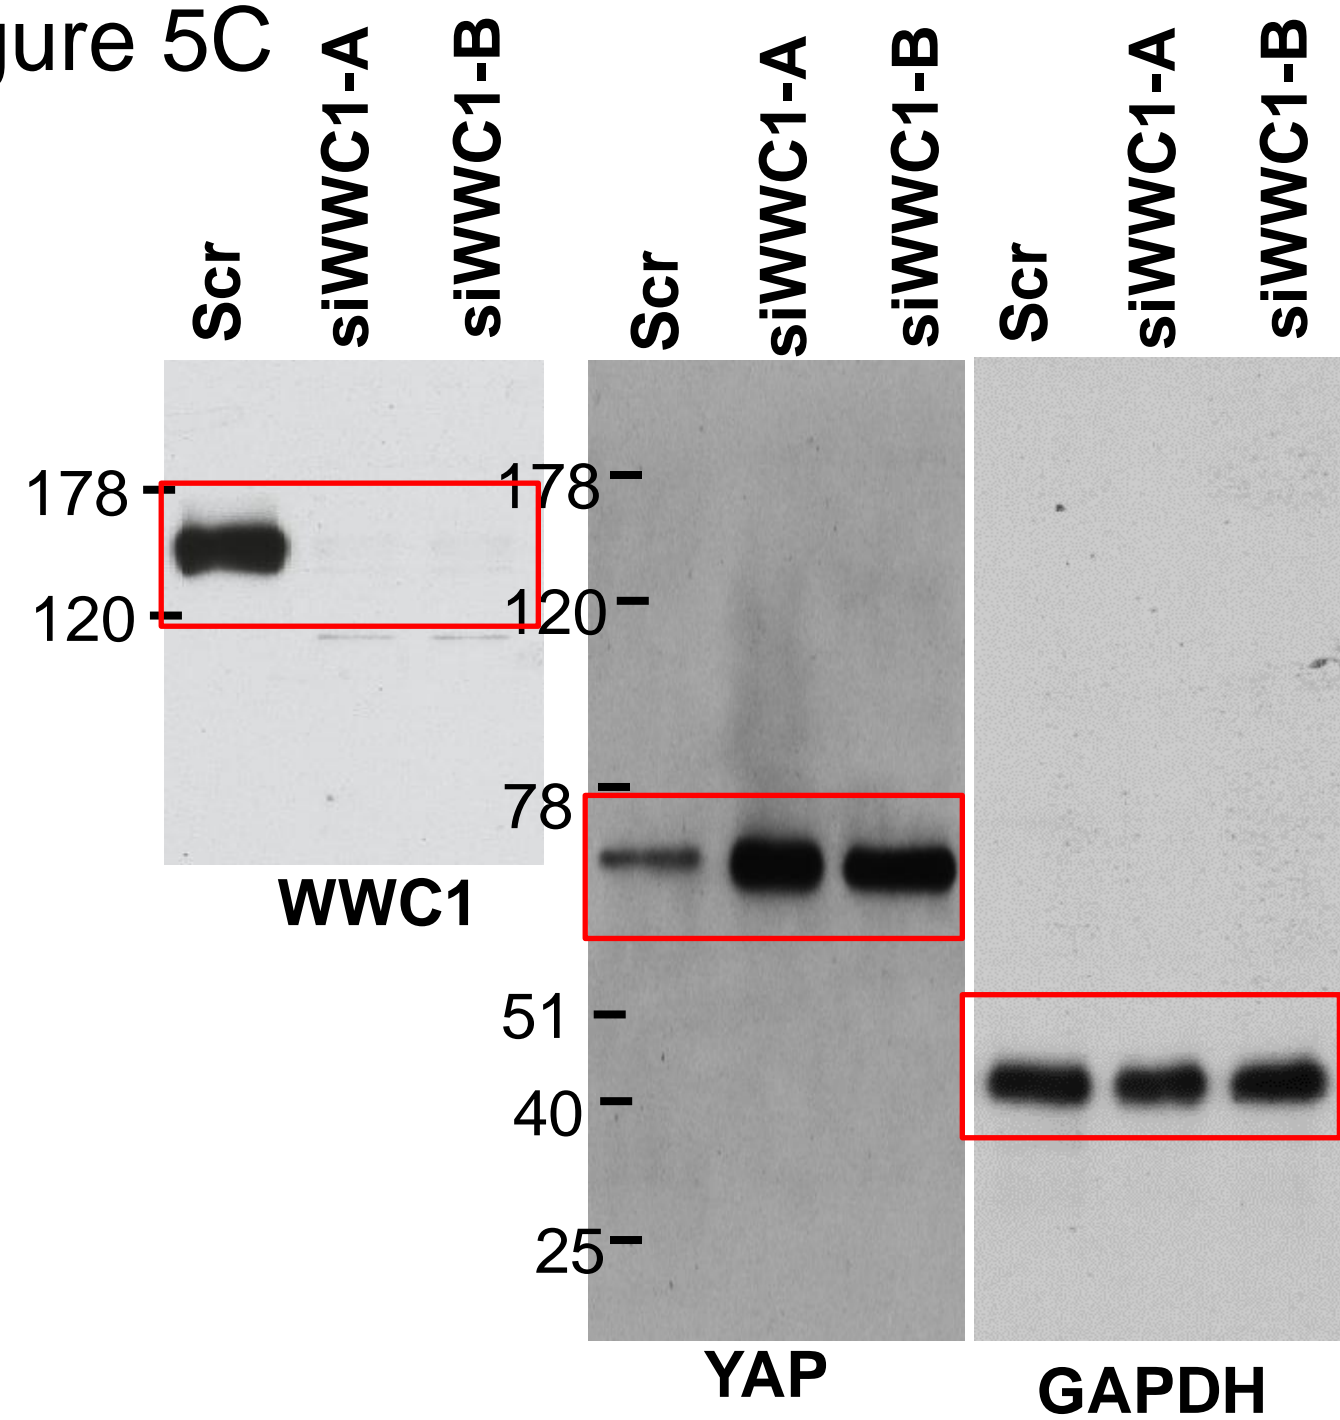

Figure 6B

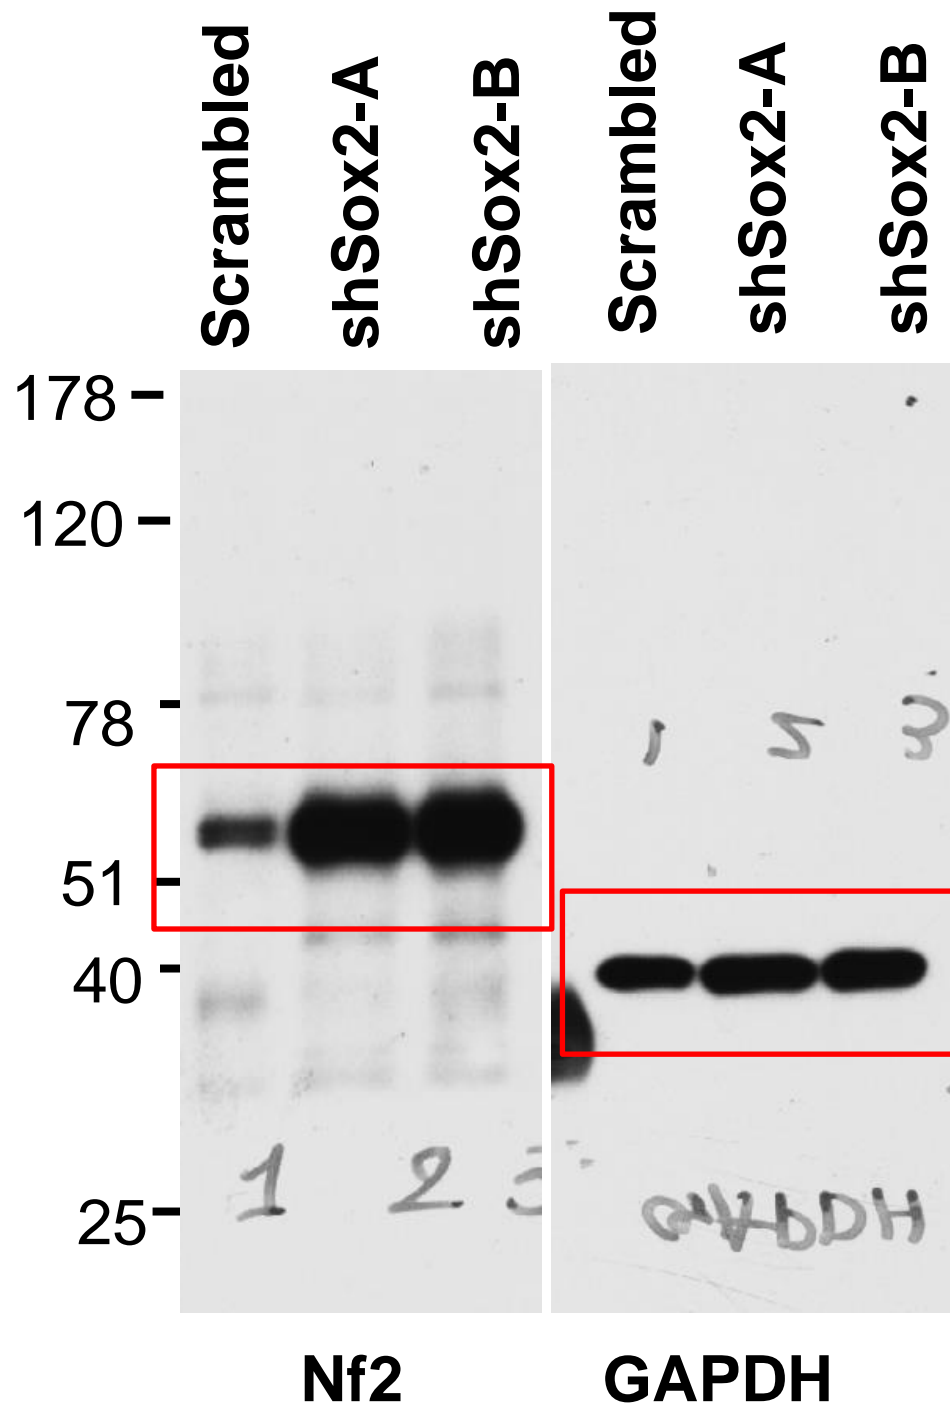

Figure 6C

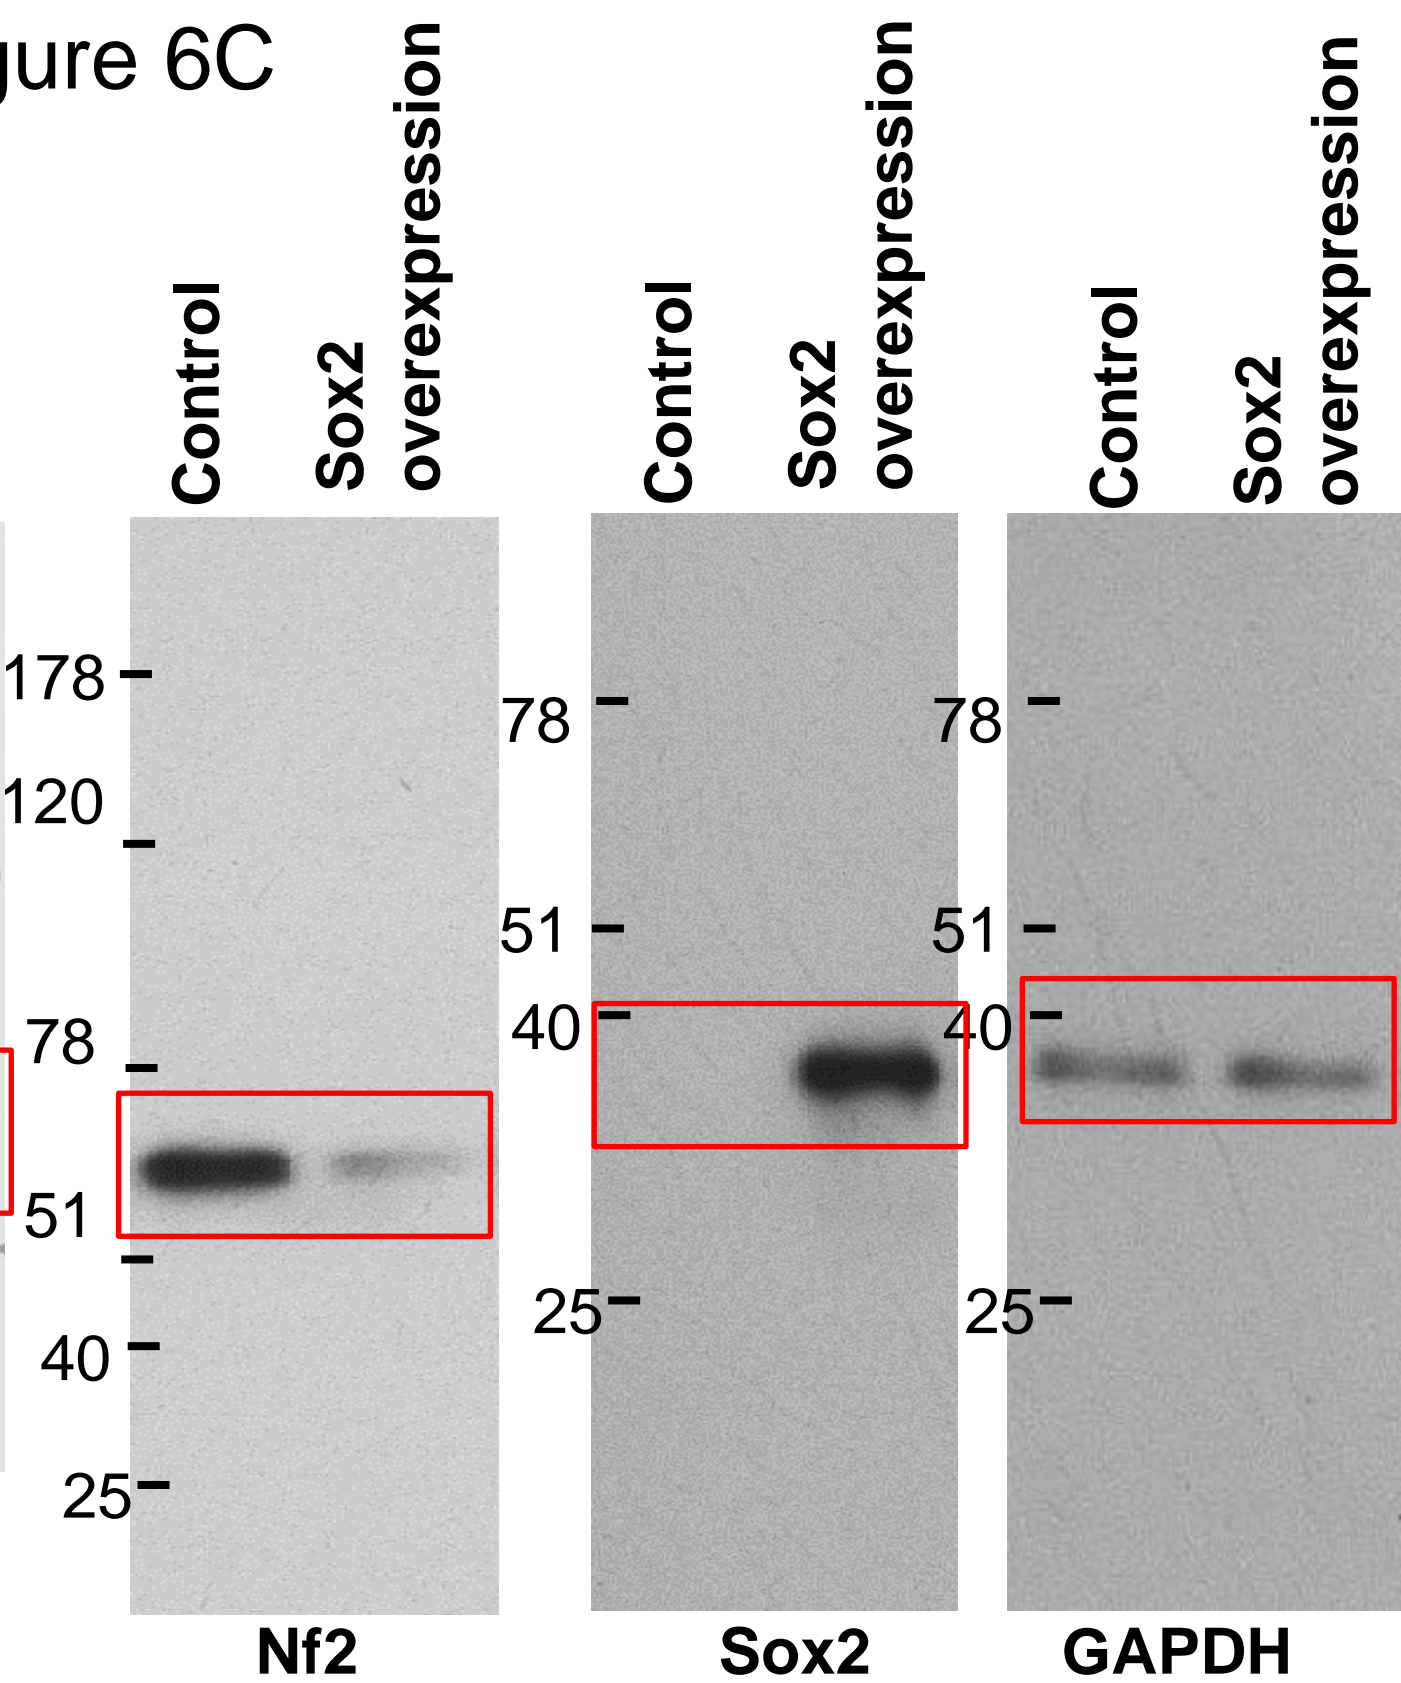

Figure 7B

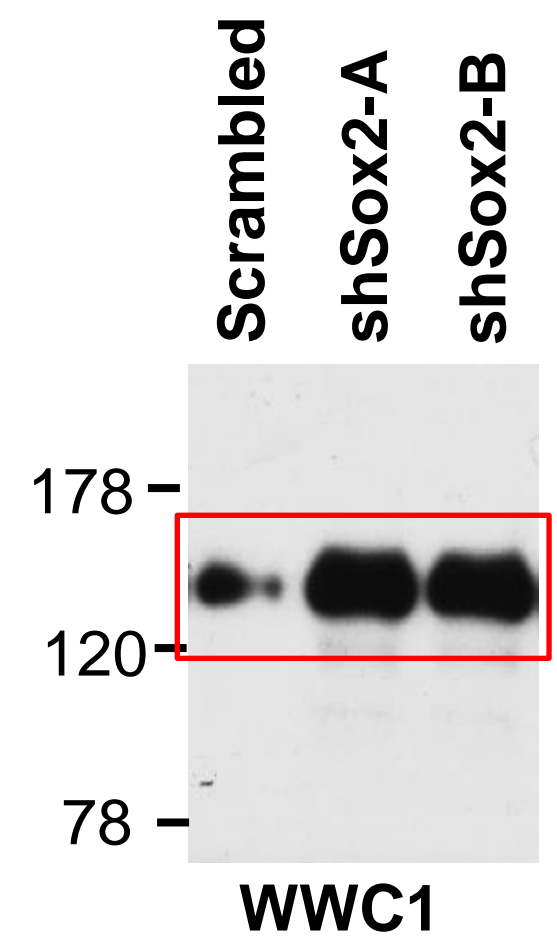

Figure 7C

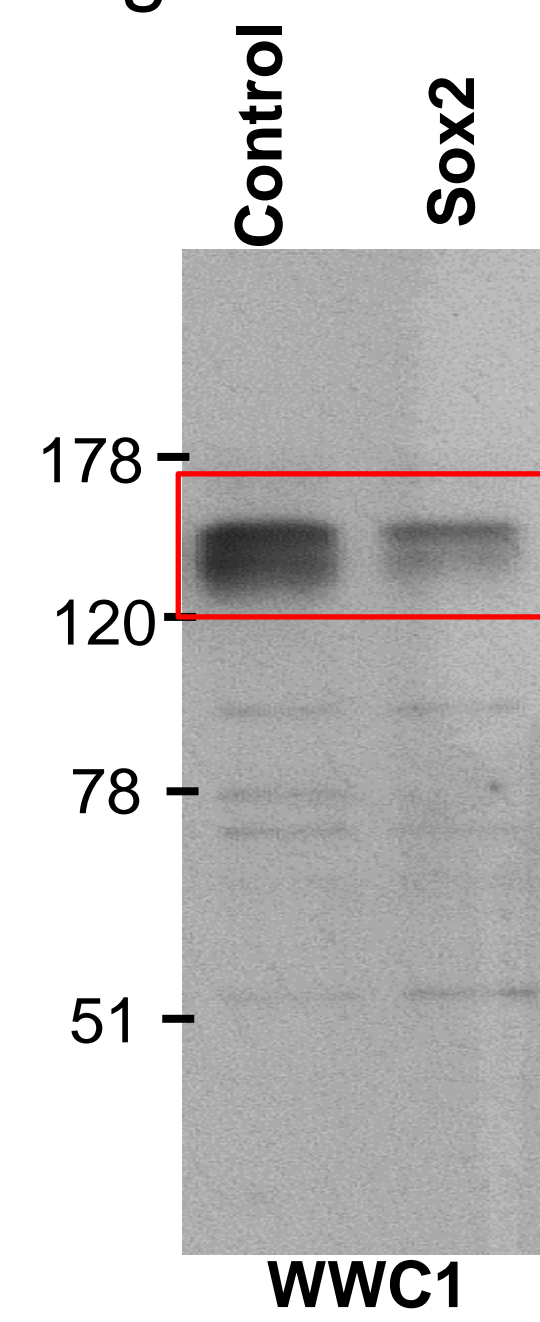

Figure 8A

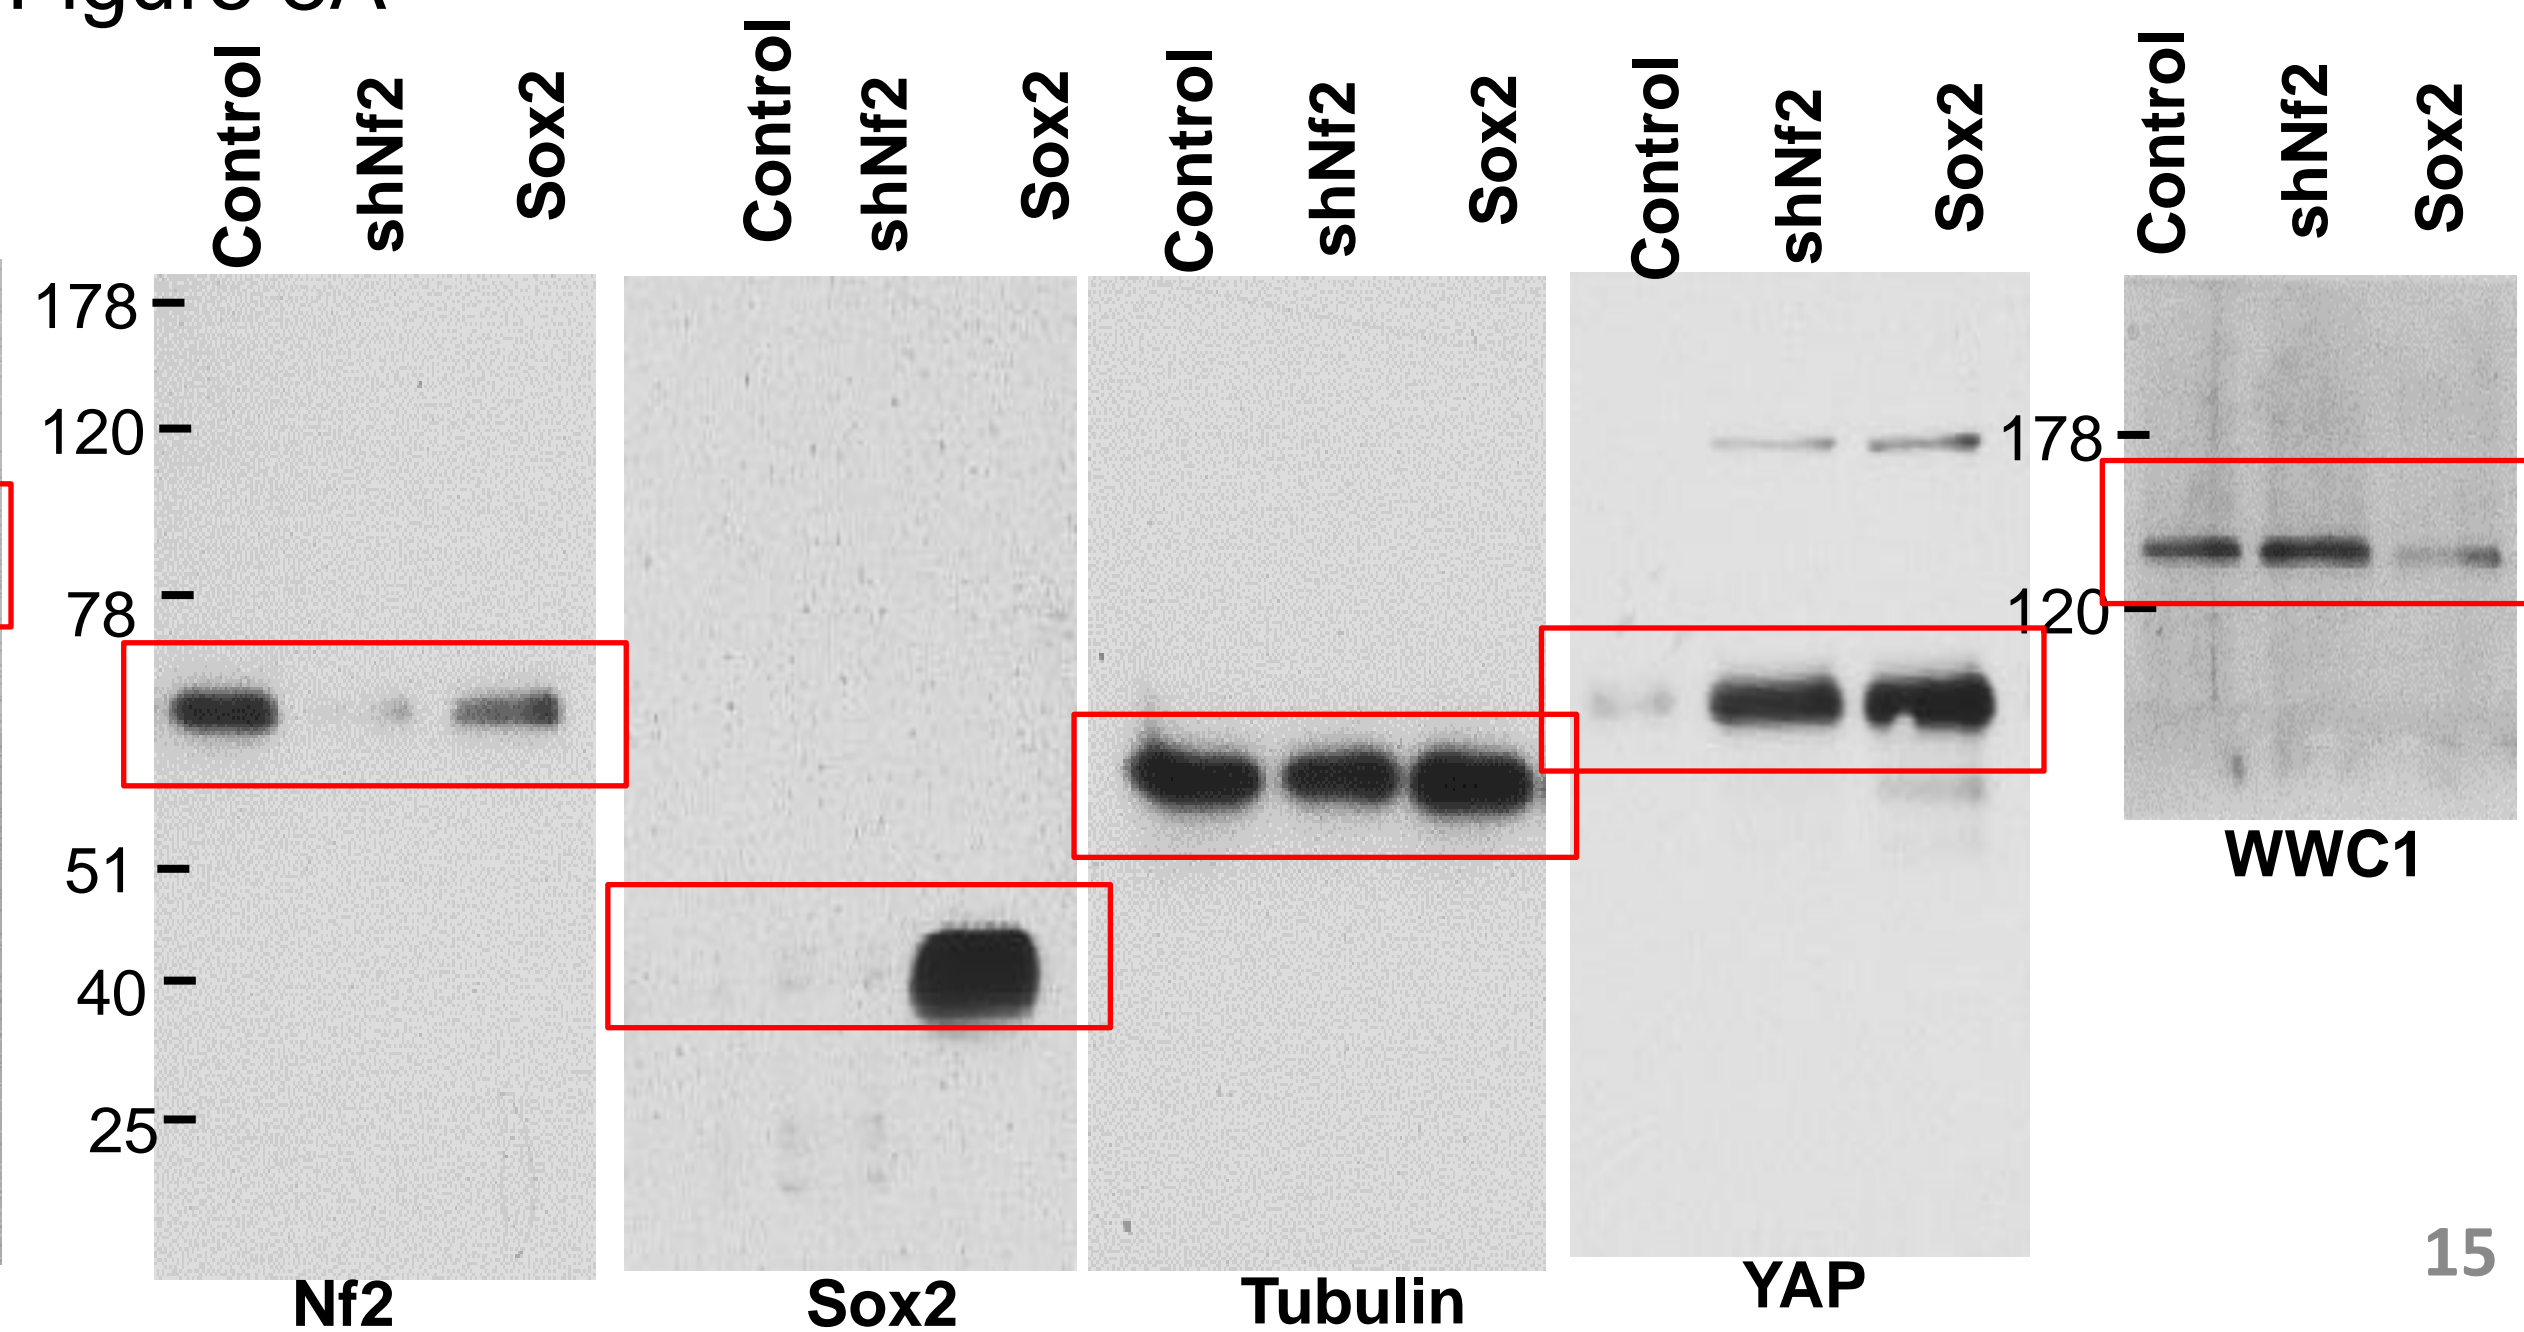

Figure 8B

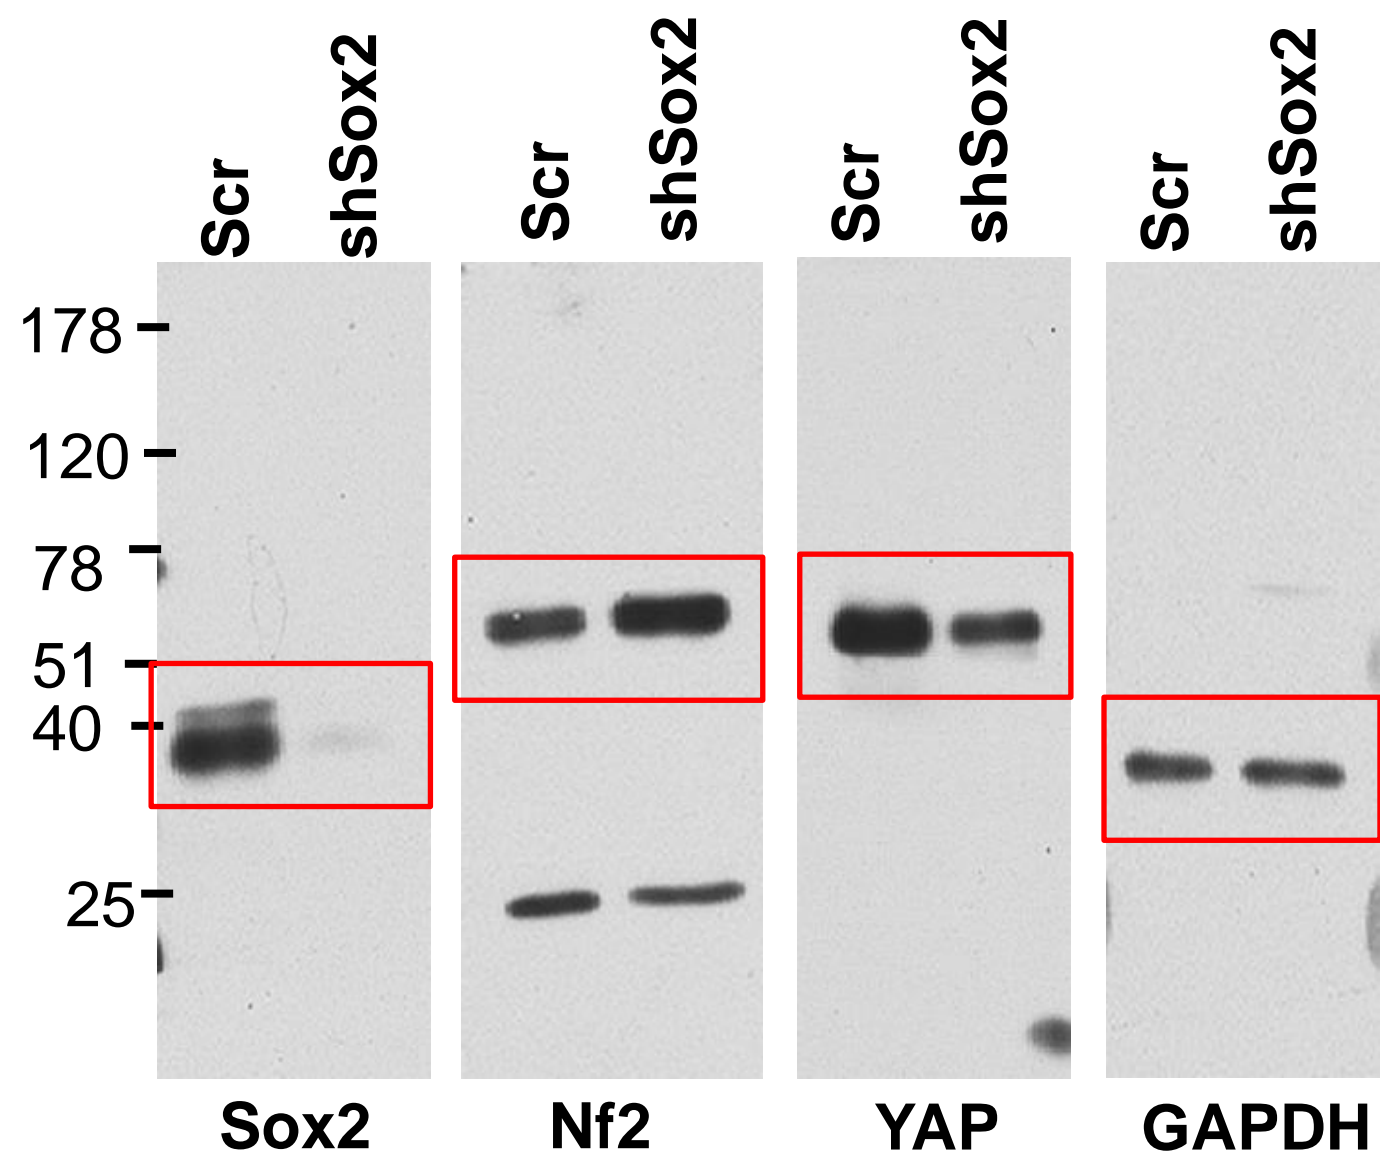

Figure 8C

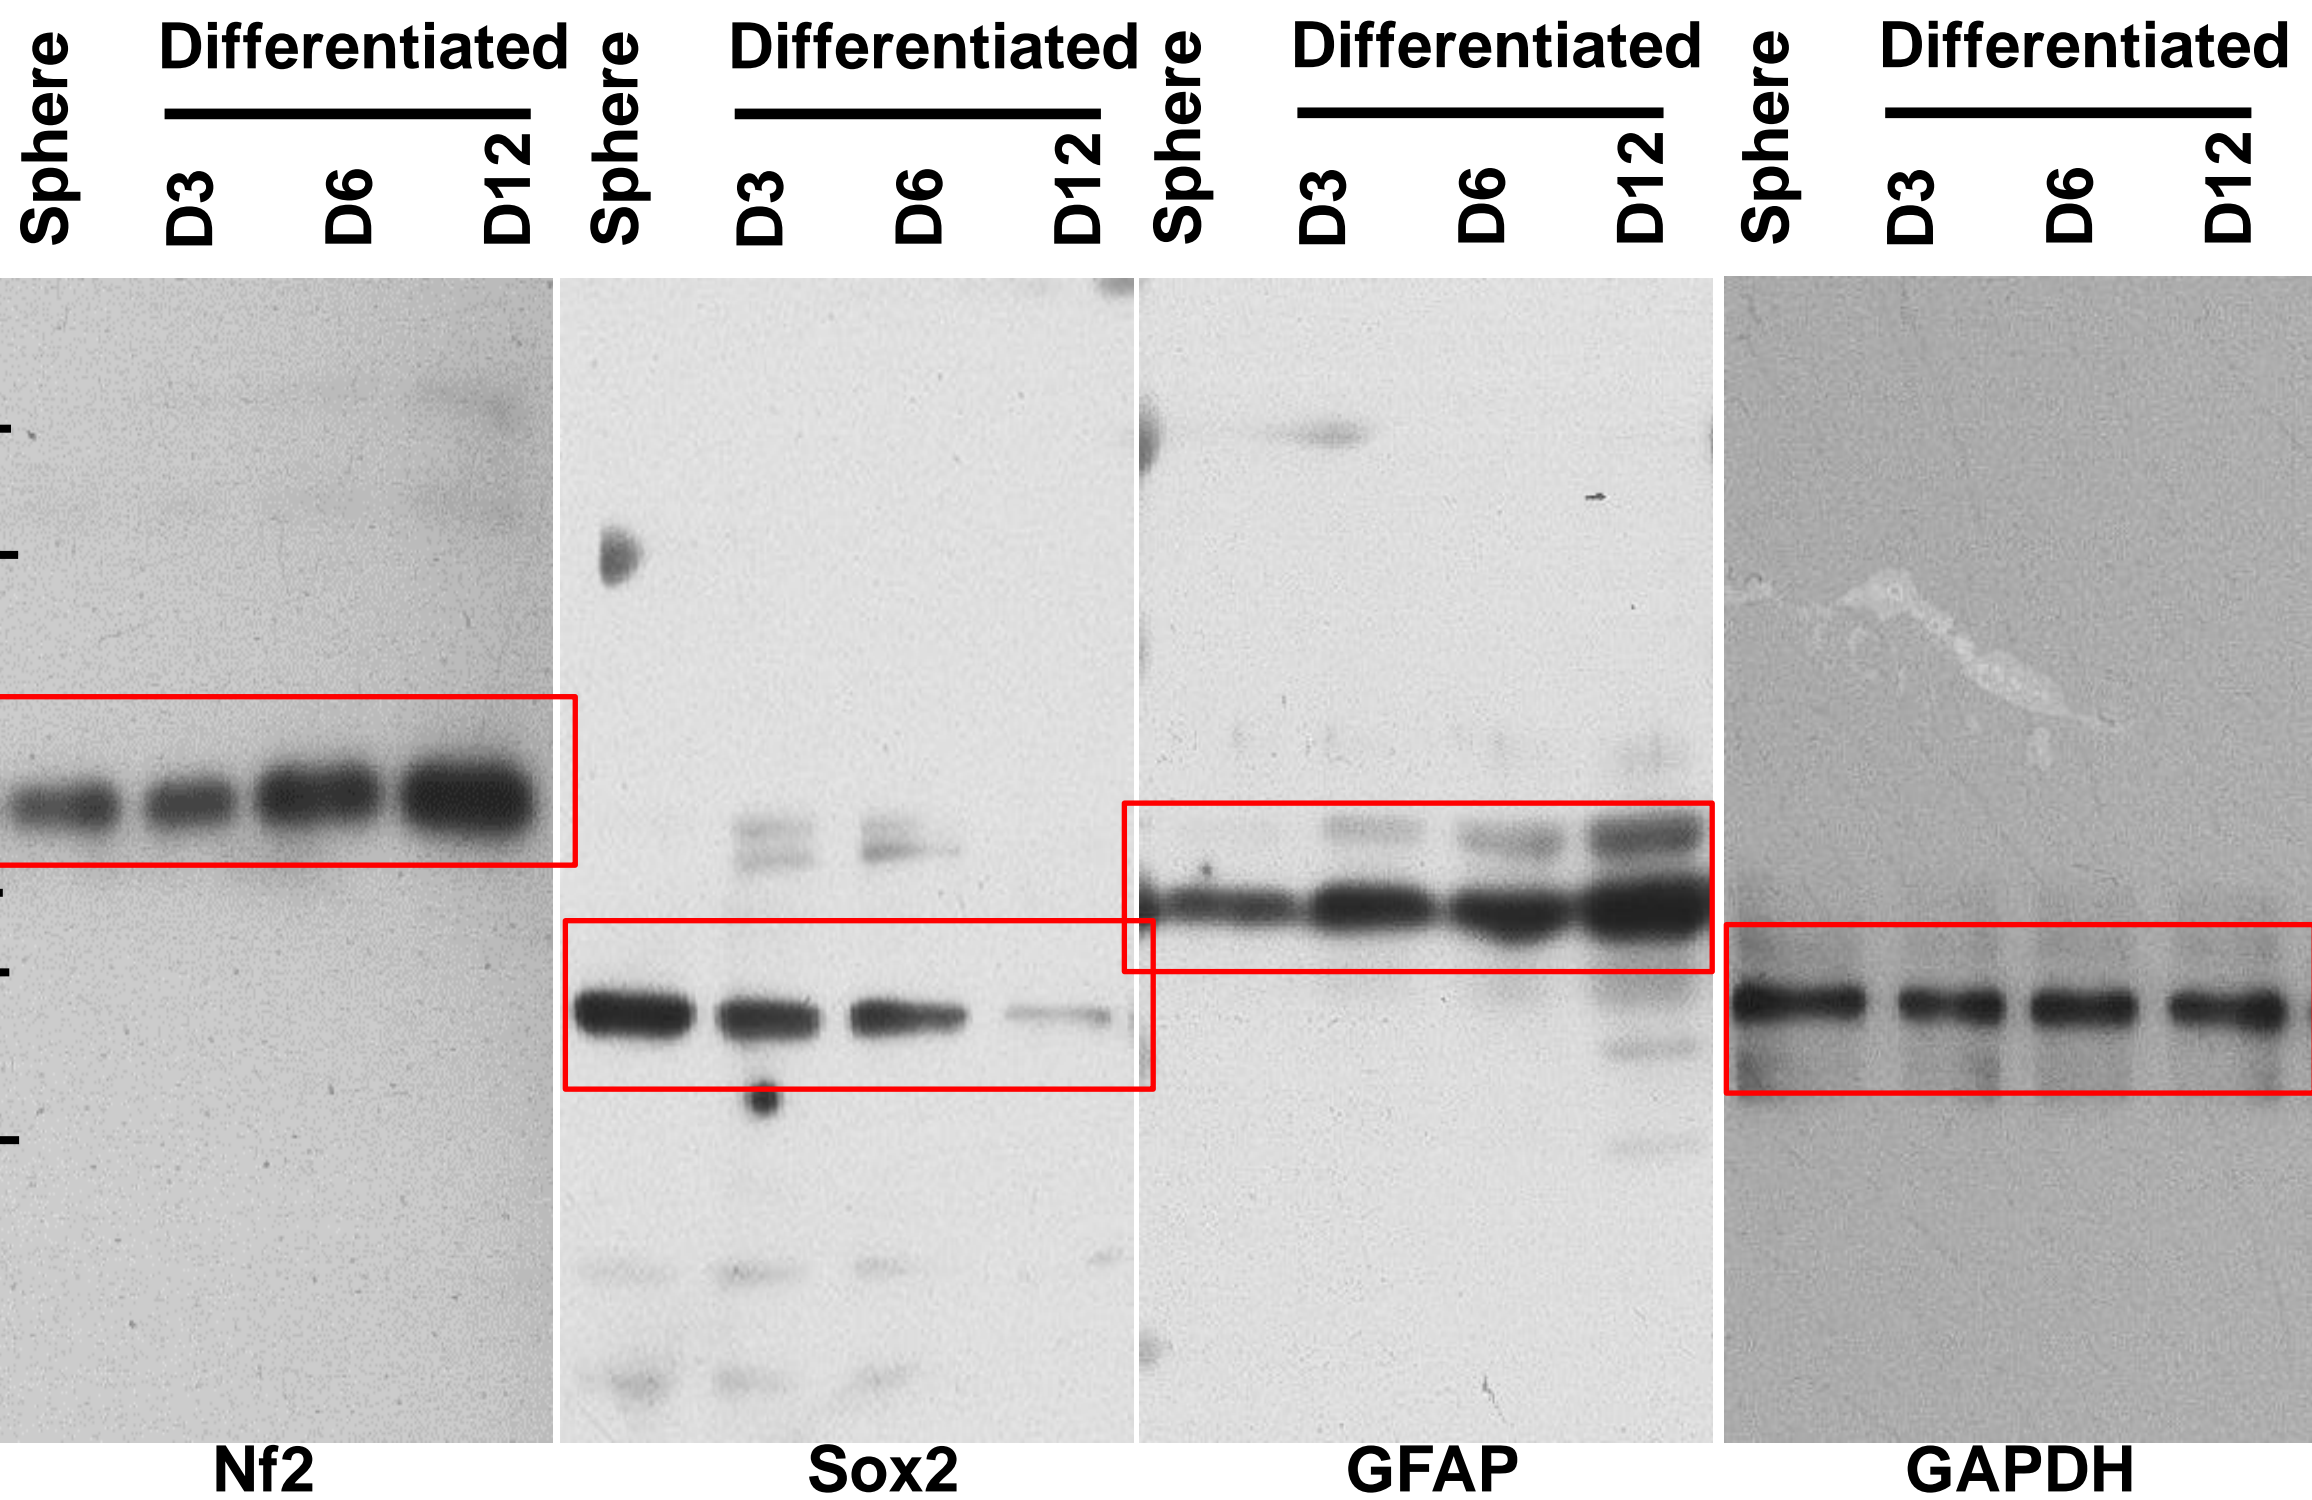



## **Supplementary Table 1- Antibodies used in the study**

### **Western Blotting**

| <b>Protein</b> | <b>Manufacturer</b> | <b>Catalog Number</b> | <b>Dilution</b> |
|----------------|---------------------|-----------------------|-----------------|
| Sox2           | Cell Signaling      | 2748                  | 1:500           |
| YAP            | Cell Signaling      | 4912                  | 1:1000          |
| Phospho-YAP    | Cell Signaling      | 4911                  | 1:1000          |
| Nf2            | Cell Signaling      | 6995                  | 1:500           |
| WWC1           | Cell Signaling      | 8774                  | 1:500           |
| Mst1           | Cell Signaling      | 3682                  | 1:1000          |
| Mst2           | Cell Signaling      | 3952                  | 1:1000          |
| Lats1          | Cell Signaling      | 3477                  | 1:1000          |
| Lats2          | Cell Signaling      | 5888                  | 1:1000          |
| GFAP           | Dako                | M076101-2             | 1:500           |
| GAPDH          | SCBT                | sc-32233              | 1:1000          |
| Tubulin        | Sigma               | T6074                 | 1:2000          |

### **Immunofluorescence**

| <b>Protein</b> | <b>Manufacturer</b> | <b>Catalog Number</b> | <b>Dilution</b> |
|----------------|---------------------|-----------------------|-----------------|
| YAP            | SCBT                | sc-271134             | 1:200           |

### **Immunohistochemistry**

| <b>Protein</b> | <b>Manufacturer</b> | <b>Catalog Number</b> | <b>Dilution</b> |
|----------------|---------------------|-----------------------|-----------------|
| Sox2           | Millipore           | AB5603                | 1:200           |
| YAP            | SCBT                | sc-271134             | 1:200           |

## Supplementary Table 2 – Primers/siRNA/shRNA used in this study

### ChIP PCR Primer

| Gene | Direction | Sequence                       |
|------|-----------|--------------------------------|
| Nf2  | Forward   | CGC TCC TTC TCA ACC AGT CT     |
|      | Reverse   | GGC CTA CTC CAC CAA TTG AA     |
| WWC1 | Forward   | GCG CTC TTG TTG GTT TGA AG     |
|      | Reverse   | GCC ACT TAA TGC TGC TTT AGT TC |

### qRT-PCR Primer

| Gene          | Direction | Sequence                       |
|---------------|-----------|--------------------------------|
| Nf2           | Forward   | CTA GTT CAA GAG ATC ACG CAA CA |
|               | Reverse   | GGC AGT AGA CCT TTT CAT CCA AA |
| WWC1          | Forward   | TGC TGA GGG AAA CCA AAG CC     |
|               | Reverse   | CTG GAC CAT AGG TCG GAG TG     |
| YAP           | Forward   | ACC CTC GTT TTG CCA TGA AC     |
|               | Reverse   | TGT GCT GGG ATT GAT ATT CCG TA |
| Actin         | Forward   | GGC TGT ATT CCC CTC CAT CG     |
|               | Reverse   | CCA GTT GGT AAC AAT GCC ATG T  |
| aP2           | Forward   | AAG GTG AAG AGC ATC ATA ACC CT |
|               | Reverse   | TCA CGC CTT TCA TAA CAC ATT CC |
| PPAR $\gamma$ | Forward   | TTT TCA AGG GTG CCA GTT TC     |
|               | Reverse   | AAT CCT TGG CCC TCT GAG AT     |
| Osterix       | Forward   | GGA AAG GAG GCA CAA AGA AGC    |
|               | Reverse   | CCC CTT AGG CAC TAG GAG C      |
| BSP           | Forward   | GGA GGG GGC TTC ACT GAT        |
|               | Reverse   | AAC AAT CCG TGC CAC CA         |

| <b>Gene</b> | <b>Direction</b> | <b>Sequence</b>                |
|-------------|------------------|--------------------------------|
| CTGF        | Forward          | GGC CTC TTC TGC GAT TTC G      |
|             | Reverse          | GCA GCT TGA CCC TTC TCG G      |
| Cyr61       | Forward          | CTC CAG AAT CTA CCA AAA CGG G  |
|             | Reverse          | CGT CCA GGG AGT CCT TAA TGC    |
| DYN3        | Forward          | GAC GGC CTC TTG TAC TCC AG     |
|             | Reverse          | CTG TTA CGC GGT CTG TTT CTG    |
| PTGS2       | Forward          | TGC ACT ATG GTT ACA AAA GCT GG |
|             | Reverse          | TCA GGA AGC TCC TTA TTT CCC TT |
| LOX         | Forward          | TCT TCT GCT GCG TGA CAA CC     |
|             | Reverse          | GAG AAA CCA GCT TGG AAC CAG    |
| BDNF        | Forward          | TTA CCT GGA TGC CGC AAA CAT    |
|             | Reverse          | TGA CCC ACT CGC TAA TAC TGT C  |

### **Primers for site-directed mutagenesis (Figure 6D)**

| <b>Gene</b>                      | <b>Direction</b> | <b>Sequence</b>                                          |
|----------------------------------|------------------|----------------------------------------------------------|
| Nf2 promoter (Sox2-binding site) | Forward          | GGT CAC TCC GAG CGC TTT CGA TCC TAA AGT<br>ATA CTC CTA C |
|                                  | Reverse          | GTA GGA GTA TAC TTT AGG ATC GAA AGC GCT<br>CGG AGT GAC C |

## **shRNAs used in this study (obtained from Sigma unless otherwise stated)**

| <b>Gene</b> | <b>Sample</b> | <b>Catalog Number</b>                                            |
|-------------|---------------|------------------------------------------------------------------|
| Nf2         | shRNA-A       | SHCLNG-NM_010898_TRCN0000042519                                  |
|             | shRNA-B       | SHCLNG-NM_010898_TRCN0000042520                                  |
| Sox2        | shRNA-A       | Described in BasuRoy et al, Cell Death and Differentiation, 2010 |
|             | shRNA-B       | Described in BasuRoy et al, Cell Death and Differentiation, 2010 |
| YAP         | shRNA-A       | SHCLNG-NM_009534_TRCN0000238436                                  |
|             | shRNA-B       | SHCLNG-NM_009534_TRCN0000238432                                  |

## **siRNAs used in this study (obtained from Ambion/Life Technologie)**

| <b>Gene</b> | <b>Sample</b> | <b>Catalog Number</b> |
|-------------|---------------|-----------------------|
| Nf2         | siRNA-A       | 4390771-s70500        |
|             | siRNA-B       | 4390771-s70501        |
| WWC1        | siRNA-A       | 4390771- s102485      |
|             | siRNA-B       | 4390771-s102486       |
| YAP         | siRNA-A       | 4390771-s76160        |
|             | siRNA-B       | 4390771-s202423       |
| TAZ         | siRNA-A       | 4390771-s97145        |
|             | siRNA-B       | 4390771-s97146        |
| Lats1       |               | 4390771-s201588       |
| Lats2       |               | 4390771-s78350        |
| Mst1        |               | AM16708-62215         |
| Mst2        |               | AM16708 - 73946       |
